# Supplementary material for: Sequencing Illustrates the Transcriptional Response of Legionella pneumophila during Infection and Identifies Seventy Novel Small Non-Coding RNAs
Source: PLoS One. 2011 Mar 3;6(3):e17570. doi: 10.1371/journal.pone.0017570 (PMC3048289; doi:10.1371/journal.pone.0017570)
Supplement: Table S4 — COG enrichment. (XLS) [file pone.0017570.s004.xls]

## Sheet: Sheet1
COG ID for the various infection and growth time points
E and PE represents exponential and post-exponetial growth of L. pneumophila Phil-1 grown in broth (T7 and T12)
RP and TP represents replicative phase and transmissive phase of L. pneumophila Phil-1 grown inside of A. castellanii (T11 and T14)
COG function				RP vs TP up at TP					RP vs TP up at RP					E vs PE up at PE					E vs PE up at E
		numbers of genes		numbers of genes	number of	differentially			numbers of genes	number of	differentially			numbers of genes	number of	differentially			numbers of genes	number of	differentially
		in genome with		in genome without	differentially	expressed			in genome without	differentially	expressed			in genome without	differentially	expressed			in genome without	differentially	expressed
		corresponding		corresponding	expressed	genes with			corresponding	expressed	genes with			corresponding	expressed	genes with			corresponding	expressed	genes with
		annotation		annotation	genes	annotation	p value		annotation	genes	annotation	p value		annotation	genes	annotation	p value		annotation	genes	annotation	p value
Energy production and conversion		163		2007	502	50	0.0130358		2007	421	40	0.0551412		2019	285	27	0.106255		2019	1703	120	0.933232
Cell cycle control, cell division, chromosome partitioning		30		2140	502	8	0.38989		2140	421	5	0.719833		2152	285	4	0.564482		2152	1703	25	0.326843
Amino acid transport and metabolism		217		1953	502	36	0.994918		1953	421	40	0.676786		1965	285	14	0.99967		1965	1703	188	0.000522969
Nucleotide transport and metabolism		62		2108	502	8	0.986436		2108	421	24	0.000270582		2120	285	5	0.923687		2120	1703	53	0.0965378
Carbohydrate transport and metabolism		114		2056	502	12	0.999879		2056	421	31	0.0237692		2068	285	5	0.9996		2068	1703	105	3.74101e-05
Coenzyme transport and metabolism		104		2066	502	11	0.999762		2066	421	17	0.824299		2078	285	8	0.972224		2078	1703	91	0.00879395
Lipid transport and metabolism		126		2044	502	48	7.19333e-05		2044	421	17	0.971648		2056	285	24	0.0319355		2056	1703	93	0.900476
Translation, ribosomal structure and biogenesis		176		1994	502	11	1		1994	421	97	2.58441e-11		2006	285	4	1		2006	1703	168	5.44554e-11
Transcription		127		2043	502	15	0.999719		2043	421	21	0.830444		2051	285	15	0.752645		2051	1703	98	0.848944
Replication, recombination and repair		147		2023	502	12	1		2023	421	25	0.806108		2034	285	7	0.999859		2034	1703	123	0.072401
Cell wall/membrane/envelope biogenesis		162		2008	502	44	0.122591		2008	421	28	0.789715		2020	285	15	0.951875		2020	1703	136	0.0337556
Cell motility		67		2103	502	43	0		2103	421	2	0.999993		2115	285	38	0		2115	1703	24	1
Posttranslational modification, protein turnover, chaperones		120		2050	502	26	0.68785		2050	421	29	0.109362		2061	285	29	0.000541202		2061	1703	78	0.999861
Inorganic ion transport and metabolism		115		2055	502	26	0.592274		2055	421	12	0.997397		2067	285	12	0.841928		2067	1703	96	0.0889288
Secondary metabolites biosynthesis, transport and catabolism		94		2076	502	34	0.00241377		2076	421	9	0.99741		2088	285	12	0.582893		2088	1703	70	0.837886
General function prediction only		386		1784	502	82	0.850482		1784	421	51	0.999832		1795	285	39	0.979794		1795	1703	309	0.191564
Function unknown		187		1983	502	52	0.0694244		1983	421	13	1		1991	285	32	0.0735144		1991	1703	139	0.971328
Signal transduction mechanisms		107		2063	502	42	9.38833e-05		2063	421	8	0.999881		2072	285	27	0.000565827		2072	1703	64	1
Intracellular trafficking, secretion, and vesicular transport		94		2076	502	29	0.0487337		2076	421	12	0.968994		2088	285	17	0.0967161		2088	1703	66	0.974375
Defense mechanisms		40		2130	502	12	0.194964		2130	421	3	0.990484		2142	285	5	0.614231		2142	1703	30	0.752371
