# Supplementary material for: Sequencing Illustrates the Transcriptional Response of Legionella pneumophila during Infection and Identifies Seventy Novel Small Non-Coding RNAs
Source: PLoS One. 2011 Mar 3;6(3):e17570. doi: 10.1371/journal.pone.0017570 (PMC3048289; doi:10.1371/journal.pone.0017570)
Supplement: Table S5 — Coding genes expression for glucose utilization. (XLS) [file pone.0017570.s005.xls]

## Sheet: p values
	Expression counts of the transcriptome
	Genes involved in Pentose-P pathway, Glycolysis and Entner-Doudoroff pathway
	E and PE represents exponential and post-exponetial growth of L. pneumophila Phil-1 grown in broth (T7 and T12)
	RP and TP represents replicative phase and transmissive phase of L. pneumophila Phil-1 grown inside of A. castellanii (T11 and T14)
	Red color shows up-regulation and green color down-regulation at late infection or broth growth time points (TP and PE)
	RPM = reads per million
GeneNames	Type	Pos	Strand	Length	PID	Gene	Synonym	COG	Product	t11 raw counts	t14 raw counts	t7 raw counts	t12 raw counts	RP - RPM	TP - RPM	E - RPM	PE - RPM	M RP vs TP	M E vs PE	M normalized RP vs TP	M normalized E vs PE	p RP vs TP	p E vs PE	q RP vs TP	q E vs PE	q < 0.0001 RP vs TP	q < 0.0001 E vs PE
654_2012_gene	gene	107663..108313	+	216	52627460	rpiA	lpg0094	COG0120G	ribose-5-phosphate isomerase A	78	122	687	117	100.343	104.64	193.28	33.9243	-0.645335	2.5538	-0.0604815	2.5103	0.836312	6.17389e-98	0.312404	2.20095e-98	FALSE	TRUE
2026_3129_gene	gene	163368..164792	-	474	52627502	pykA	lpg0136	COG0469G	pyruvate kinase II	474	514	1847	824	609.78	440.858	519.634	238.92	-0.116881	1.16447	0.467972	1.12097	4.23867e-07	2.70735e-80	6.23976e-07	8.17441e-81	TRUE	TRUE
3126_4187_gene	gene	164776..165966	-	396	52627503	pgk	lpg0137	COG0126G	phosphoglycerate kinase	1240	1609	3917	1495	1595.2	1380.04	1102.01	433.478	-0.375824	1.3896	0.209029	1.3461	0.000128757	6.75731e-194	0.000142508	4.62321e-194	FALSE	TRUE
4482_6902_gene	gene	165977..167005	-	342	52627504	gap	lpg0138	COG0057G	glyceraldehyde 3-phosphate dehydrogenase	903	823	3590	1381	1161.67	705.888	1010.01	400.423	0.133834	1.37827	0.718687	1.33477	1.59382e-25	3.96432e-180	6.82897e-25	2.47103e-180	TRUE	TRUE
7271_8317_gene	gene	167051..169129	-	692	52627505	tktA	lpg0139	COG0021G	transketolase I	1214	1163	8446	1859	1561.76	997.507	2376.19	539.02	0.0619173	2.18374	0.646771	2.14024	2.70419e-27	0	1.24467e-26	0	TRUE	TRUE
8314_10206_gene	gene	455156..456646	+	496	52627772	zwf	lpg0416	COG0364G	glucose-6-phosphate-1-dehydrogenase	320	268	1842	202	411.666	229.864	518.227	58.5702	0.255839	3.18885	0.840693	3.14535	9.10386e-13	0	2.16607e-12	0	TRUE	TRUE
10226_11083_gene	gene	456615..457346	+	243	52627773	pgl	lpg0417	COG0363G	6-phosphogluconolactonase	222	164	1067	202	285.593	140.663	300.189	58.5702	0.436864	2.40113	1.02172	2.35763	8.07771e-13	2.45626e-134	1.93943e-12	1.18555e-134	TRUE	TRUE
11612_12871_gene	gene	457334..459172	+	612	52627774	edd	lpg0418	COG0129EG	6-phosphogluconate dehydratase	566	516	3157	699	728.133	442.574	888.189	202.676	0.133431	2.17519	0.718285	2.13169	4.11136e-16	0	1.15252e-15	0	TRUE	TRUE
13059_13316_gene	gene	459147..460154	+	335	52627775	glk	lpg0419	COG0837G	glucokinase	198	168	582	63	254.718	144.094	163.74	18.267	0.237039	3.2076	0.821893	3.1641	1.54405e-08	3.9512e-107	2.57105e-08	1.54699e-107	TRUE	TRUE
13329_14588_gene	gene	460141..460803	+	220	52627776	eda	lpg0420	COG0800G	multifunctional: 2-keto-3-deoxygluconate 6-phosphate aldolase/(4-hydroxy-2-oxoglutarate aldolase	133	118	488	67	171.099	101.209	137.294	19.4268	0.172639	2.86465	0.757493	2.82115	2.1547e-05	8.83489e-81	2.6439e-05	2.6755e-81	TRUE	TRUE
14693_15163_gene	gene	460916..462337	+	473	52627777	ywtG	lpg0421	COG0477GEPR	D-xylose (galactose, arabinose)-proton symporter	219	250	670	222	281.734	214.425	188.497	64.3693	-0.190997	1.5936	0.393856	1.5501	0.00206726	3.84127e-50	0.0018784	8.11384e-51	FALSE	TRUE
15332_16909_gene	gene	512912..513922	-	336	52627826	-	lpg0470	COG3588G	fructose bisphosphate aldolase	536	701	1861	798	689.54	601.249	523.573	231.381	-0.387181	1.22162	0.197672	1.17812	0.0148842	1.3751e-87	0.0111852	4.55828e-88	FALSE	TRUE
17043_17894_gene	gene	1663729..1666410	-	893	52628845	aceE	lpg1504	COG2609C	pyruvate dehydrogenase E1 component oxidoreductase protein AceE	883	1077	4228	2619	1135.94	923.744	1189.5	759.383	-0.286533	0.690959	0.298321	0.647459	3.73623e-06	2.45639e-58	5.03592e-06	5.73726e-59	TRUE	TRUE
75853_76467_gene	gene	1721538..1722632	+	364	52628899	-	lpg1558	COG1071C	pyruvate dehydrogenase E1 alpha subunit	926	981	3045	604	1191.26	841.405	856.679	175.131	-0.0832409	2.33382	0.501613	2.29032	2.03505e-14	0	5.2063e-14	0	TRUE	TRUE
76451_77398_gene	gene	1722625..1723599	+	324	52628900	-	lpg1559	COG0022C	pyruvate dehydrogenase E1 beta subunit	612	594	1978	503	787.31	509.475	556.489	145.846	0.0430687	1.97541	0.627922	1.93191	4.02969e-14	1.84263e-195	1.01856e-13	1.27355e-195	TRUE	TRUE
77642_78820_gene	gene	1723602..1724714	+	370	52628901	-	lpg1560	COG0508C	dihydrolipoamide acetyltransferase	746	785	2397	710	959.695	673.296	674.371	205.866	-0.073517	1.75534	0.511337	1.71184	2.16493e-12	2.51753e-193	5.0373e-12	1.71666e-193	TRUE	TRUE
77828_78052_gene
78867_80858_gene
81213_82814_gene
82906_84477_gene
84555_84869_gene
85025_85606_gene
85693_87021_gene
87011_88213_gene
88210_89373_gene
89551_90318_gene
90308_91633_gene
91808_92371_gene
92368_93315_gene
93312_94835_gene
94825_95352_gene
95581_97527_gene
97493_98083_gene
98310_99086_gene
99132_99578_gene
99689_103663_gene
103878_104342_gene
104748_106928_gene
106894_107670_gene
107663_108313_gene
108377_109756_gene
109946_111139_gene
111300_111641_gene
111756_112208_gene
112238_114928_gene
114931_116001_gene
116250_117032_gene
117029_118258_gene
118383_119243_gene
119362_119937_gene
120045_120641_gene
120944_122224_gene
122242_123048_gene
122311_122415_gene
123147_123416_gene
124044_125846_gene
125843_126883_gene
127189_130458_gene
130773_132017_gene
132222_133676_gene
133670_133978_gene
133978_135348_gene
135351_135728_gene
135762_136865_gene
136967_137446_gene
137421_137951_gene
138448_140187_gene
140195_141493_gene
141570_142223_gene
142195_142797_gene
142872_143474_gene
143588_146896_gene
146993_148876_gene
148878_149795_gene
149798_151324_gene
151762_154230_gene
154334_155065_gene
155245_155430_gene
155787_156479_gene
156480_157550_gene
157650_163277_gene
163368_164792_gene
164776_165966_gene
165977_167005_gene
167051_169129_gene
169315_170649_gene
170703_172763_gene
173401_174849_gene
174882_175442_gene
174882_176057_gene
176091_176453_gene
176652_176885_gene
177533_177826_gene
178308_179678_gene
179810_181150_gene
181180_182550_gene
182740_183804_gene
184405_184920_gene
185908_186222_gene
187002_187889_gene
188236_189114_gene
189144_190304_gene
190331_191104_gene
191073_191285_gene
191460_191939_gene
192160_193137_gene
193391_193852_gene
194022_194303_gene
194761_195582_gene
194901_195011_gene
195663_196118_gene
196286_197170_gene
197445_197855_gene
197956_198681_gene
198678_199463_gene
199432_200187_gene
200453_201019_gene
201209_201934_gene
202064_202924_gene
203005_204084_gene
204074_204910_gene
204907_206349_gene
206346_207494_gene
207491_208723_gene
208880_209854_gene
209967_210809_gene
211023_211934_gene
211981_212433_gene
212762_214258_gene
214503_215387_gene
215391_216131_gene
216128_217069_gene
217228_218655_gene
218775_219851_gene
219993_220859_gene
220962_221183_gene
221236_222189_gene
222394_222978_gene
223101_223295_gene
223447_225696_gene
225828_226832_gene
227034_228308_gene
228667_228984_gene
229092_230123_gene
230239_231609_gene
231609_232598_gene
232599_233384_gene
233381_233917_gene
233907_235694_gene
235777_236475_gene
236492_238030_gene
238035_238448_gene
238464_238634_gene
238638_241697_gene
241716_243683_gene
243721_244344_gene
244591_244992_gene
245097_246512_gene
246607_247314_gene
247292_247900_gene
247787_248671_gene
248791_249003_gene
249089_250168_gene
250165_250665_gene
250725_251579_gene
251589_251942_gene
251956_254244_gene
254259_255779_gene
255881_256732_gene
256774_258363_gene
258360_259346_gene
259343_260740_gene
260923_262029_gene
262200_263765_gene
263913_264746_gene
264958_267087_gene
267234_269792_gene
270036_270569_gene
270686_272278_gene
272577_277121_gene
277484_277987_gene
278060_280039_gene
280320_281114_gene
281131_282597_gene
282572_283924_gene
284008_284787_gene
285047_285979_gene
286103_286990_gene
287203_287802_gene
288008_289402_gene
289454_292834_gene
293014_293739_gene
293971_294924_gene
295084_295425_gene
295512_296666_gene
296785_298029_gene
298358_298636_gene
298794_299489_gene
299524_300165_gene
300258_300827_gene
300982_302328_gene
302309_303355_gene
303412_304404_gene
304581_306524_gene
306543_308327_gene
308513_308911_gene
309426_309605_gene
309672_310310_gene
310567_311841_gene
311920_312618_gene
312673_314214_gene
314443_314877_gene
314892_315944_gene
316127_316723_gene
316801_318363_gene
318430_319848_gene
319832_320473_gene
320556_320939_gene
320939_322180_gene
322271_323134_gene
323554_326904_gene
327062_328561_gene
328627_330849_gene
330852_332267_gene
332290_333456_gene
333622_334503_gene
334725_335909_gene
335977_336753_gene
336961_338172_gene
338278_339402_gene
339639_340322_gene
340355_341203_gene
342005_342622_gene
342646_343626_gene
343695_345779_gene
345808_347013_gene
347089_347622_gene
347619_348296_gene
348415_350853_gene
350967_351659_gene
351696_352358_gene
352355_353401_gene
353425_356094_gene
356219_357559_gene
357556_358530_gene
358532_359023_gene
359030_359575_gene
362950_363300_gene
363791_364132_gene
363909_364190_gene
365435_366625_gene
366774_367145_gene
367142_367696_gene
367807_368241_gene
368251_368946_gene
369119_369652_gene
369683_370063_gene
370155_374261_gene
374308_378555_gene
378669_379049_gene
379070_379597_gene
379612_381696_gene
381717_382907_gene
382913_383230_gene
383265_383915_gene
383912_384520_gene
384535_384813_gene
384825_385652_gene
385874_386176_gene
385956_386294_gene
386297_386953_gene
386970_387383_gene
387383_387577_gene
387579_387833_gene
387922_388287_gene
388300_388629_gene
388636_389196_gene
389224_389511_gene
389540_389929_gene
389947_390486_gene
390443_390856_gene
390866_391372_gene
391375_391560_gene
391560_391994_gene
391991_393325_gene
393342_393455_gene
393533_393889_gene
393913_394311_gene
394328_394948_gene
394967_395959_gene
395978_396361_gene
396429_396917_gene
396992_398359_gene
398521_399279_gene
399350_399763_gene
399760_400659_gene
400664_401956_gene
401957_403234_gene
403227_404072_gene
404182_404487_gene
404662_407352_gene
407663_408496_gene
408711_409034_gene
409033_409140_gene
409315_409992_gene
409989_410423_gene
410410_410682_gene
410771_411115_gene
412548_413186_gene
413499_413885_gene
414141_414740_gene
414780_419069_gene
419232_419975_gene
419956_421212_gene
421169_422623_gene
422627_423346_gene
423535_424008_gene
424005_424571_gene
424815_425297_gene
425369_428224_gene
428407_428988_gene
428999_430018_gene
430045_430818_gene
430808_431722_gene
431782_431895_gene
431953_433011_gene
433098_433637_gene
433822_434529_gene
435144_436007_gene
436108_436563_gene
436579_436944_gene
436971_437741_gene
437723_438232_gene
438107_438241_gene
438238_438498_gene
438585_439961_gene
440213_440887_gene
441321_443024_gene
443204_444748_gene
445085_446488_gene
446478_447068_gene
447268_447609_gene
447822_448265_gene
448284_448832_gene
449520_450248_gene
450232_450777_gene
450758_451789_gene
451779_452663_gene
452673_453314_gene
453681_454589_gene
454593_454838_gene
455156_456646_gene
456615_457346_gene
457334_459172_gene
459147_460154_gene
460141_460803_gene
460916_462337_gene
462427_463776_gene
463902_464138_gene
464225_464764_gene
464892_465890_gene
465998_466231_gene
466588_466899_gene
467113_467541_gene
467559_468911_gene
469036_470088_gene
470060_470998_gene
470965_471864_gene
471886_472266_gene
472268_472795_gene
472961_473572_gene
473739_474548_gene
474811_476811_gene
477096_477314_gene
477490_478539_gene
478631_478843_gene
479014_479274_gene
479275_479619_gene
479719_480081_gene
480148_480747_gene
480922_482064_gene
482061_484412_gene
484816_485385_gene
485397_485681_gene
485697_486335_gene
486335_487420_gene
487425_490571_gene
490586_491395_gene
491403_491987_gene
492130_492411_gene
492591_493235_gene
493271_496300_gene
496446_497702_gene
497705_500626_gene
500626_501411_gene
501696_503285_gene
503312_504181_gene
504183_505532_gene
505539_506021_gene
506035_506472_gene
506479_506718_gene
506656_508464_gene
509030_510661_gene
510663_511514_gene
511961_512734_gene
512912_513922_gene
514072_514818_gene
514890_515432_gene
515576_515872_gene
516084_516827_gene
517068_517337_gene
517528_517827_gene
517854_519248_gene
519458_519622_gene
519637_519873_gene
519971_520132_gene
520139_520819_gene
520792_521955_gene
522033_523520_gene
523728_524870_gene
524867_525787_gene
525922_527217_gene
527438_528013_gene
528190_528624_gene
528685_528975_gene
529250_529564_gene
529838_530572_gene
530551_531216_gene
531200_531868_gene
531865_533082_gene
532985_534310_gene
534313_535428_gene
535517_536992_gene
537107_538285_gene
538358_539695_gene
539776_540945_gene
540905_542449_gene
542925_544196_gene
544546_545262_gene
545216_546070_gene
546028_547455_gene
547578_549938_gene
550052_550552_gene
550566_551585_gene
551331_551666_gene
551703_552155_gene
552152_552922_gene
552926_553330_gene
553352_554632_gene
554771_555892_gene
556665_557597_gene
557618_558406_gene
558434_559264_gene
559574_560422_gene
560931_563144_gene
563556_564326_gene
564280_564888_gene
564885_565352_gene
565504_566067_gene
566512_567138_gene
567168_567602_gene
567697_568848_gene
569140_569532_gene
569526_569873_gene
569875_571644_gene
571657_572379_gene
572413_575247_gene
575283_576512_gene
576519_577739_gene
577814_578689_gene
579103_579750_gene
580363_580734_gene
580406_580738_gene
580805_581194_gene
581844_583127_gene
583330_584814_gene
585004_585285_gene
585347_586294_gene
586260_586448_gene
586504_586674_gene
586676_587275_gene
587251_587850_gene
587834_589558_gene
589656_591872_gene
592083_592856_gene
592883_593203_gene
593345_594229_gene
594470_595537_gene
595977_596597_gene
596672_597496_gene
597907_599094_gene
599136_599534_gene
599794_600540_gene
600719_601465_gene
601595_601993_gene
602138_602494_gene
602739_603809_gene
603867_604484_gene
604481_605014_gene
605145_606578_gene
606769_608040_gene
611310_611660_gene
612151_612492_gene
612269_612550_gene
613387_613923_gene
613930_615294_gene
614238_614369_gene
615519_616499_gene
616597_616782_gene
616847_617326_gene
617366_618619_gene
618629_619300_gene
619488_620252_gene
620555_621118_gene
621102_621530_gene
621580_622473_gene
622587_622973_gene
623078_624589_gene
624654_624914_gene
625023_625397_gene
625407_625988_gene
626235_626420_gene
626434_627249_gene
627276_627971_gene
628114_630315_gene
630316_630735_gene
631254_633014_gene
633437_633898_gene
633891_635339_gene
635341_636093_gene
636090_637376_gene
637366_638610_gene
638607_639056_gene
639092_639463_gene
639466_640419_gene
640492_641406_gene
641653_642426_gene
642300_643607_gene
644249_645562_gene
645622_646668_gene
646869_647192_gene
647400_647804_gene
647840_648553_gene
648782_650032_gene
650436_651527_gene
651687_652259_gene
652576_652956_gene
653057_654031_gene
654121_655545_gene
655706_657649_gene
657760_658152_gene
658289_658666_gene
658819_660174_gene
660200_662407_gene
662485_662934_gene
662946_666464_gene
666468_666980_gene
666977_668044_gene
668041_668580_gene
668593_669300_gene
669522_670427_gene
670559_671908_gene
672196_673677_gene
673832_674497_gene
674545_675816_gene
675829_677112_gene
677109_678332_gene
678519_679067_gene
679051_680394_gene
680594_682168_gene
682215_683453_gene
683868_688331_gene
690883_692928_gene
693107_693706_gene
693821_695227_gene
696023_696805_gene
696777_697568_gene
697705_697932_gene
698059_699294_gene
699505_700797_gene
700778_702055_gene
702084_702902_gene
703073_704299_gene
704468_705658_gene
705669_706418_gene
706807_707664_gene
707667_709409_gene
709427_710548_gene
710548_711672_gene
711681_713120_gene
713454_715274_gene
715277_715930_gene
716146_716610_gene
716607_717386_gene
717379_718248_gene
718250_718468_gene
718254_718508_gene
718789_719871_gene
719987_722203_gene
722245_723009_gene
723047_723319_gene
723312_724625_gene
724645_725484_gene
725453_726280_gene
726557_726823_gene
726983_727747_gene
727873_730614_gene
730825_732093_gene
732160_732732_gene
732710_733651_gene
733666_734784_gene
734908_736314_gene
736392_737699_gene
737789_739579_gene
739735_740025_gene
740047_741699_gene
741822_742262_gene
742489_744636_gene
744892_746772_gene
746894_748714_gene
748803_753083_gene
753445_755214_gene
755316_758165_gene
758172_759884_gene
759971_762277_gene
762468_763319_gene
763337_764704_gene
764716_765390_gene
765484_766731_gene
766813_767841_gene
767884_769557_gene
769599_770210_gene
770320_770757_gene
770649_771182_gene
771222_772394_gene
772451_773413_gene
773426_774415_gene
774672_775481_gene
775439_776692_gene
776719_777414_gene
777414_779414_gene
779576_780667_gene
780630_781301_gene
781434_782447_gene
782548_783009_gene
783098_784345_gene
784467_787232_gene
787491_790538_gene
790655_791917_gene
792158_792562_gene
792628_793065_gene
793190_793501_gene
793529_794782_gene
794785_795252_gene
795382_795753_gene
795725_796702_gene
796792_797274_gene
797274_798326_gene
798318_799055_gene
799065_799703_gene
799869_801317_gene
801369_802979_gene
803263_806529_gene
805297_805401_gene
806788_807222_gene
807400_808782_gene
808784_809857_gene
809930_810379_gene
810597_811121_gene
811164_812417_gene
812529_812825_gene
812822_814372_gene
814524_815513_gene
816831_818339_gene
818378_819196_gene
819356_820738_gene
820735_821499_gene
821496_822137_gene
822150_822848_gene
822797_823867_gene
823867_825000_gene
824990_825598_gene
825609_827111_gene
827201_827764_gene
827765_828649_gene
828609_829688_gene
829724_831226_gene
831339_832256_gene
832277_833233_gene
833217_834221_gene
834336_834578_gene
834580_835104_gene
835678_837474_gene
837477_838595_gene
838606_839643_gene
839597_840688_gene
840701_841420_gene
841736_843253_gene
843474_845168_gene
845134_845985_gene
845982_847406_gene
847412_848560_gene
848574_849263_gene
849512_849700_gene
850246_851319_gene
851432_852325_gene
852319_853338_gene
853550_854257_gene
854762_855010_gene
855136_857118_gene
857281_858276_gene
858280_859017_gene
859099_860052_gene
860039_861340_gene
861690_862226_gene
862556_863731_gene
863728_865170_gene
865269_866645_gene
866844_867551_gene
867705_868976_gene
869088_869354_gene
869351_869698_gene
869667_870320_gene
870831_871481_gene
871761_872147_gene
872251_873594_gene
873669_875318_gene
875315_876685_gene
876838_878541_gene
878744_880447_gene
880677_881675_gene
881900_884287_gene
884529_885968_gene
885965_886807_gene
886804_887895_gene
887870_889285_gene
889377_889694_gene
889884_890927_gene
890905_891813_gene
891810_892289_gene
892225_892893_gene
893088_893786_gene
893884_895152_gene
895554_895889_gene
895915_898188_gene
898489_899574_gene
899600_899893_gene
900049_900828_gene
900831_902081_gene
902082_902456_gene
902587_903186_gene
903183_904097_gene
904094_905425_gene
905575_907299_gene
907250_907984_gene
908000_909919_gene
910055_910780_gene
910755_912098_gene
912191_913078_gene
913515_914291_gene
914284_915318_gene
915296_915874_gene
915908_916633_gene
916630_917139_gene
917120_917689_gene
917686_918237_gene
918227_919189_gene
919557_920354_gene
920347_921129_gene
921130_921606_gene
921614_922222_gene
922225_922506_gene
922896_923141_gene
923134_924402_gene
924399_925157_gene
925346_926023_gene
926020_927270_gene
927270_928286_gene
928676_929269_gene
929465_930880_gene
930924_931205_gene
931428_932408_gene
932373_933113_gene
933110_933790_gene
933968_934759_gene
934770_934901_gene
934907_935338_gene
935335_937287_gene
937284_937817_gene
937817_938218_gene
938166_938897_gene
939146_939550_gene
939745_940296_gene
940306_942132_gene
942246_943400_gene
943414_944193_gene
944196_945254_gene
945420_946286_gene
946510_948090_gene
948156_948581_gene
948674_950095_gene
950095_950391_gene
950384_951517_gene
951911_952465_gene
952719_953018_gene
953282_954424_gene
954486_955127_gene
955610_956044_gene
956168_956614_gene
956471_956806_gene
956741_957817_gene
958332_959612_gene
959936_961069_gene
961062_961892_gene
961896_962789_gene
962856_964007_gene
964156_966471_gene
966773_968122_gene
968328_969092_gene
969049_970419_gene
970769_971278_gene
971284_971661_gene
971743_972702_gene
972975_973706_gene
973918_974985_gene
974982_976550_gene
976937_977593_gene
977598_978500_gene
979029_980120_gene
980240_980785_gene
980995_981738_gene
981795_982292_gene
982309_982629_gene
982720_983421_gene
983508_983915_gene
983992_984549_gene
984836_985606_gene
985895_986005_gene
986179_986682_gene
986616_987620_gene
987677_987955_gene
988336_989997_gene
990018_991469_gene
991514_992566_gene
992563_993222_gene
993471_994118_gene
994158_995402_gene
995810_996559_gene
996573_997511_gene
997523_998644_gene
998716_1001100_gene
1001252_1002262_gene
1002679_1003743_gene
1003747_1004295_gene
1004273_1004908_gene
1004905_1005492_gene
1005496_1007592_gene
1008038_1008565_gene
1008552_1009661_gene
1009658_1011109_gene
1011218_1011649_gene
1011773_1012759_gene
1012872_1015667_gene
1015763_1016128_gene
1016427_1016990_gene
1017170_1019359_gene
1019601_1022726_gene
1022940_1023875_gene
1023865_1024554_gene
1024610_1025785_gene
1025948_1026838_gene
1027067_1027873_gene
1027860_1029677_gene
1029637_1030629_gene
1030958_1031632_gene
1031851_1032657_gene
1032669_1034111_gene
1034157_1035035_gene
1035062_1036729_gene
1036708_1040169_gene
1040246_1041508_gene
1041512_1042690_gene
1042687_1043592_gene
1043779_1045830_gene
1045932_1048115_gene
1048112_1049089_gene
1049086_1050459_gene
1050534_1053980_gene
1054066_1055307_gene
1055637_1056521_gene
1056482_1058029_gene
1058084_1059961_gene
1060107_1060700_gene
1061065_1062786_gene
1063227_1063967_gene
1064069_1065532_gene
1065913_1067058_gene
1067616_1068374_gene
1068446_1069525_gene
1069545_1070384_gene
1070520_1071026_gene
1071092_1071514_gene
1071615_1071863_gene
1072220_1072759_gene
1072751_1073674_gene
1073643_1074452_gene
1075236_1076102_gene
1076121_1078067_gene
1078064_1078393_gene
1078408_1078581_gene
1078587_1080140_gene
1080143_1081510_gene
1081520_1082494_gene
1082487_1085240_gene
1085247_1085570_gene
1085551_1086810_gene
1086807_1087643_gene
1087570_1088226_gene
1088219_1088581_gene
1088593_1088958_gene
1088955_1089221_gene
1089221_1089547_gene
1089557_1090189_gene
1090180_1090611_gene
1090611_1091432_gene
1091425_1092012_gene
1092009_1092422_gene
1092431_1092631_gene
1092625_1092978_gene
1092995_1093906_gene
1094785_1096029_gene
1096026_1097282_gene
1097289_1100441_gene
1100463_1102652_gene
1103657_1105564_gene
1105579_1105974_gene
1106003_1106200_gene
1106388_1106639_gene
1106700_1106873_gene
1106967_1107497_gene
1107779_1108663_gene
1109618_1112146_gene
1112133_1113392_gene
1113389_1114522_gene
1114601_1117744_gene
1117741_1119102_gene
1119060_1120613_gene
1120610_1121521_gene
1121779_1123989_gene
1124129_1125010_gene
1125147_1125521_gene
1125522_1126859_gene
1126856_1127824_gene
1127825_1131040_gene
1131037_1131489_gene
1131628_1131972_gene
1132175_1133854_gene
1133866_1134072_gene
1134218_1134745_gene
1134772_1137846_gene
1138084_1138551_gene
1138657_1138824_gene
1139067_1139384_gene
1139570_1139866_gene
1139872_1140537_gene
1140537_1141034_gene
1141102_1142019_gene
1141920_1142681_gene
1142681_1144654_gene
1144669_1144863_gene
1144897_1145286_gene
1145318_1146187_gene
1146245_1147717_gene
1147704_1148447_gene
1148453_1148641_gene
1148725_1149417_gene
1149420_1149698_gene
1149688_1150098_gene
1150107_1151531_gene
1151869_1152309_gene
1154000_1154542_gene
1154508_1156028_gene
1156198_1158000_gene
1158151_1158948_gene
1158966_1159229_gene
1159281_1159739_gene
1159897_1160925_gene
1161307_1162599_gene
1162604_1163122_gene
1163106_1163744_gene
1163707_1164264_gene
1164408_1164665_gene
1164677_1164880_gene
1164904_1165926_gene
1165936_1167117_gene
1167447_1167722_gene
1167775_1168695_gene
1168784_1169911_gene
1170029_1171213_gene
1171464_1171805_gene
1171592_1171864_gene
1172002_1173711_gene
1173776_1174147_gene
1174402_1174572_gene
1174611_1175966_gene
1176202_1177704_gene
1177925_1178332_gene
1178481_1179164_gene
1179250_1180281_gene
1180278_1181522_gene
1181858_1183306_gene
1183472_1185079_gene
1185394_1187199_gene
1187306_1187917_gene
1188292_1188813_gene
1189117_1189560_gene
1190100_1190813_gene
1191286_1194000_gene
1193984_1195243_gene
1195240_1196376_gene
1196391_1199543_gene
1199936_1201723_gene
1202264_1202455_gene
1202600_1203058_gene
1203181_1203783_gene
1204272_1205240_gene
1205522_1206385_gene
1206678_1207889_gene
1207933_1208925_gene
1209124_1209627_gene
1209726_1211000_gene
1211242_1211661_gene
1211847_1212728_gene
1212967_1215027_gene
1215532_1216227_gene
1216316_1216954_gene
1217235_1217618_gene
1217834_1218574_gene
1218657_1221026_gene
1221312_1222988_gene
1223381_1225732_gene
1225771_1226244_gene
1226336_1227451_gene
1227719_1228783_gene
1229115_1230881_gene
1231463_1232233_gene
1232861_1234189_gene
1234315_1235076_gene
1235312_1235902_gene
1236120_1236878_gene
1237161_1240622_gene
1240718_1242226_gene
1242309_1242773_gene
1243201_1244760_gene
1244889_1246340_gene
1246993_1248159_gene
1248174_1248554_gene
1248525_1248704_gene
1248771_1249823_gene
1249801_1250412_gene
1250582_1251484_gene
1252018_1252986_gene
1253246_1254268_gene
1254265_1255032_gene
1255029_1255853_gene
1255843_1256991_gene
1257167_1257397_gene
1257597_1258481_gene
1258828_1259334_gene
1259593_1261902_gene
1262032_1263513_gene
1263574_1264077_gene
1264367_1265878_gene
1266056_1266838_gene
1266926_1268005_gene
1268082_1269605_gene
1269764_1270720_gene
1270620_1272107_gene
1272593_1273675_gene
1273915_1275594_gene
1275652_1276848_gene
1277254_1278018_gene
1278130_1278900_gene
1279271_1280308_gene
1280410_1280655_gene
1280973_1281635_gene
1281791_1282522_gene
1282693_1283979_gene
1283991_1285145_gene
1285388_1286185_gene
1286250_1288262_gene
1288486_1289007_gene
1289130_1291397_gene
1291551_1292912_gene
1292948_1294042_gene
1294101_1294520_gene
1294669_1296156_gene
1296252_1297838_gene
1297835_1299163_gene
1300274_1301209_gene
1301488_1302936_gene
1302987_1304060_gene
1304045_1304659_gene
1304656_1305864_gene
1305872_1306339_gene
1306465_1308102_gene
1308099_1308923_gene
1309096_1310988_gene
1311080_1313467_gene
1313842_1314624_gene
1314772_1315716_gene
1315828_1317723_gene
1317730_1318731_gene
1318791_1319963_gene
1320049_1321236_gene
1321346_1322101_gene
1322190_1322813_gene
1322810_1323577_gene
1323571_1324290_gene
1324284_1324883_gene
1324880_1325938_gene
1325916_1327010_gene
1327011_1328306_gene
1328312_1329250_gene
1329862_1331394_gene
1331410_1332546_gene
1332772_1333404_gene
1333647_1333886_gene
1334396_1334968_gene
1335128_1335583_gene
1335613_1336032_gene
1336110_1336898_gene
1336859_1337443_gene
1337473_1338144_gene
1338388_1339359_gene
1339417_1339980_gene
1340222_1341529_gene
1341674_1342624_gene
1342824_1343216_gene
1343219_1343641_gene
1343653_1344330_gene
1344444_1345757_gene
1345768_1346514_gene
1346661_1347446_gene
1347459_1348151_gene
1348109_1349293_gene
1349296_1350180_gene
1350230_1352179_gene
1352183_1353418_gene
1353613_1355409_gene
1355802_1356863_gene
1356847_1358064_gene
1358462_1359130_gene
1359266_1359772_gene
1359759_1361036_gene
1361650_1362450_gene
1362988_1364187_gene
1364344_1364772_gene
1364928_1366178_gene
1366153_1366905_gene
1367039_1368013_gene
1368030_1368293_gene
1368280_1368645_gene
1368713_1371382_gene
1371547_1372626_gene
1372685_1373398_gene
1373487_1374296_gene
1374382_1376457_gene
1376276_1377313_gene
1377282_1378373_gene
1378370_1379122_gene
1379119_1379835_gene
1379832_1380872_gene
1380876_1381271_gene
1381268_1381414_gene
1381429_1382139_gene
1382136_1384616_gene
1384603_1384833_gene
1384984_1385094_gene
1385181_1385384_gene
1385397_1385870_gene
1385725_1386591_gene
1386688_1387428_gene
1387521_1387910_gene
1388172_1388510_gene
1388724_1389992_gene
1390448_1391935_gene
1392035_1393354_gene
1393322_1394122_gene
1394907_1395554_gene
1395801_1396625_gene
1397311_1399347_gene
1399280_1399738_gene
1400011_1400796_gene
1401419_1402483_gene
1402531_1402986_gene
1403064_1403348_gene
1403689_1405320_gene
1405541_1407367_gene
1407450_1407767_gene
1407804_1408175_gene
1408223_1409947_gene
1410027_1410410_gene
1410413_1411168_gene
1411187_1411930_gene
1411962_1413041_gene
1413144_1414394_gene
1414540_1415283_gene
1415283_1415807_gene
1415804_1416403_gene
1416453_1416773_gene
1416806_1418392_gene
1418676_1420091_gene
1420088_1420765_gene
1420826_1421371_gene
1421614_1423053_gene
1423168_1423932_gene
1423936_1424799_gene
1425272_1426126_gene
1426213_1426413_gene
1426682_1429123_gene
1429177_1429644_gene
1429644_1430942_gene
1431186_1431974_gene
1431975_1432598_gene
1432600_1433799_gene
1433825_1434643_gene
1434640_1436295_gene
1436305_1437675_gene
1437841_1439760_gene
1439890_1440204_gene
1440088_1440381_gene
1440128_1440397_gene
1440709_1444116_gene
1444211_1444390_gene
1444970_1445260_gene
1445315_1446064_gene
1446245_1447267_gene
1447359_1448246_gene
1448796_1450778_gene
1450911_1452395_gene
1452399_1454774_gene
1454875_1455975_gene
1455996_1458131_gene
1458245_1459405_gene
1459402_1460616_gene
1460609_1462408_gene
1462484_1463569_gene
1463957_1464271_gene
1464351_1466816_gene
1466869_1468038_gene
1468603_1470003_gene
1469996_1470721_gene
1470711_1471676_gene
1471676_1473019_gene
1473056_1474354_gene
1474594_1475340_gene
1475663_1476073_gene
1476083_1477708_gene
1477771_1478052_gene
1478135_1479562_gene
1479974_1480858_gene
1480839_1482125_gene
1482122_1482892_gene
1482895_1483428_gene
1483403_1484038_gene
1484026_1485051_gene
1485053_1485544_gene
1485646_1488117_gene
1488183_1489718_gene
1489825_1490961_gene
1490971_1492491_gene
1492611_1494980_gene
1494996_1496180_gene
1496281_1497456_gene
1497609_1500533_gene
1501020_1502150_gene
1502289_1504667_gene
1504982_1505950_gene
1505937_1506554_gene
1506551_1506928_gene
1506925_1507479_gene
1507397_1507819_gene
1507923_1509122_gene
1509219_1510628_gene
1510641_1511201_gene
1511214_1511987_gene
1512004_1512906_gene
1513119_1514696_gene
1514897_1516768_gene
1516880_1517176_gene
1517292_1518446_gene
1518433_1519395_gene
1519616_1520191_gene
1520302_1521420_gene
1521417_1523297_gene
1523437_1523907_gene
1523916_1524254_gene
1524359_1525801_gene
1526021_1527688_gene
1527615_1529222_gene
1529236_1530639_gene
1530636_1531445_gene
1531442_1531873_gene
1531824_1532579_gene
1532786_1533163_gene
1533360_1533833_gene
1533945_1535354_gene
1535420_1535812_gene
1535948_1537033_gene
1537306_1537734_gene
1537820_1538011_gene
1538017_1539045_gene
1539042_1539995_gene
1540022_1540969_gene
1540981_1541727_gene
1541812_1542060_gene
1542080_1543318_gene
1543319_1544317_gene
1544317_1544955_gene
1544952_1545857_gene
1545984_1546325_gene
1546357_1547169_gene
1547281_1548381_gene
1548437_1549729_gene
1549805_1551085_gene
1551307_1552482_gene
1552519_1553904_gene
1553994_1555145_gene
1555198_1555968_gene
1556214_1556810_gene
1557151_1557861_gene
1557870_1558232_gene
1558192_1559712_gene
1559774_1561249_gene
1561343_1562614_gene
1562840_1563721_gene
1563781_1566396_gene
1566371_1567477_gene
1567483_1568784_gene
1568781_1569476_gene
1569479_1571218_gene
1571331_1571621_gene
1571668_1572837_gene
1573101_1574216_gene
1574217_1574906_gene
1575093_1577747_gene
1577692_1578471_gene
1578477_1578965_gene
1579078_1579614_gene
1579611_1580459_gene
1580593_1580991_gene
1581071_1582867_gene
1582897_1583661_gene
1583658_1584497_gene
1584510_1584905_gene
1584944_1585762_gene
1585925_1587319_gene
1587285_1587965_gene
1587973_1588863_gene
1588823_1589299_gene
1589296_1590246_gene
1590516_1591364_gene
1591316_1591981_gene
1592224_1593441_gene
1593441_1594232_gene
1594225_1594815_gene
1594805_1595551_gene
1595787_1596572_gene
1596957_1599569_gene
1599656_1600648_gene
1600790_1601101_gene
1601435_1602322_gene
1602449_1602967_gene
1603092_1604477_gene
1604506_1605762_gene
1605883_1607217_gene
1607223_1609427_gene
1609468_1609833_gene
1609892_1611085_gene
1611090_1611899_gene
1611889_1613628_gene
1613697_1614701_gene
1614784_1617492_gene
1617735_1617893_gene
1618097_1618927_gene
1618972_1619718_gene
1619956_1620579_gene
1620533_1621006_gene
1621003_1622601_gene
1622738_1624399_gene
1624710_1626092_gene
1626117_1627064_gene
1627065_1628210_gene
1628191_1628910_gene
1628907_1629545_gene
1629680_1629994_gene
1629991_1630620_gene
1630639_1632420_gene
1632395_1635343_gene
1635309_1635980_gene
1636053_1637093_gene
1637292_1638128_gene
1638274_1639863_gene
1639917_1640726_gene
1640925_1641326_gene
1641412_1641933_gene
1642053_1642583_gene
1642834_1645431_gene
1645642_1646673_gene
1646838_1648163_gene
1648274_1649515_gene
1649569_1650591_gene
1650736_1650954_gene
1650968_1651390_gene
1651437_1651730_gene
1652066_1653862_gene
1654079_1656781_gene
1656922_1657860_gene
1657932_1658474_gene
1658523_1659224_gene
1659724_1660188_gene
1660524_1661963_gene
1662037_1663689_gene
1663729_1666410_gene
1666420_1666809_gene
1666848_1667627_gene
1667605_1668777_gene
1669097_1669918_gene
1670045_1671337_gene
1671350_1672186_gene
1672453_1673052_gene
1673062_1675098_gene
1675215_1675829_gene
1675884_1676615_gene
1676654_1678285_gene
1678273_1678854_gene
1678858_1679994_gene
1680081_1682630_gene
1682632_1683201_gene
1683244_1683570_gene
1683753_1684496_gene
1684755_1686479_gene
1686485_1687705_gene
1687745_1688614_gene
1688628_1689866_gene
1689941_1690534_gene
1690550_1691005_gene
1691139_1691954_gene
1692079_1693551_gene
1693529_1694647_gene
1694853_1695644_gene
1695724_1697724_gene
1697717_1699333_gene
1699656_1700957_gene
1701368_1701544_gene
1701541_1701963_gene
1701966_1702697_gene
1702965_1704275_gene
1704272_1704697_gene
1704752_1705174_gene
1705239_1706627_gene
1706632_1707795_gene
1707811_1708485_gene
1708503_1709783_gene
1709773_1710342_gene
1710317_1711099_gene
1711279_1712439_gene
1712448_1712924_gene
1713008_1713892_gene
1713954_1714589_gene
1714678_1715424_gene
1715421_1716149_gene
1716146_1716856_gene
1716913_1718622_gene
1718670_1719407_gene
1719561_1719968_gene
1720057_1721379_gene
1721538_1722632_gene
1722625_1723599_gene
1723602_1724714_gene
1724886_1727105_gene
1727278_1729422_gene
1729478_1730197_gene
1730285_1731028_gene
1731264_1732214_gene
1732217_1733287_gene
1733483_1734274_gene
1734250_1735737_gene
1735718_1736857_gene
1736886_1737743_gene
1737722_1738981_gene
1738987_1739985_gene
1739982_1740437_gene
1740446_1741135_gene
1741148_1741543_gene
1741547_1742578_gene
1742704_1743267_gene
1743361_1743810_gene
1744048_1745106_gene
1745137_1745685_gene
1745706_1750583_gene
1750635_1751075_gene
1751110_1752498_gene
1752829_1753596_gene
1753919_1754407_gene
1754534_1754911_gene
1754935_1755492_gene
1755600_1757618_gene
1757827_1758276_gene
1758289_1759236_gene
1759202_1759429_gene
1759443_1759781_gene
1760090_1760287_gene
1760298_1761188_gene
1761225_1761959_gene
1762019_1764037_gene
1764030_1765349_gene
1765512_1766573_gene
1766723_1766929_gene
1766981_1768267_gene
1768731_1770155_gene
1770226_1770903_gene
1770905_1771384_gene
1771492_1772151_gene
1772377_1774704_gene
1774858_1775340_gene
1775391_1776644_gene
1776653_1777723_gene
1778154_1779101_gene
1779352_1780104_gene
1780170_1780697_gene
1780694_1781650_gene
1781654_1783435_gene
1783428_1784888_gene
1785236_1786108_gene
1786233_1787075_gene
1787083_1788993_gene
1788993_1789433_gene
1789603_1790922_gene
1791042_1791815_gene
1791933_1792964_gene
1793220_1794203_gene
1794227_1794619_gene
1794864_1797071_gene
1797226_1798140_gene
1798234_1799544_gene
1799502_1800338_gene
1800317_1801303_gene
1801305_1802288_gene
1802420_1803601_gene
1803601_1804257_gene
1804345_1807347_gene
1807502_1808041_gene
1808095_1808943_gene
1808947_1809837_gene
1809954_1811267_gene
1811280_1812596_gene
1812687_1813244_gene
1813262_1815241_gene
1815442_1816695_gene
1816951_1818279_gene
1818391_1819155_gene
1819383_1819958_gene
1819958_1820488_gene
1820492_1821091_gene
1821113_1821370_gene
1821492_1822394_gene
1822391_1824262_gene
1824301_1826187_gene
1826195_1827199_gene
1827202_1828617_gene
1829032_1830150_gene
1830346_1832019_gene
1832061_1833014_gene
1833166_1833933_gene
1833912_1835249_gene
1835379_1836422_gene
1836560_1838041_gene
1838135_1839253_gene
1839414_1840010_gene
1840168_1840674_gene
1840733_1843051_gene
1843217_1848982_gene
1849247_1850650_gene
1850812_1852203_gene
1852351_1853235_gene
1854141_1856366_gene
1856669_1857559_gene
1857651_1859780_gene
1859777_1860355_gene
1860352_1861671_gene
1861668_1863167_gene
1863190_1864185_gene
1864151_1865413_gene
1865410_1866486_gene
1866453_1868795_gene
1868948_1869661_gene
1870228_1871607_gene
1871705_1872022_gene
1872119_1872970_gene
1873124_1874632_gene
1874936_1876333_gene
1876344_1877213_gene
1877432_1877749_gene
1877800_1879002_gene
1879039_1880283_gene
1880467_1881093_gene
1881178_1883853_gene
1884118_1885512_gene
1885806_1887116_gene
1887061_1887339_gene
1887472_1887846_gene
1887731_1888036_gene
1888202_1891366_gene
1891911_1892588_gene
1893014_1893385_gene
1893413_1894105_gene
1894092_1894811_gene
1895076_1896758_gene
1896894_1898534_gene
1898621_1899916_gene
1899877_1900431_gene
1900567_1901790_gene
1901787_1902830_gene
1902841_1904331_gene
1904337_1905683_gene
1905680_1906420_gene
1906498_1906863_gene
1907241_1907798_gene
1907788_1908531_gene
1908528_1909427_gene
1909472_1910287_gene
1910570_1910980_gene
1911490_1911948_gene
1912012_1913700_gene
1914091_1915728_gene
1915872_1916636_gene
1916623_1919208_gene
1919230_1919655_gene
1919670_1921247_gene
1921250_1922722_gene
1922931_1923761_gene
1924342_1926828_gene
1926921_1927706_gene
1927703_1928620_gene
1928571_1929662_gene
1929662_1930432_gene
1930486_1931364_gene
1931484_1932485_gene
1932659_1933942_gene
1933935_1936091_gene
1936350_1936652_gene
1936655_1938106_gene
1938110_1939543_gene
1939747_1940736_gene
1940874_1943180_gene
1943220_1943684_gene
1943704_1944492_gene
1944499_1944945_gene
1945064_1945351_gene
1945747_1946115_gene
1946120_1946503_gene
1946500_1947663_gene
1947638_1948411_gene
1948527_1949312_gene
1949425_1950381_gene
1950470_1953046_gene
1953138_1954448_gene
1954461_1955108_gene
1955401_1956768_gene
1956770_1957390_gene
1957443_1961264_gene
1961254_1961709_gene
1961706_1963058_gene
1963058_1963696_gene
1963838_1964827_gene
1964830_1966464_gene
1966636_1966950_gene
1966965_1968326_gene
1968302_1969333_gene
1969632_1970936_gene
1970952_1971566_gene
1971563_1973947_gene
1973921_1974970_gene
1974973_1975641_gene
1975696_1976067_gene
1976198_1976419_gene
1976586_1978001_gene
1977990_1978766_gene
1979015_1979965_gene
1980237_1983065_gene
1983037_1984182_gene
1984497_1984982_gene
1985069_1986559_gene
1986556_1987563_gene
1987723_1988124_gene
1988121_1988942_gene
1988899_1989672_gene
1989682_1990470_gene
1990495_1991382_gene
1991351_1992511_gene
1992531_1994609_gene
1994606_1995757_gene
1995754_1996524_gene
1996528_1996797_gene
1996806_1997555_gene
1997556_1997966_gene
1997963_1998292_gene
1998302_1999369_gene
1999808_2000062_gene
2000166_2001461_gene
2001413_2002180_gene
2002200_2003207_gene
2004190_2005470_gene
2005655_2006851_gene
2007376_2009958_gene
2009976_2010371_gene
2010421_2011467_gene
2011392_2011712_gene
2011770_2012705_gene
2012997_2013491_gene
2014053_2016650_gene
2016663_2018351_gene
2018348_2020888_gene
2020922_2021917_gene
2022054_2022446_gene
2022744_2024222_gene
2024508_2027087_gene
2027092_2030322_gene
2030529_2031602_gene
2031718_2032272_gene
2032320_2033210_gene
2033353_2034642_gene
2034644_2035651_gene
2035596_2036567_gene
2036567_2038360_gene
2038420_2039226_gene
2039223_2040389_gene
2040510_2041529_gene
2041557_2042243_gene
2042569_2043738_gene
2043750_2044934_gene
2045066_2045386_gene
2045396_2047003_gene
2046969_2047817_gene
2047741_2049774_gene
2049785_2050693_gene
2050790_2052790_gene
2052959_2053375_gene
2053752_2054852_gene
2054830_2055477_gene
2055478_2056269_gene
2056349_2057767_gene
2058256_2058987_gene
2058990_2059520_gene
2059526_2061592_gene
2061582_2062505_gene
2062722_2063507_gene
2063715_2065907_gene
2066101_2067060_gene
2067054_2067491_gene
2067708_2068490_gene
2068599_2069561_gene
2069558_2070853_gene
2071231_2072127_gene
2072131_2072412_gene
2072399_2072749_gene
2072773_2073435_gene
2073781_2075442_gene
2075411_2076133_gene
2076229_2077035_gene
2077573_2079447_gene
2079705_2080007_gene
2080112_2082562_gene
2082800_2084080_gene
2084215_2084859_gene
2084862_2086193_gene
2087055_2088281_gene
2088377_2090254_gene
2090282_2090956_gene
2090946_2091338_gene
2091350_2092132_gene
2092213_2094045_gene
2094213_2095256_gene
2095331_2096470_gene
2096467_2096937_gene
2097042_2097575_gene
2097822_2099174_gene
2099864_2100958_gene
2101020_2101460_gene
2101695_2102222_gene
2102459_2103676_gene
2103996_2104310_gene
2104447_2104722_gene
2104879_2105232_gene
2105414_2106745_gene
2106974_2107939_gene
2108003_2109724_gene
2109800_2110102_gene
2110192_2110575_gene
2110585_2111865_gene
2112309_2113622_gene
2113708_2114232_gene
2114494_2114973_gene
2114993_2116798_gene
2116840_2117754_gene
2117778_2118701_gene
2118701_2120689_gene
2120771_2121958_gene
2122066_2122392_gene
2122839_2123741_gene
2123771_2124673_gene
2124889_2126070_gene
2126075_2126608_gene
2126619_2128424_gene
2128741_2129352_gene
2129542_2130546_gene
2130578_2131840_gene
2132087_2133571_gene
2133598_2136330_gene
2136427_2137671_gene
2137668_2138096_gene
2138278_2138700_gene
2138991_2139308_gene
2139383_2140804_gene
2140935_2142365_gene
2142611_2143363_gene
2143360_2143539_gene
2143532_2144203_gene
2144181_2146181_gene
2146127_2146462_gene
2146745_2149537_gene
2149854_2152499_gene
2152569_2153132_gene
2153208_2153477_gene
2153489_2154415_gene
2154720_2155871_gene
2156663_2157406_gene
2157782_2158096_gene
2158158_2158772_gene
2158922_2160232_gene
2160204_2160485_gene
2160726_2162618_gene
2162633_2163694_gene
2164322_2165803_gene
2166115_2167431_gene
2167602_2169122_gene
2169139_2170266_gene
2170297_2171151_gene
2171262_2171519_gene
2171659_2172705_gene
2172886_2173869_gene
2173974_2174645_gene
2174909_2175658_gene
2175670_2176677_gene
2176986_2178326_gene
2178619_2179743_gene
2180075_2180950_gene
2180947_2181756_gene
2181810_2184092_gene
2184483_2185058_gene
2185359_2186648_gene
2186648_2187751_gene
2187982_2189373_gene
2189637_2191265_gene
2191518_2193512_gene
2193697_2194470_gene
2194507_2196039_gene
2196167_2196733_gene
2196799_2198898_gene
2199220_2200530_gene
2200794_2203760_gene
2204165_2205730_gene
2206539_2207105_gene
2207148_2207912_gene
2208464_2210371_gene
2210715_2211338_gene
2211372_2211791_gene
2212015_2212392_gene
2212856_2213098_gene
2213603_2214496_gene
2214817_2215467_gene
2215443_2216303_gene
2216481_2217077_gene
2217148_2219082_gene
2219318_2220685_gene
2220682_2220984_gene
2221158_2221454_gene
2221477_2222520_gene
2222680_2223885_gene
2223905_2224642_gene
2224682_2225995_gene
2226164_2229016_gene
2229193_2229660_gene
2229735_2230280_gene
2230379_2230795_gene
2230973_2231707_gene
2231815_2232465_gene
2232545_2233093_gene
2233519_2234397_gene
2234514_2235707_gene
2235817_2236374_gene
2236371_2237177_gene
2237116_2237430_gene
2237572_2238699_gene
2238736_2239077_gene
2239250_2240167_gene
2240180_2242036_gene
2242058_2242393_gene
2242539_2243372_gene
2243419_2244468_gene
2244549_2244962_gene
2245044_2246900_gene
2246958_2247449_gene
2247452_2247838_gene
2247838_2249985_gene
2250383_2251012_gene
2251018_2251884_gene
2252185_2252892_gene
2253222_2254256_gene
2254420_2255115_gene
2255112_2255900_gene
2256245_2256820_gene
2256868_2257482_gene
2257496_2257777_gene
2257930_2259618_gene
2259750_2260763_gene
2260881_2262206_gene
2262225_2263373_gene
2263582_2264706_gene
2264790_2265929_gene
2266119_2268068_gene
2268198_2268800_gene
2269077_2270414_gene
2270563_2271624_gene
2271861_2272199_gene
2272239_2272937_gene
2272934_2274703_gene
2274807_2275943_gene
2276012_2278084_gene
2278577_2279740_gene
2279856_2280614_gene
2280607_2281209_gene
2281241_2282509_gene
2282734_2283003_gene
2283016_2283897_gene
2283884_2284852_gene
2284849_2285502_gene
2285499_2286467_gene
2286464_2286994_gene
2287092_2287694_gene
2287698_2288621_gene
2288651_2289388_gene
2289389_2290513_gene
2290607_2291458_gene
2291585_2291884_gene
2292022_2293080_gene
2293248_2294276_gene
2294267_2295565_gene
2295562_2296440_gene
2296937_2297941_gene
2297854_2298156_gene
2298566_2299189_gene
2299553_2300860_gene
2300843_2302048_gene
2302092_2302862_gene
2303373_2305139_gene
2305136_2306944_gene
2307026_2307868_gene
2307879_2308379_gene
2308402_2309184_gene
2309199_2309576_gene
2309882_2311333_gene
2311404_2312924_gene
2312884_2313354_gene
2313772_2314146_gene
2314344_2315951_gene
2315954_2316583_gene
2316456_2317292_gene
2317885_2318976_gene
2319208_2325153_gene
2325174_2327066_gene
2327599_2330328_gene
2330325_2331710_gene
2331707_2332129_gene
2332119_2332901_gene
2332894_2334705_gene
2334705_2335376_gene
2335389_2336384_gene
2336381_2336989_gene
2337314_2339911_gene
2339878_2340228_gene
[truncated: 1,048 more rows]

## Sheet: raw data
	1	2	3	4	5	6	7	8	9	10	11	12	13	14	15	16
	Gene	t10_1_unique_bowtie.out	t10_2_unique_bowtie.out	t10_unique_bowtie.out	t11_1_unique_bowtie.out	t11_2_unique_bowtie.out	t11_unique_bowtie.out	t12_1_unique_bowtie.out	t12_2_unique_bowtie.out	t12_unique_bowtie.out	t14_1_unique_bowtie.out	t14_2_unique_bowtie.out	t14_unique_bowtie.out	t7_1_unique_bowtie.out	t7_2_unique_bowtie.out	t7_unique_bowtie.out
	238464_238634_gene	0	0	0	0	0	0	0	0	0	0	0	0	0	0	0		0
	506479_506718_gene	0	0	0	0	0	0	0	0	0	0	0	0	0	0	0		0
	519971_520132_gene	0	0	0	0	0	0	0	0	0	0	0	0	0	0	0		0
	122311_122415_gene	0	0	0	0	0	0	0	0	0	0	0	0	0	0	0		0
	2470888_2471040_gene	0	0	0	0	0	0	0	0	0	0	0	0	0	0	0		0
	1138657_1138824_gene	0	0	0	0	0	0	0	0	0	0	0	0	0	1	1		1
	2705410_2705643_gene	0	0	0	0	0	0	0	1	1	0	0	0	0	0	0		1
	2896977_2897183_gene	0	0	0	0	0	0	0	0	0	1	0	1	0	0	0		1
	220962_221183_gene	0	0	0	0	0	0	0	0	0	0	0	0	0	1	1		1
	431782_431895_gene	0	1	1	0	0	0	0	0	0	0	0	0	0	0	0		1
	2351789_2351935_gene	0	0	0	0	0	0	0	0	0	0	0	0	0	1	1		1
	194901_195011_gene	0	0	0	0	0	0	0	0	0	0	0	0	2	0	2		2
	805297_805401_gene	0	0	0	0	0	0	0	0	0	0	0	0	1	1	2		2
	1381268_1381414_gene	0	1	1	0	0	0	0	1	1	0	0	0	0	0	0		2
	2352127_2352303_gene	1	0	1	0	0	0	0	0	0	0	0	0	1	0	1		2
	409033_409140_gene	0	1	1	0	0	0	0	0	0	0	0	0	0	1	1		2
	223101_223295_gene	0	1	1	0	0	0	0	0	0	0	0	0	1	0	1		2
	1384984_1385094_gene	1	1	2	0	0	0	0	0	0	0	0	0	0	0	0		2
	408711_409034_gene	2	0	2	0	0	0	0	0	0	0	0	0	0	1	1		3
	1078064_1078393_gene	0	0	0	1	0	1	0	0	0	0	0	0	0	2	2		3
	1092625_1092978_gene	0	0	0	0	0	0	0	1	1	0	1	1	0	1	1		3
	2220682_2220984_gene	0	1	1	0	0	0	1	1	2	0	0	0	0	1	1		4
	2312884_2313354_gene	0	1	1	0	0	0	0	1	1	1	0	1	0	1	1		4
	2439703_2439775_gene	0	1	1	0	0	0	0	0	0	1	0	1	0	2	2		4
	1091425_1092012_gene	0	0	0	0	0	0	3	0	3	0	0	0	1	1	2		5
	2374428_2374697_gene	0	1	1	0	1	1	1	0	1	0	0	0	1	1	2		5
	2221158_2221454_gene	0	0	0	0	1	1	0	1	1	0	0	0	1	2	3		5
	1092431_1092631_gene	0	1	1	0	0	0	0	1	1	1	0	1	0	2	2		5
	1090180_1090611_gene	0	1	1	1	0	1	0	0	0	0	0	0	1	3	4		6
	1171592_1171864_gene	1	0	1	0	0	0	0	0	0	0	0	0	1	4	5		6
	3381904_3382047_gene	0	1	1	0	0	0	0	0	0	1	0	1	3	1	4		6
	2344000_2344884_gene	1	0	1	0	0	0	0	1	1	0	0	0	4	1	5		7
	1444211_1444390_gene	0	0	0	1	1	2	0	0	0	0	0	0	4	1	5		7
	1440088_1440381_gene	2	1	3	0	0	0	1	0	1	0	0	0	2	1	3		7
	1248525_1248704_gene	2	0	2	1	0	1	0	1	1	0	0	0	1	2	3		7
	614238_614369_gene	0	1	1	0	0	0	2	0	2	0	0	0	4	0	4		7
	1089221_1089547_gene	0	0	0	1	0	1	3	1	4	0	0	0	0	2	2		7
	985895_986005_gene	0	0	0	0	0	0	1	1	2	0	0	0	3	2	5		7
	1092009_1092422_gene	0	1	1	0	0	0	0	3	3	0	0	0	0	4	4		8
	1177925_1178332_gene	2	0	2	1	0	1	0	1	1	0	0	0	2	2	4		8
	2667931_2668007_gene	2	2	4	0	0	0	1	1	2	1	0	1	1	0	1		8
	1462484_1463569_gene	0	0	0	0	0	0	0	0	0	0	2	2	4	2	6		8
	1167447_1167722_gene	0	2	2	0	0	0	1	0	1	0	1	1	2	2	4		8
	2428294_2428959_gene	1	0	1	3	1	4	0	0	0	0	0	0	1	3	4		9
	1073643_1074452_gene	2	2	4	0	0	0	0	1	1	0	0	0	2	2	4		9
	200453_201019_gene	0	0	0	0	0	0	1	1	2	3	0	3	3	1	4		9
	1650736_1650954_gene	0	2	2	0	0	0	1	1	2	0	0	0	3	2	5		9
	1085247_1085570_gene	0	0	0	0	1	1	4	3	7	1	0	1	1	0	1		10
	2896086_2896763_gene	2	1	3	0	0	0	2	1	3	1	0	1	0	3	3		10
	2158158_2158772_gene	0	1	1	2	0	2	0	0	0	1	0	1	1	5	6		10
	191460_191939_gene	0	1	1	0	2	2	0	0	0	1	0	1	1	5	6		10
	871492_871578_gene	3	6	9	0	0	0	0	0	0	0	0	0	1	0	1		10
	2369804_2369977_gene	2	3	5	1	1	2	0	0	0	0	0	0	1	3	4		11
	2703828_2704712_gene	0	1	1	0	1	1	0	0	0	0	0	0	2	7	9		11
	1403064_1403348_gene	0	0	0	3	0	3	0	2	2	3	1	4	0	3	3		12
	567168_567602_gene	1	2	3	0	0	0	0	1	1	1	1	2	4	2	6		12
	956471_956806_gene	2	1	3	0	1	1	0	1	1	1	0	1	1	5	6		12
	227034_228308_gene	2	0	2	1	0	1	4	0	4	0	0	0	1	4	5		12
	1089557_1090189_gene	0	0	0	0	0	0	1	0	1	1	0	1	7	4	11		13
	1380876_1381271_gene	0	2	2	0	0	0	2	4	6	0	1	1	2	2	4		13
	194022_194303_gene	0	0	0	2	0	2	1	2	3	2	0	2	2	4	6		13
	2753317_2753505_gene	0	1	1	0	0	0	0	3	3	2	0	2	3	4	7		13
	438107_438241_gene	2	0	2	0	0	0	0	0	0	0	0	0	5	7	12		14
	1144669_1144863_gene	4	1	5	0	0	0	2	2	4	2	0	2	1	2	3		14
	1086807_1087643_gene	3	1	4	1	1	2	1	3	4	0	1	1	2	1	3		14
	1468219_1468295_gene	3	2	5	0	0	0	1	0	1	2	2	4	0	4	4		14
	3068032_3068319_gene	2	1	3	0	0	0	2	2	4	0	1	1	3	3	6		14
	1999808_2000062_gene	0	2	2	0	0	0	2	3	5	2	3	5	1	1	2		14
	1092995_1093906_gene	1	2	3	1	0	1	3	0	3	0	0	0	4	3	7		14
	566133_566209_gene	4	5	9	0	0	0	0	0	0	1	0	1	2	2	4		14
	2184483_2185058_gene	2	2	4	1	0	1	3	1	4	1	1	2	1	3	4		15
	1384603_1384833_gene	1	5	6	2	1	3	3	1	4	1	0	1	1	0	1		15
	1877432_1877749_gene	2	1	3	0	0	0	2	1	3	3	0	3	2	4	6		15
	647400_647804_gene	3	0	3	0	3	3	1	0	1	2	0	2	1	5	6		15
	1069545_1070384_gene	0	1	1	2	0	2	1	0	1	1	0	1	5	6	11		16
	2759412_2759897_gene	7	7	14	0	0	0	0	0	0	0	0	0	1	1	2		16
	2568100_2568651_gene	2	2	4	2	1	3	0	1	1	0	1	1	4	3	7		16
	1090611_1091432_gene	0	1	1	1	1	2	2	1	3	0	0	0	7	3	10		16
	2683228_2683401_gene	1	3	4	0	0	0	0	1	1	1	0	1	7	3	10		16
	2362653_2363213_gene	1	1	2	1	0	1	0	0	0	2	0	2	3	8	11		16
	1385181_1385384_gene	4	3	7	0	0	0	3	1	4	1	0	1	0	5	5		17
	2847611_2847790_gene	1	1	2	0	0	0	4	7	11	1	0	1	3	1	4		18
	2154466_2154541_gene	3	5	8	0	0	0	3	2	5	1	0	1	2	2	4		18
	1387521_1387910_gene	6	7	13	1	0	1	0	0	0	1	0	1	0	3	3		18
	1088955_1089221_gene	3	2	5	2	0	2	0	1	1	4	1	5	4	2	6		19
	2374202_2374498_gene	2	0	2	1	0	1	0	4	4	1	1	2	3	7	10		19
	1087570_1088226_gene	0	2	2	1	1	2	2	5	7	3	1	4	2	2	4		19
	586504_586674_gene	7	5	12	0	0	0	0	1	1	0	0	0	2	5	7		20
	2435166_2435807_gene	3	0	3	0	0	0	5	3	8	2	0	2	3	4	7		20
	174882_175442_gene	5	4	9	1	2	3	0	0	0	1	1	2	4	2	6		20
	551331_551666_gene	4	1	5	0	0	0	0	0	0	0	0	0	9	6	15		20
	2373532_2374194_gene	3	3	6	0	0	0	5	0	5	0	0	0	6	4	10		21
	1081520_1082494_gene	7	4	11	0	0	0	0	0	0	3	0	3	2	5	7		21
	2390645_2391163_gene	5	3	8	0	1	1	0	0	0	1	0	1	8	3	11		21
	2331707_2332129_gene	0	3	3	0	1	1	5	3	8	4	0	4	2	3	5		21
	1106388_1106639_gene	2	3	5	1	1	2	0	0	0	1	1	2	5	7	12		21
	2683004_2683231_gene	4	2	6	0	1	1	0	0	0	2	1	3	6	5	11		21
	1533360_1533833_gene	2	0	2	1	0	1	2	1	3	9	1	10	4	1	5		21
	385874_386176_gene	1	6	7	0	0	0	1	3	4	0	0	0	3	8	11		22
	1642053_1642583_gene	3	1	4	0	2	2	1	3	4	1	0	1	9	3	12		23
	1106003_1106200_gene	0	2	2	1	0	1	4	8	12	5	0	5	1	2	3		23
	2458829_2459137_gene	4	4	8	1	1	2	0	1	1	2	0	2	5	5	10		23
	309426_309605_gene	3	2	5	1	0	1	1	3	4	1	0	1	5	7	12		23
	1072751_1073674_gene	2	4	6	0	0	0	3	2	5	1	0	1	5	6	11		23
	254259_255779_gene	6	2	8	1	1	2	4	2	6	1	0	1	0	7	7		24
	1067075_1067147_gene	11	5	16	1	1	2	1	4	5	0	0	0	1	0	1		24
	2617334_2617618_gene	0	1	1	1	1	2	0	1	1	13	2	15	1	4	5		24
	1378370_1379122_gene	7	3	10	1	0	1	4	0	4	1	0	1	2	7	9		25
	2342813_2343106_gene	4	4	8	0	0	0	7	3	10	1	0	1	2	4	6		25
	869667_870320_gene	0	2	2	1	2	3	3	0	3	2	0	2	5	10	15		25
	43827_44570_gene	1	2	3	1	0	1	5	6	11	6	2	8	1	1	2		25
	2434660_2435034_gene	2	4	6	2	1	3	3	2	5	1	1	2	3	7	10		26
	2342246_2342809_gene	4	2	6	2	1	3	5	2	7	4	0	4	4	2	6		26
	2936592_2937014_gene	3	5	8	0	0	0	1	2	3	1	1	2	5	8	13		26
	781434_782447_gene	1	2	3	0	1	1	2	3	5	1	0	1	9	8	17		27
	2718993_2719298_gene	3	4	7	1	1	2	0	0	0	1	1	2	8	8	16		27
	3032560_3033420_gene	2	4	6	0	1	1	3	2	5	0	1	1	5	9	14		27
	1650968_1651390_gene	0	1	1	4	2	6	2	2	4	1	0	1	7	9	16		28
	1379119_1379835_gene	9	5	14	1	0	1	1	2	3	2	0	2	4	4	8		28
	2905000_2905076_gene	8	8	16	0	1	1	4	3	7	0	0	0	3	2	5		29
	2359008_2359208_gene	2	6	8	1	0	1	3	2	5	3	0	3	3	9	12		29
	2438461_2439636_gene	3	6	9	1	1	2	2	1	3	3	1	4	4	8	12		30
	2748442_2749101_gene	3	2	5	1	1	2	1	1	2	2	1	3	9	9	18		30
	412548_413186_gene	3	7	10	2	2	4	1	1	2	2	2	4	2	8	10		30
	2359302_2359685_gene	4	3	7	2	1	3	4	3	7	1	0	1	6	6	12		30
	2157782_2158096_gene	5	3	8	1	1	2	1	2	3	5	2	7	4	6	10		30
	320939_322180_gene	3	4	7	2	2	4	0	2	2	6	1	7	5	6	11		31
	1257167_1257397_gene	3	7	10	5	1	6	0	0	0	4	1	5	7	4	11		32
	463902_464138_gene	3	5	8	2	1	3	2	9	11	1	0	1	5	4	9		32
	2675881_2676495_gene	1	2	3	0	3	3	0	1	1	0	0	0	10	15	25		32
	2820300_2820620_gene	7	7	14	2	1	3	5	1	6	2	1	3	5	1	6		32
	2819644_2819892_gene	1	3	4	1	1	2	2	2	4	3	0	3	14	5	19		32
	2847152_2847520_gene	1	3	4	0	1	1	3	5	8	12	1	13	5	2	7		33
	666468_666980_gene	2	4	6	0	0	0	3	3	6	9	1	10	8	3	11		33
	472961_473572_gene	5	1	6	0	0	0	5	2	7	5	0	5	6	10	16		34
	3316678_3317001_gene	5	1	6	0	0	0	7	7	14	6	0	6	3	6	9		35
	3370378_3370737_gene	6	3	9	0	0	0	1	6	7	0	0	0	6	14	20		36
	1329256_1329492_gene	1	0	1	0	3	3	1	3	4	3	1	4	11	13	24		36
	1254265_1255032_gene	8	5	13	3	3	6	1	0	1	2	1	3	5	8	13		36
	529250_529564_gene	4	9	13	5	0	5	2	1	3	4	1	5	7	4	11		37
	2156663_2157406_gene	3	3	6	1	0	1	2	4	6	1	0	1	11	12	23		37
	1381429_1382139_gene	8	5	13	2	1	3	5	2	7	4	0	4	4	6	10		37
	2339878_2340228_gene	3	2	5	1	2	3	8	3	11	2	0	2	10	6	16		37
	662485_662934_gene	6	9	15	0	1	1	0	4	4	4	1	5	5	8	13		38
	1385397_1385870_gene	12	5	17	1	1	2	4	4	8	0	0	0	3	8	11		38
	3173075_3173935_gene	2	1	3	1	0	1	5	5	10	4	1	5	11	8	19		38
	2317885_2318976_gene	8	6	14	1	2	3	3	2	5	4	1	5	3	8	11		38
	1080143_1081510_gene	4	4	8	2	2	4	6	6	12	6	0	6	3	5	8		38
	2673871_2674098_gene	4	7	11	1	0	1	6	4	10	7	0	7	6	4	10		39
	2683844_2684452_gene	15	5	20	0	2	2	1	3	4	4	1	5	3	5	8		39
	2174909_2175658_gene	14	12	26	0	0	0	3	0	3	1	1	2	5	3	8		39
	531200_531868_gene	3	3	6	5	3	8	2	0	2	7	1	8	8	7	15		39
	1459402_1460616_gene	2	2	4	3	3	6	1	1	2	4	0	4	13	10	23		39
	277484_277987_gene	1	4	5	1	3	4	0	1	1	2	0	2	16	12	28		40
	528685_528975_gene	3	6	9	0	1	1	2	5	7	6	3	9	7	7	14		40
	1291551_1292912_gene	4	1	5	0	3	3	13	6	19	4	2	6	4	4	8		41
	64673_65077_gene	15	10	25	1	0	1	0	4	4	2	0	2	3	6	9		41
	222394_222978_gene	3	8	11	0	1	1	12	5	17	1	0	1	6	5	11		41
	2214817_2215467_gene	11	8	19	1	1	2	4	4	8	1	0	1	5	7	12		42
	2189637_2191265_gene	5	5	10	0	1	1	4	2	6	3	0	3	13	9	22		42
	3101010_3101086_gene	11	15	26	0	0	0	0	0	0	1	0	1	1	14	15		42
	2291585_2291884_gene	0	0	0	0	0	0	21	11	32	3	1	4	3	3	6		42
	1460609_1462408_gene	4	5	9	1	0	1	3	0	3	6	1	7	10	13	23		43
	2866611_2867042_gene	9	8	17	0	0	0	1	0	1	3	0	3	9	13	22		43
	185908_186222_gene	3	1	4	0	1	1	10	11	21	6	1	7	4	6	10		43
	2760334_2760594_gene	5	7	12	1	0	1	7	6	13	2	1	3	10	4	14		43
	530551_531216_gene	7	12	19	2	3	5	2	1	3	3	1	4	3	9	12		43
	529838_530572_gene	0	1	1	9	6	15	0	5	5	6	1	7	6	9	15		43
	3275035_3275577_gene	6	3	9	1	1	2	8	5	13	2	1	3	9	8	17		44
	1440128_1440397_gene	1	3	4	1	0	1	16	8	24	2	0	2	5	8	13		44
	2296796_2296872_gene	2	7	9	2	1	3	1	1	2	4	0	4	16	11	27		45
	3284867_3285292_gene	5	5	10	2	1	3	3	3	6	2	1	3	9	14	23		45
	849512_849700_gene	3	4	7	5	5	10	0	2	2	3	1	4	11	11	22		45
	464225_464764_gene	2	3	5	5	5	10	5	0	5	8	5	13	7	6	13		46
	2681646_2682563_gene	6	13	19	1	0	1	3	5	8	3	1	4	11	3	14		46
	248791_249003_gene	6	6	12	1	1	2	5	2	7	2	0	2	13	11	24		47
	2341530_2342243_gene	7	13	20	2	2	4	7	2	9	1	1	2	6	6	12		47
	2897221_2897619_gene	3	8	11	1	2	3	3	1	4	7	2	9	9	12	21		48
	1235312_1235902_gene	6	5	11	2	4	6	0	1	1	3	1	4	12	14	26		48
	1174402_1174572_gene	9	7	16	0	0	0	4	8	12	0	0	0	12	8	20		48
	595849_595922_gene	28	13	41	0	0	0	2	3	5	0	0	0	2	0	2		48
	1189117_1189560_gene	0	1	1	1	3	4	1	1	2	0	0	0	20	22	42		49
	1390448_1391935_gene	16	8	24	1	1	2	2	3	5	4	1	5	5	8	13		49
	440213_440887_gene	2	1	3	4	6	10	0	1	1	4	1	5	13	17	30		49
	2363881_2364906_gene	7	9	16	2	0	2	1	2	3	2	1	3	18	8	26		50
	1076121_1078067_gene	5	7	12	4	1	5	5	4	9	3	1	4	5	15	20		50
	653057_654031_gene	8	4	12	2	1	3	4	3	7	9	0	9	7	13	20		51
	2336381_2336989_gene	1	1	2	6	5	11	4	4	8	5	1	6	9	15	24		51
	38113_38232_gene	3	3	6	0	0	0	7	10	17	5	0	5	13	10	23		51
	2711277_2712341_gene	6	9	15	1	1	2	0	2	2	4	1	5	19	8	27		51
	1078587_1080140_gene	4	1	5	1	1	2	8	7	15	4	1	5	16	9	25		52
	191073_191285_gene	12	8	20	1	1	2	5	0	5	2	0	2	11	12	23		52
	2478104_2478400_gene	4	9	13	1	1	2	7	6	13	3	2	5	12	7	19		52
	1385725_1386591_gene	20	5	25	2	1	3	2	1	3	0	0	0	8	13	21		52
	1278130_1278900_gene	10	5	15	0	0	0	6	4	10	4	2	6	13	8	21		52
	2792961_2793368_gene	5	8	13	3	1	4	1	5	6	3	1	4	15	10	25		52
	53049_53924_gene	5	1	6	5	1	6	7	4	11	5	0	5	10	14	24		52
	477096_477314_gene	6	3	9	1	0	1	4	2	6	1	0	1	20	16	36		53
	2683534_2683884_gene	6	6	12	5	1	6	5	2	7	2	1	3	11	14	25		53
	2343108_2343410_gene	6	3	9	1	1	2	14	14	28	3	0	3	5	6	11		53
	1735718_1736857_gene	7	13	20	1	0	1	5	0	5	4	2	6	8	13	21		53
	1335613_1336032_gene	5	6	11	3	1	4	8	6	14	2	1	3	12	9	21		53
	2674095_2674403_gene	7	5	12	0	2	2	9	7	16	4	0	4	6	14	20		54
	1248174_1248554_gene	3	7	10	0	0	0	9	10	19	3	2	5	6	14	20		54
	1164408_1164665_gene	5	12	17	1	1	2	9	4	13	6	1	7	6	9	15		54
	1112133_1113392_gene	10	3	13	2	0	2	9	4	13	7	0	7	8	11	19		54
	2138991_2139308_gene	3	2	5	4	1	5	5	3	8	7	2	9	15	13	28		55
	2418506_2418574_misc_RNA	1	3	4	9	12	21	1	0	1	14	7	21	5	4	9		56
	2606999_2607568_gene	12	7	19	2	3	5	2	5	7	5	0	5	11	9	20		56
	1085551_1086810_gene	0	6	6	5	1	6	8	7	15	7	1	8	13	8	21		56
	654121_655545_gene	12	7	19	5	2	7	8	6	14	4	1	5	6	5	11		56
	2488484_2489122_gene	5	5	10	0	0	0	11	11	22	3	3	6	8	10	18		56
	3324084_3324707_gene	4	11	15	0	1	1	1	4	5	0	0	0	12	24	36		57
	1379832_1380872_gene	10	6	16	2	1	3	4	5	9	6	1	7	13	9	22		57
	1106700_1106873_gene	10	10	20	4	5	9	0	0	0	9	0	9	5	15	20		58
	1729478_1730197_gene	20	10	30	1	0	1	5	5	10	1	0	1	5	11	16		58
	2439943_2440710_gene	6	7	13	0	1	1	9	3	12	1	1	2	20	11	31		59
	2221477_2222520_gene	12	2	14	0	1	1	1	6	7	4	0	4	14	19	33		59
	3067648_3067722_gene	12	11	23	2	0	2	4	3	7	3	0	3	13	11	24		59
	1458245_1459405_gene	8	7	15	0	3	3	2	4	6	8	0	8	13	14	27		59
	2343425_2343661_gene	9	10	19	1	0	1	8	7	15	2	0	2	12	12	24		61
	2374714_2375256_gene	11	9	20	5	0	5	9	3	12	3	0	3	6	15	21		61
	2895245_2895847_gene	3	5	8	0	1	1	13	20	33	9	0	9	5	7	12		63
	77507_77582_gene	20	23	43	0	0	0	8	0	8	1	0	1	9	3	12		64
	1595787_1596572_gene	5	6	11	6	10	16	0	1	1	4	0	4	14	18	32		64
	641653_642426_gene	3	5	8	3	3	6	0	6	6	4	1	5	15	24	39		64
	2160204_2160485_gene	6	6	12	4	3	7	5	5	10	7	2	9	15	12	27		65
	2244549_2244962_gene	14	8	22	2	2	4	5	4	9	3	0	3	15	12	27		65
	1082487_1085240_gene	7	4	11	2	0	2	14	8	22	4	1	5	8	17	25		65
	1202264_1202455_gene	8	6	14	1	0	1	7	9	16	18	7	25	4	5	9		65
	2867089_2867496_gene	4	9	13	9	5	14	1	2	3	5	1	6	11	18	29		65
	2099461_2099536_gene	14	13	27	3	1	4	5	2	7	3	0	3	12	12	24		65
	2334705_2335376_gene	3	6	9	0	0	0	9	7	16	10	1	11	18	12	30		66
	338278_339402_gene	5	8	13	4	4	8	4	5	9	2	1	3	15	18	33		66
	2033353_2034642_gene	6	6	12	5	1	6	3	0	3	5	0	5	23	17	40		66
	1167775_1168695_gene	3	5	8	1	3	4	4	5	9	6	1	7	17	22	39		67
	2384233_2385849_gene	4	15	19	2	1	3	3	6	9	3	3	6	15	15	30		67
	2117778_2118701_gene	14	14	28	1	3	4	8	10	18	4	0	4	7	6	13		67
	1401011_1401087_gene	6	6	12	4	2	6	5	1	6	9	3	12	19	13	32		68
	869351_869698_gene	9	5	14	7	1	8	8	7	15	12	1	13	6	12	18		68
	2229193_2229660_gene	1	0	1	0	1	1	11	23	34	17	2	19	5	8	13		68
	1211242_1211661_gene	12	4	16	1	1	2	4	5	9	5	1	6	16	19	35		68
	3284036_3284641_gene	8	11	19	3	1	4	5	2	7	5	0	5	16	18	34		69
	2655484_2656404_gene	4	5	9	3	0	3	0	9	9	22	5	27	11	10	21		69
	3301729_3302265_gene	7	4	11	1	0	1	17	10	27	8	1	9	6	15	21		69
	1585925_1587319_gene	4	3	7	3	2	5	3	2	5	2	1	3	19	30	49		69
	211981_212433_gene	5	5	10	3	3	6	2	3	5	5	0	5	19	25	44		70
	1139570_1139866_gene	4	7	11	0	1	1	8	15	23	20	2	22	6	7	13		70
	1887061_1887339_gene	8	4	12	8	6	14	4	2	6	11	1	12	10	17	27		71
	244591_244992_gene	7	11	18	3	2	5	7	1	8	4	1	5	15	20	35		71
	1372685_1373398_gene	7	7	14	0	0	0	13	7	20	5	4	9	11	17	28		71
	2547160_2547669_gene	0	4	4	0	0	0	18	11	29	23	1	24	6	9	15		72
	2716905_2717306_gene	10	13	23	1	0	1	14	9	23	3	0	3	13	9	22		72
	2362653_2363828_gene	2	10	12	5	2	7	0	1	1	9	1	10	19	23	42		72
	59382_59864_gene	4	6	10	2	4	6	2	3	5	13	3	16	16	19	35		72
	1506551_1506928_gene	7	7	14	1	2	3	7	5	12	7	1	8	17	18	35		72
	2296527_2296602_gene	1	2	3	13	9	22	0	0	0	30	6	36	5	6	11		72
	861690_862226_gene	9	10	19	4	2	6	1	1	2	7	1	8	12	25	37		72
	782548_783009_gene	7	12	19	2	1	3	7	6	13	15	3	18	10	10	20		73
	2745713_2746336_gene	9	10	19	1	2	3	12	16	28	5	2	7	7	9	16		73
	1217235_1217618_gene	20	24	44	0	0	0	5	5	10	9	1	10	3	6	9		73
	2852006_2852869_gene	4	6	10	1	0	1	14	14	28	10	2	12	10	12	22		73
	2715158_2715697_gene	4	14	18	3	7	10	2	2	4	7	1	8	16	18	34		74
	2296658_2296733_gene	6	2	8	7	6	13	1	0	1	34	8	42	3	7	10		74
	869088_869354_gene	26	19	45	2	1	3	3	2	5	1	0	1	8	12	20		74
	532155_532291_misc_RNA	8	6	14	5	5	10	4	2	6	24	7	31	3	11	14		75
	1106967_1107497_gene	7	7	14	6	3	9	1	2	3	10	2	12	20	18	38		76
	1377282_1378373_gene	9	5	14	1	3	4	11	11	22	9	1	10	7	19	26		76
	2389471_2390412_gene	9	4	13	3	6	9	4	4	8	5	2	7	17	22	39		76
	42476_42832_gene	7	3	10	0	0	0	19	14	33	5	2	7	11	15	26		76
	971743_972702_gene	11	11	22	3	5	8	4	6	10	5	0	5	13	18	31		76
	1376276_1377313_gene	12	11	23	1	1	2	8	5	13	7	3	10	9	20	29		77
	2728074_2729180_gene	12	9	21	1	2	3	7	4	11	3	0	3	24	15	39		77
	2714053_2714973_gene	2	4	6	1	1	2	16	18	34	17	3	20	8	8	16		78
	2122066_2122392_gene	21	18	39	3	2	5	1	2	3	3	2	5	14	12	26		78
	2689113_2690039_gene	7	6	13	2	1	3	9	9	18	7	1	8	17	19	36		78
	2863336_2863920_gene	3	9	12	0	0	0	10	5	15	8	3	11	21	19	40		78
	251589_251942_gene	12	15	27	0	0	0	3	6	9	4	2	6	17	19	36		78
	1788993_1789433_gene	12	9	21	1	2	3	4	10	14	6	0	6	16	19	35		79
	2230379_2230795_gene	15	11	26	1	4	5	5	10	15	5	1	6	14	13	27		79
	2912523_2912861_gene	8	4	12	0	0	0	40	21	61	3	0	3	1	2	3		79
	3044791_3045321_gene	12	10	22	9	5	14	3	2	5	4	0	4	16	19	35		80
	119362_119937_gene	18	19	37	3	1	4	3	4	7	7	0	7	15	10	25		80
	2040383_2040499_misc_RNA	14	8	22	11	6	17	2	4	6	19	3	22	3	11	14		81
	2493393_2493923_gene	2	0	2	0	1	1	30	28	58	10	1	11	4	5	9		81
	3013221_3014102_gene	8	9	17	0	1	1	15	9	24	15	1	16	14	9	23		81
	3307008_3307334_gene	8	13	21	4	2	6	6	6	12	5	2	7	18	17	35		81
	1504982_1505950_gene	14	10	24	2	1	3	3	6	9	7	3	10	17	18	35		81
	870831_871481_gene	13	17	30	2	4	6	15	6	21	6	3	9	2	14	16		82
	2171262_2171519_gene	16	11	27	2	0	2	4	1	5	1	1	2	21	25	46		82
	567697_568848_gene	12	10	22	5	2	7	4	2	6	15	3	18	10	19	29		82
	2813566_2814090_gene	7	9	16	4	5	9	4	3	7	8	0	8	19	23	42		82
	2890013_2891401_gene	7	13	20	1	1	2	7	3	10	5	3	8	19	23	42		82
	3294905_3295056_misc_RNA	7	7	14	4	6	10	1	1	2	13	2	15	17	24	41		82
	2845967_2846308_gene	16	10	26	11	7	18	1	2	3	4	1	5	14	17	31		83
	660200_662407_gene	15	8	23	3	4	7	6	1	7	7	0	7	20	20	40		84
	2845298_2845771_gene	10	7	17	0	4	4	16	18	34	6	0	6	9	14	23		84
	1234315_1235076_gene	12	5	17	0	1	1	18	17	35	14	1	15	6	10	16		84
	2391194_2391550_gene	7	11	18	3	1	4	10	13	23	9	1	10	13	16	29		84
	2881518_2882288_gene	6	9	15	6	7	13	4	6	10	8	2	10	16	21	37		85
	1609468_1609833_gene	5	5	10	3	1	4	8	6	14	11	3	14	14	30	44		86
	1139067_1139384_gene	3	0	3	1	2	3	20	31	51	8	2	10	9	10	19		86
	1641412_1641933_gene	26	23	49	0	1	1	3	0	3	7	2	9	8	16	24		86
	1188292_1188813_gene	20	13	33	2	1	3	4	3	7	4	2	6	14	23	37		86
	2570220_2570831_gene	1	2	3	1	0	1	29	18	47	20	6	26	5	4	9		86
	1552519_1553904_gene	9	9	18	6	5	11	1	3	4	10	1	11	21	22	43		87
	2774397_2775035_gene	2	10	12	0	1	1	34	23	57	5	0	5	6	6	12		87
	2154720_2155871_gene	7	11	18	3	1	4	8	8	16	9	4	13	19	17	36		87
	174882_176057_gene	11	10	21	5	4	9	2	5	7	5	6	11	19	20	39		87
	2712550_2714076_gene	11	15	26	4	2	6	8	4	12	6	4	10	16	17	33		87
	2916109_2916840_gene	15	6	21	6	5	11	8	2	10	7	2	9	18	19	37		88
	233381_233917_gene	14	15	29	4	2	6	9	7	16	8	0	8	17	12	29		88
	594470_595537_gene	3	9	12	4	8	12	9	5	14	10	2	12	21	17	38		88
	1364344_1364772_gene	8	9	17	0	2	2	19	22	41	5	1	6	7	15	22		88
	2874608_2875273_gene	10	8	18	2	4	6	4	8	12	4	1	5	19	29	48		89
	1255029_1255853_gene	9	5	14	4	5	9	5	4	9	9	2	11	20	26	46		89
	2180947_2181756_gene	4	8	12	3	2	5	15	14	29	6	3	9	14	20	34		89
	1215532_1216227_gene	20	19	39	3	3	6	2	4	6	6	4	10	15	13	28		89
	3154174_3155901_gene	12	17	29	4	1	5	4	4	8	11	3	14	19	15	34		90
	2669531_2669896_gene	25	19	44	1	1	2	6	7	13	13	1	14	7	10	17		90
	1794227_1794619_gene	14	11	25	7	1	8	4	0	4	7	3	10	23	20	43		90
	448284_448832_gene	1	2	3	4	1	5	18	13	31	18	7	25	12	14	26		90
	1046144_1046275_misc_RNA	10	8	18	5	6	11	1	3	4	20	7	27	14	16	30		90
	2719521_2720180_gene	26	31	57	1	2	3	2	7	9	3	1	4	6	12	18		91
	1165936_1167117_gene	16	14	30	3	4	7	11	9	20	6	1	7	10	17	27		91
	2904635_2904871_gene	6	4	10	13	7	20	2	1	3	7	2	9	29	20	49		91
	1173776_1174147_gene	13	6	19	3	1	4	6	6	12	4	1	5	28	24	52		92
	779576_780667_gene	16	12	28	4	1	5	11	4	15	2	2	4	20	20	40		92
	1203181_1203783_gene	3	3	6	5	1	6	8	9	17	4	3	7	26	31	57		93
	3221360_3221593_gene	5	12	17	11	5	16	1	2	3	2	2	4	21	32	53		93
	3284621_3284705_misc_RNA	1	3	4	29	19	48	0	0	0	26	11	37	1	4	5		94
	1178481_1179164_gene	6	11	17	1	0	1	15	16	31	20	2	22	13	11	24		95
	2670253_2670618_gene	4	4	8	2	0	2	41	30	71	1	0	1	6	7	13		95
	2924663_2925160_gene	9	7	16	6	4	10	3	2	5	4	3	7	37	21	58		96
	1807502_1808041_gene	16	17	33	0	2	2	15	15	30	6	3	9	6	16	22		96
	1718670_1719407_gene	11	9	20	0	4	4	7	8	15	19	2	21	13	23	36		96
	1164677_1164880_gene	7	12	19	4	6	10	11	11	22	14	3	17	14	15	29		97
	1760298_1761188_gene	13	5	18	5	4	9	2	3	5	9	3	12	24	29	53		97
	65147_65890_gene	9	10	19	1	2	3	15	24	39	10	3	13	10	13	23		97
	2797458_2798042_gene	19	18	37	9	5	14	3	2	5	8	5	13	16	12	28		97
	2332119_2332901_gene	6	13	19	4	2	6	19	8	27	9	3	12	17	17	34		98
	952719_953018_gene	12	6	18	0	0	0	25	21	46	12	3	15	10	9	19		98
	1113389_1114522_gene	4	15	19	7	1	8	5	7	12	10	2	12	23	24	47		98
	215391_216131_gene	15	9	24	3	4	7	4	4	8	6	1	7	25	27	52		98
	2635647_2636246_gene	20	15	35	4	4	8	18	6	24	7	2	9	8	15	23		99
	668041_668580_gene	6	3	9	6	3	9	16	11	27	16	6	22	16	16	32		99
	2340242_2341561_gene	12	10	22	2	4	6	9	9	18	8	1	9	25	19	44		99
	2773093_2773653_gene	17	17	34	0	0	0	23	23	46	8	1	9	4	6	10		99
	3201113_3201853_gene	21	19	40	1	3	4	4	5	9	7	0	7	17	22	39		99
	3001753_3002868_gene	4	6	10	4	3	7	7	12	19	11	3	14	21	28	49		99
	1803601_1804257_gene	14	9	23	3	3	6	5	5	10	2	1	3	27	30	57		99
	2747147_2748094_gene	14	4	18	7	3	10	3	13	16	9	2	11	22	23	45		100
	2330325_2331710_gene	12	7	19	5	6	11	13	11	24	8	1	9	18	19	37		100
	810597_811121_gene	12	12	24	2	3	5	11	16	27	19	3	22	9	13	22		100
	2773873_2774256_gene	15	16	31	4	2	6	10	11	21	8	1	9	14	20	34		101
	2768903_2769045_misc_RNA	5	7	12	17	6	23	3	5	8	21	9	30	13	15	28		101
	2191518_2193512_gene	23	15	38	5	2	7	1	5	6	2	0	2	22	26	48		101
	211023_211934_gene	11	16	27	7	4	11	2	3	5	2	2	4	26	28	54		101
	1439890_1440204_gene	12	7	19	0	1	1	18	25	43	14	2	16	11	11	22		101
	2350801_2351682_gene	16	19	35	3	3	6	4	6	10	15	2	17	13	21	34		102
	1337473_1338144_gene	12	13	25	2	3	5	10	4	14	9	0	9	33	17	50		103
	1785236_1786108_gene	9	11	20	5	1	6	23	23	46	6	1	7	13	11	24		103
	2892417_2892845_gene	18	13	31	8	3	11	0	0	0	8	1	9	17	35	52		103
	983508_983915_gene	15	11	26	5	3	8	3	4	7	5	2	7	29	26	55		103
	557618_558406_gene	8	8	16	3	3	6	7	7	14	6	1	7	33	28	61		104
	1207933_1208925_gene	21	24	45	1	0	1	11	4	15	10	6	16	10	17	27		104
	3068642_3069127_gene	28	25	53	3	5	8	2	2	4	5	1	6	19	14	33		104
	620555_621118_gene	6	6	12	7	5	12	7	9	16	14	3	17	21	26	47		104
	2814249_2814902_gene	3	4	7	6	6	12	10	7	17	11	3	14	23	32	55		105
	2883256_2884101_gene	14	13	27	3	8	11	8	1	9	7	1	8	17	33	50		105
	2480322_2481827_gene	22	12	34	0	1	1	5	6	11	11	3	14	24	21	45		105
	1190100_1190813_gene	6	3	9	4	0	4	21	20	41	18	6	24	13	14	27		105
	2906717_2906971_gene	6	5	11	4	1	5	25	21	46	14	4	18	11	14	25		105
	934770_934901_gene	12	15	27	7	5	12	3	5	8	17	2	19	18	21	39		105
	1400011_1400796_gene	5	5	10	9	6	15	3	5	8	9	2	11	29	32	61		105
	2898333_2898599_gene	20	25	45	1	3	4	9	13	22	11	2	13	13	10	23		107
	3073978_3074766_gene	7	5	12	1	2	3	26	31	57	7	1	8	17	10	27		107
	1880467_1881093_gene	33	46	79	0	2	2	2	1	3	1	0	1	13	10	23		108
	2905190_2905567_gene	9	11	20	4	3	7	12	20	32	17	0	17	16	16	32		108
	2071231_2072127_gene	12	15	27	9	5	14	5	1	6	12	7	19	21	21	42		108
	1313598_1313685_gene	9	4	13	0	0	0	42	27	69	1	2	3	10	13	23		108
	2212015_2212392_gene	17	14	31	4	6	10	6	3	9	13	4	17	21	21	42		109
	2872931_2873764_gene	9	12	21	7	0	7	1	6	7	3	1	4	26	44	70		109
	668593_669300_gene	10	13	23	11	0	11	11	8	19	28	4	32	10	15	25		110
	1455996_1458131_gene	7	14	21	1	3	4	10	7	17	15	4	19	23	27	50		111
	20676_21623_gene	25	20	45	3	4	7	15	9	24	9	1	10	15	10	25		111
	1766756_1766845_gene	8	12	20	1	2	3	15	16	31	5	1	6	26	26	52		112
	734908_736314_gene	17	16	33	5	3	8	4	6	10	6	2	8	21	32	53		112
	1765512_1766573_gene	35	31	66	2	1	3	2	7	9	6	1	7	13	14	27		112
	3156161_3156715_gene	12	10	22	3	3	6	5	6	11	11	3	14	26	34	60		113
	46638_46994_gene	15	17	32	2	4	6	3	7	10	11	2	13	27	25	52		113
	2389116_2389376_gene	10	10	20	12	10	22	6	4	10	21	6	27	13	21	34		113
	2086717_2086793_gene	33	25	58	0	2	2	0	1	1	0	0	0	26	27	53		114
	1628191_1628910_gene	10	7	17	5	4	9	5	9	14	14	2	16	36	22	58		114
	424815_425297_gene	10	7	17	0	0	0	30	30	60	13	2	15	16	6	22		114
	2215443_2216303_gene	17	12	29	3	4	7	7	14	21	14	4	18	19	21	40		115
	1444970_1445260_gene	10	14	24	19	16	35	4	1	5	10	8	18	12	21	33		115
	216128_217069_gene	14	13	27	2	5	7	4	4	8	7	2	9	26	39	65		116
	1236120_1236878_gene	14	10	24	1	3	4	14	17	31	21	5	26	19	12	31		116
	1416806_1418392_gene	10	8	18	3	1	4	21	32	53	17	4	21	9	11	20		116
	433098_433637_gene	18	14	32	7	4	11	1	3	4	7	3	10	29	31	60		117
	2180075_2180950_gene	12	22	34	2	0	2	12	16	28	17	4	21	16	16	32		117
	2335389_2336384_gene	9	20	29	2	2	4	11	9	20	8	2	10	26	28	54		117
	2207148_2207912_gene	13	6	19	5	2	7	19	19	38	9	3	12	15	26	41		117
	871409_871501_misc_RNA	5	5	10	21	19	40	0	1	1	26	3	29	11	27	38		118
	2118701_2120689_gene	9	15	24	5	4	9	14	9	23	15	0	15	23	24	47		118
	2776438_2777157_gene	26	12	38	10	5	15	6	4	10	16	3	19	19	17	36		118
	1221312_1222988_gene	17	15	32	2	3	5	15	23	38	14	4	18	14	12	26		119
	2891426_2892154_gene	19	18	37	3	0	3	13	2	15	7	1	8	23	33	56		119
	939745_940296_gene	14	14	28	6	7	13	6	4	10	10	0	10	36	22	58		119
	1996528_1996797_gene	11	9	20	2	0	2	31	32	63	16	9	25	3	8	11		121
	1423168_1423932_gene	16	17	33	3	5	8	9	7	16	15	4	19	21	24	45		121
	528190_528624_gene	17	19	36	3	2	5	7	6	13	4	2	6	21	41	62		122
	293014_293739_gene	9	12	21	7	2	9	8	7	15	5	2	7	30	40	70		122
	1730285_1731028_gene	15	15	30	7	1	8	18	15	33	9	3	12	16	23	39		122
	1388172_1388510_gene	48	35	83	1	2	3	4	2	6	2	0	2	15	13	28		122
	556665_557597_gene	10	6	16	4	4	8	7	6	13	9	2	11	36	40	76		124
	187002_187889_gene	19	16	35	4	4	8	4	4	8	7	1	8	27	38	65		124
	3363033_3363119_gene	18	15	33	4	4	8	11	11	22	6	3	9	29	23	52		124
	2315954_2316583_gene	4	3	7	2	2	4	34	22	56	27	6	33	8	16	24		124
	899600_899893_gene	15	20	35	9	2	11	6	6	12	18	3	21	30	15	45		124
	1838135_1839253_gene	16	11	27	6	1	7	4	4	8	11	2	13	30	39	69		124
	2325174_2327066_gene	12	16	28	3	3	6	13	11	24	7	3	10	22	34	56		124
	1732217_1733287_gene	13	13	26	4	5	9	11	12	23	11	2	13	18	36	54		125
	1218657_1221026_gene	13	18	31	2	4	6	16	7	23	19	5	24	22	19	41		125
	2086398_2086473_gene	37	41	78	0	1	1	3	2	5	1	1	2	24	15	39		125
	322271_323134_gene	16	21	37	7	5	12	7	9	16	15	6	21	21	19	40		126
	193391_193852_gene	13	5	18	6	2	8	4	10	14	6	6	12	42	32	74		126
	1584944_1585762_gene	30	31	61	5	6	11	0	8	8	10	2	12	16	18	34		126
	77828_78052_gene	30	25	55	0	1	1	0	2	2	2	1	3	25	40	65		126
	2590712_2590798_gene	18	18	36	4	1	5	4	3	7	11	3	14	26	39	65		127
	1505937_1506554_gene	10	5	15	3	4	7	6	7	13	7	2	9	34	49	83		127
	2864214_2865380_gene	18	25	43	5	5	10	17	18	35	7	0	7	16	16	32		127
	2113708_2114232_gene	23	35	58	2	0	2	21	14	35	6	1	7	15	12	27		129
	2001413_2002180_gene	19	21	40	6	2	8	17	12	29	9	2	11	16	25	41		129
	1742704_1743267_gene	19	20	39	6	3	9	5	2	7	12	2	14	27	33	60		129
	2680981_2681454_gene	17	9	26	3	2	5	6	11	17	6	2	8	34	40	74		130
	1187306_1187917_gene	17	25	42	5	4	9	4	10	14	12	3	15	25	26	51		131
	2687420_2688874_gene	25	15	40	2	3	5	4	8	12	3	2	5	32	37	69		131
	1140537_1141034_gene	7	8	15	4	1	5	28	23	51	22	9	31	10	19	29		131
	3020700_3021245_gene	20	17	37	8	5	13	7	7	14	10	2	12	36	20	56		132
	2867493_2868449_gene	19	20	39	5	8	13	8	9	17	10	3	13	25	25	50		132
	2484763_2485095_gene	21	13	34	17	8	25	14	11	25	13	0	13	12	23	35		132
	320556_320939_gene	27	17	44	7	1	8	20	13	33	8	3	11	20	17	37		133
	1956770_1957390_gene	20	15	35	5	5	10	13	8	21	8	1	9	29	29	58		133
	2573383_2574225_gene	21	17	38	8	3	11	15	7	22	16	3	19	21	22	43		133
	560931_563144_gene	24	4	28	2	4	6	13	19	32	4	2	6	32	30	62		134
	157650_163277_gene	10	12	22	2	2	4	22	11	33	24	7	31	20	24	44		134
	2695048_2695974_gene	11	20	31	2	5	7	8	17	25	10	1	11	30	30	60		134
	1339417_1339980_gene	14	12	26	4	8	12	18	14	32	15	5	20	22	22	44		134
	2589004_2589624_gene	12	17	29	3	4	7	26	17	43	12	2	14	16	26	42		135
	2768334_2768780_gene	15	19	34	7	1	8	3	3	6	8	4	12	35	40	75		135
	2564056_2564155_misc_RNA	5	7	12	4	1	5	8	6	14	54	20	74	15	15	30		135
	2590816_2590889_gene	10	7	17	18	12	30	2	1	3	10	5	15	32	38	70		135
	2164322_2165803_gene	7	9	16	0	0	0	35	49	84	11	0	11	11	13	24		135
	1394907_1395554_gene	39	38	77	3	1	4	2	1	3	3	1	4	22	25	47		135
	1209124_1209627_gene	16	18	34	4	1	5	23	22	45	4	7	11	18	23	41		136
	1024610_1025785_gene	7	15	22	10	12	22	5	1	6	7	2	9	38	39	77		136
	2373011_2373499_gene	20	17	37	2	3	5	15	16	31	11	2	13	22	28	50		136
	2072131_2072412_gene	8	11	19	4	5	9	12	7	19	12	3	15	39	35	74		136
	98310_99086_gene	5	5	10	4	4	8	10	7	17	49	11	60	17	24	41		136
	2317451_2317603_misc_RNA	1	1	2	4	10	14	11	14	25	52	14	66	11	19	30		137
	702084_702902_gene	21	32	53	3	3	6	11	5	16	4	1	5	32	26	58		138
	2858107_2859657_gene	7	11	18	2	0	2	28	20	48	28	5	33	17	20	37		138
	1798234_1799544_gene	16	13	29	4	11	15	7	4	11	12	2	14	32	37	69		138
	1774858_1775340_gene	25	23	48	12	5	17	5	8	13	15	3	18	17	26	43		139
	2760549_2760986_gene	19	22	41	2	1	3	12	7	19	9	0	9	30	38	68		140
	2816981_2817553_gene	20	13	33	5	2	7	7	14	21	23	2	25	19	35	54		140
	496446_497702_gene	7	5	12	30	14	44	2	6	8	37	13	50	9	17	26		140
	3110820_3111548_gene	22	28	50	5	8	13	16	13	29	14	1	15	9	25	34		141
	693821_695227_gene	25	31	56	6	6	12	5	4	9	6	4	10	30	24	54		141
	1579611_1580459_gene	17	19	36	10	8	18	9	3	12	14	1	15	28	32	60		141
	3095189_3095277_misc_RNA	8	10	18	13	11	24	11	5	16	7	2	9	42	33	75		142
	724645_725484_gene	16	15	31	5	5	10	7	6	13	6	2	8	38	42	80		142
	2386207_2387121_gene	7	8	15	6	2	8	41	31	72	17	2	19	14	14	28		142
	2104447_2104722_gene	38	38	76	7	5	12	3	7	10	18	6	24	8	13	21		143
	2316456_2317292_gene	9	17	26	2	2	4	32	26	58	30	6	36	5	14	19		143
	1719561_1719968_gene	39	38	77	1	2	3	1	2	3	4	1	5	28	27	55		143
	1243201_1244760_gene	16	11	27	7	11	18	5	5	10	7	1	8	32	48	80		143
	470060_470998_gene	26	24	50	2	4	6	10	23	33	12	3	15	19	21	40		144
	2677194_2678462_gene	20	21	41	0	2	2	31	15	46	7	0	7	19	29	48		144
	3387135_3388301_gene	16	21	37	6	0	6	25	16	41	12	4	16	24	20	44		144
	951911_952465_gene	23	30	53	5	5	10	6	8	14	8	1	9	28	31	59		145
	199432_200187_gene	23	19	42	0	2	2	16	14	30	10	2	12	30	30	60		146
	2758651_2759265_gene	10	11	21	14	9	23	6	3	9	3	1	4	45	44	89		146
	2256245_2256820_gene	9	12	21	4	3	7	5	8	13	8	0	8	47	51	98		147
	2237116_2237430_gene	11	20	31	19	9	28	0	0	0	8	2	10	36	42	78		147
	1996806_1997555_gene	11	12	23	1	2	3	23	31	54	27	7	34	15	18	33		147
	1780170_1780697_gene	11	13	24	11	6	17	11	18	29	14	4	18	27	33	60		148
	202064_202924_gene	27	37	64	3	4	7	12	14	26	9	4	13	15	23	38		148
	1743361_1743810_gene	28	21	49	6	6	12	8	8	16	15	4	19	20	32	52		148
	3126646_3126722_gene	36	27	63	1	2	3	13	5	18	2	0	2	30	33	63		149
	2254420_2255115_gene	29	22	51	6	5	11	1	9	10	8	2	10	37	30	67		149
	2421627_2422256_gene	20	33	53	6	10	16	7	4	11	16	2	18	25	28	53		151
	176652_176885_gene	20	6	26	7	4	11	19	14	33	16	1	17	29	35	64		151
	592083_592856_gene	18	14	32	9	13	22	3	3	6	10	1	11	36	45	81		152
	316127_316723_gene	18	25	43	3	4	7	3	5	8	7	1	8	40	46	86		152
	2888571_2889425_gene	28	20	48	2	2	4	13	12	25	5	1	6	29	41	70		153
	1799502_1800338_gene	14	16	30	1	8	9	6	8	14	8	5	13	45	42	87		153
	1374382_1376457_gene	18	11	29	5	6	11	15	14	29	17	7	24	29	31	60		153
	359030_359575_gene	17	17	34	18	15	33	4	3	7	10	4	14	29	37	66		154
	176091_176453_gene	32	24	56	2	2	4	6	7	13	12	2	14	30	37	67		154
	2365065_2366483_gene	24	26	50	6	10	16	1	7	8	14	3	17	27	37	64		155
	3301303_3301524_gene	26	22	48	4	1	5	18	13	31	16	1	17	26	28	54		155
	2123771_2124673_gene	15	11	26	2	3	5	8	9	17	10	2	12	43	52	95		155
	99132_99578_gene	20	23	43	4	6	10	18	18	36	16	2	18	28	20	48		155
	194761_195582_gene	14	11	25	2	6	8	7	17	24	22	8	30	28	40	68		155
	3255839_3257128_gene	23	14	37	11	10	21	5	1	6	4	2	6	39	46	85		155
	1075236_1076102_gene	32	32	64	1	0	1	13	15	28	17	2	19	20	24	44		156
	2590950_2591025_gene	53	39	92	3	0	3	6	2	8	8	2	10	15	28	43		156
	2357327_2357848_gene	2	4	6	1	1	2	59	49	108	14	4	18	13	10	23		157
	413345_413495_misc_RNA	6	12	18	10	5	15	13	12	25	36	9	45	28	27	55		158
	2387133_2387723_gene	24	17	41	8	6	14	9	10	19	17	4	21	27	36	63		158
	1603092_1604477_gene	16	18	34	4	3	7	27	23	50	29	5	34	11	22	33		158
	232599_233384_gene	27	23	50	6	4	10	15	12	27	21	1	22	26	23	49		158
	2583420_2583980_gene	29	37	66	10	12	22	8	8	16	18	2	20	13	22	35		159
	1257597_1258481_gene	21	13	34	0	0	0	18	22	40	28	10	38	22	25	47		159
	1068446_1069525_gene	21	24	45	4	9	13	3	3	6	8	2	10	44	42	86		160
	291705_291852_misc_RNA	7	7	14	8	5	13	8	8	16	30	10	40	25	52	77		160
	2684581_2687148_gene	7	9	16	4	0	4	31	40	71	26	10	36	16	17	33		160
	848574_849263_gene	19	27	46	4	8	12	13	10	23	13	3	16	28	35	63		160
	3151710_3151961_gene	18	14	32	17	14	31	3	0	3	11	5	16	28	50	78		160
	2368723_2369634_gene	13	14	27	9	4	13	11	5	16	18	9	27	37	40	77		160
	3040006_3041637_gene	15	11	26	3	3	6	12	14	26	12	1	13	44	46	90		161
	2759982_2760260_gene	6	18	24	22	29	51	4	2	6	7	3	10	32	38	70		161
	3386253_3387104_gene	31	32	63	6	10	16	6	6	12	16	4	20	25	25	50		161
	1463957_1464271_gene	21	21	42	3	3	6	9	5	14	12	4	16	42	41	83		161
	2973928_2974362_gene	15	12	27	9	2	11	5	5	10	11	4	15	45	53	98		161
	2122901_2122994_misc_RNA	12	15	27	19	12	31	16	11	27	17	3	20	27	29	56		161
	2749238_2750998_gene	16	13	29	5	4	9	4	8	12	16	1	17	37	57	94		161
	892225_892893_gene	39	30	69	5	7	12	5	4	9	18	3	21	27	23	50		161
	214503_215387_gene	25	18	43	10	10	20	15	8	23	18	1	19	26	31	57		162
	1338388_1339359_gene	26	23	49	5	6	11	6	18	24	11	3	14	37	27	64		162
	1171464_1171805_gene	27	27	54	4	7	11	8	5	13	6	0	6	32	46	78		162
	2902191_2902412_gene	19	23	42	2	1	3	16	16	32	8	2	10	32	43	75		162
	1628907_1629545_gene	10	12	22	6	16	22	7	9	16	23	10	33	35	34	69		162
	2103996_2104310_gene	4	2	6	3	0	3	46	50	96	29	7	36	10	11	21		162
	2171659_2172705_gene	10	11	21	2	3	5	37	30	67	25	5	30	15	24	39		162
	1733483_1734274_gene	29	11	40	7	8	15	13	13	26	18	5	23	33	26	59		163
	1437841_1439760_gene	37	23	60	8	6	14	8	6	14	11	5	16	28	31	59		163
	1483403_1484038_gene	36	28	64	7	8	15	5	5	10	11	2	13	26	35	61		163
	3052593_3053075_gene	25	19	44	8	5	13	14	11	25	25	5	30	24	27	51		163
	1277254_1278018_gene	25	23	48	4	4	8	4	10	14	21	5	26	40	27	67		163
	2548037_2548792_gene	25	21	46	12	2	14	7	7	14	17	3	20	34	36	70		164
	2375275_2376813_gene	17	33	50	3	4	7	18	18	36	12	4	16	28	27	55		164
	136967_137446_gene	33	31	64	4	6	10	6	7	13	27	7	34	25	18	43		164
	2608065_2608319_gene	24	22	46	5	8	13	6	2	8	11	2	13	46	38	84		164
	2633493_2633723_gene	14	15	29	8	9	17	2	1	3	10	6	16	54	45	99		164
	361478_361553_gene	51	45	96	0	1	1	3	2	5	0	0	0	34	28	62		164
	74729_74969_misc_RNA	19	12	31	19	19	38	0	1	1	17	9	26	35	34	69		165
	246607_247314_gene	3	9	12	5	5	10	12	13	25	2	0	2	64	52	116		165
	2002200_2003207_gene	21	26	47	1	3	4	23	18	41	15	4	19	29	26	55		166
	1808947_1809837_gene	15	18	33	4	1	5	38	31	69	20	5	25	20	14	34		166
	189144_190304_gene	12	14	26	1	3	4	34	28	62	42	6	48	13	13	26		166
	2882559_2883128_gene	11	8	19	6	7	13	14	14	28	22	2	24	31	52	83		167
	564885_565352_gene	13	13	26	12	8	20	6	5	11	23	2	25	40	45	85		167
	1734250_1735737_gene	19	16	35	7	6	13	8	12	20	24	6	30	31	39	70		168
	2219318_2220685_gene	29	35	64	6	3	9	12	21	33	10	4	14	21	27	48		168
	196286_197170_gene	38	29	67	4	3	7	2	8	10	12	1	13	28	43	71		168
	2880193_2880528_gene	25	26	51	5	5	10	17	20	37	6	6	12	32	27	59		169
	1766723_1766929_gene	28	12	40	1	2	3	5	2	7	10	1	11	57	51	108		169
	3245110_3245283_misc_RNA	10	15	25	13	7	20	10	10	20	31	7	38	26	41	67		170
	2589773_2590693_gene	18	22	40	4	2	6	20	19	39	20	1	21	30	34	64		170
	527438_528013_gene	9	21	30	9	6	15	24	16	40	13	3	16	33	36	69		170
	2843496_2843861_gene	26	22	48	9	5	14	5	12	17	6	2	8	37	47	84		171
	593345_594229_gene	16	18	34	19	9	28	7	9	16	19	2	21	37	35	72		171
	2679203_2679874_gene	24	27	51	2	0	2	13	8	21	5	2	7	48	42	90		171
	1979015_1979965_gene	31	27	58	7	3	10	24	21	45	12	4	16	17	25	42		171
	2658127_2659254_gene	33	34	67	6	9	15	4	5	9	11	4	15	31	34	65		171
	1579078_1579614_gene	17	23	40	14	6	20	9	4	13	23	7	30	38	30	68		171
	2332894_2334705_gene	15	19	34	5	4	9	15	19	34	18	0	18	37	39	76		171
	992563_993222_gene	22	18	40	19	20	39	2	1	3	19	3	22	33	35	68		172
	42891_43613_gene	21	28	49	8	8	16	6	5	11	19	7	26	32	39	71		173
	2567108_2567422_gene	25	24	49	2	4	6	31	32	63	11	2	13	21	21	42		173
	1995754_1996524_gene	27	26	53	1	2	3	26	32	58	35	6	41	12	7	19		174
	333622_334503_gene	37	39	76	1	2	3	33	34	67	13	2	15	9	4	13		174
	991514_992566_gene	18	25	43	12	12	24	3	2	5	17	6	23	40	39	79		174
	2397952_2398533_gene	22	23	45	3	3	6	10	15	25	9	2	11	45	43	88		175
	514890_515432_gene	13	17	30	2	0	2	31	25	56	13	5	18	39	30	69		175
	3175334_3177385_gene	17	30	47	8	14	22	12	8	20	14	1	15	27	45	72		176
	3295187_3296458_gene	12	12	24	8	4	12	11	17	28	11	1	12	52	48	100		176
	2290607_2291458_gene	25	17	42	1	1	2	40	40	80	8	0	8	22	22	44		176
	1070520_1071026_gene	9	10	19	4	6	10	5	5	10	26	11	37	45	56	101		177
	2717701_2718798_gene	4	9	13	2	0	2	44	41	85	36	10	46	19	12	31		177
	2206539_2207105_gene	11	10	21	4	7	11	22	26	48	9	1	10	49	39	88		178
	2345877_2346560_gene	15	14	29	8	8	16	26	34	60	4	1	5	33	35	68		178
	3220404_3221213_gene	28	28	56	8	8	16	7	6	13	27	6	33	22	38	60		178
	627276_627971_gene	21	18	39	10	4	14	3	2	5	16	0	16	43	61	104		178
	1294101_1294520_gene	11	8	19	13	9	22	24	34	58	8	1	9	33	38	71		179
	1781654_1783435_gene	19	11	30	7	14	21	8	5	13	22	6	28	45	42	87		179
	1912012_1913700_gene	13	11	24	4	6	10	16	15	31	11	1	12	59	43	102		179
	1268082_1269605_gene	13	14	27	6	6	12	23	27	50	19	2	21	32	38	70		180
	1754534_1754911_gene	23	19	42	12	11	23	7	5	12	17	5	22	41	41	82		181
	1447359_1448246_gene	25	15	40	6	5	11	26	32	58	14	5	19	26	27	53		181
	3041997_3044540_gene	10	17	27	10	10	20	5	6	11	9	1	10	41	72	113		181
	2422285_2423406_gene	13	17	30	3	5	8	25	22	47	25	9	34	26	36	62		181
	2297854_2298156_gene	24	29	53	2	4	6	5	3	8	1	1	2	60	53	113		182
	2917042_2918136_gene	10	7	17	34	24	58	5	12	17	7	4	11	27	52	79		182
	1444509_1444737_misc_RNA	26	10	36	19	16	35	4	2	6	16	7	23	37	45	82		182
	1088593_1088958_gene	30	26	56	4	3	7	29	31	60	6	2	8	21	31	52		183
	1148453_1148641_gene	32	16	48	1	5	6	45	36	81	20	5	25	12	11	23		183
	1701541_1701963_gene	21	20	41	6	2	8	19	12	31	13	4	17	49	37	86		183
	190331_191104_gene	24	20	44	15	10	25	10	15	25	14	7	21	38	30	68		183
	1800317_1801303_gene	19	14	33	13	6	19	7	7	14	8	0	8	51	58	109		183
	3077034_3077663_gene	24	12	36	5	9	14	11	8	19	5	1	6	59	49	108		183
	3006445_3006672_gene	19	16	35	18	9	27	7	14	21	27	5	32	29	39	68		183
	1170029_1171213_gene	29	28	57	8	8	16	8	14	22	19	4	23	40	26	66		184
	3381940_3382225_misc_RNA	4	3	7	1	1	2	50	34	84	65	20	85	6	1	7		185
	1760090_1760287_gene	17	18	35	17	10	27	1	3	4	21	5	26	40	53	93		185
	912191_913078_gene	22	27	49	10	8	18	5	10	15	13	6	19	36	48	84		185
	470965_471864_gene	38	29	67	3	2	5	21	19	40	13	4	17	27	30	57		186
	647840_648553_gene	30	41	71	11	14	25	4	5	9	14	3	17	35	29	64		186
	1658523_1659224_gene	26	27	53	7	4	11	8	9	17	14	7	21	35	50	85		187
	1523437_1523907_gene	26	28	54	7	10	17	2	3	5	12	4	16	48	47	95		187
	2360881_2360970_misc_RNA	3	1	4	29	28	57	1	0	1	100	20	120	3	2	5		187
	1899877_1900431_gene	29	21	50	9	4	13	30	18	48	11	3	14	34	29	63		188
	2715994_2716908_gene	23	28	51	2	1	3	34	25	59	8	3	11	33	32	65		189
	2808266_2808829_gene	11	15	26	5	1	6	28	20	48	11	4	15	45	49	94		189
	1202600_1203058_gene	12	14	26	7	10	17	15	16	31	18	5	23	36	56	92		189
	1139872_1140537_gene	17	12	29	3	5	8	30	31	61	33	8	41	24	26	50		189
	2495267_2495671_gene	20	23	43	4	8	12	22	18	40	14	5	19	37	39	76		190
	1429177_1429644_gene	18	24	42	2	4	6	23	21	44	14	4	18	35	45	80		190
	62628_63536_gene	26	33	59	4	6	10	26	13	39	8	0	8	33	41	74		190
	2746308_2747150_gene	33	39	72	5	4	9	19	21	40	15	6	21	22	27	49		191
	780630_781301_gene	29	21	50	4	4	8	13	8	21	8	4	12	45	55	100		191
	609838_609913_gene	77	45	122	1	1	2	5	0	5	0	0	0	29	33	62		191
	1269764_1270720_gene	35	37	72	13	8	21	4	4	8	13	3	16	32	42	74		191
	2862296_2863339_gene	18	20	38	8	7	15	18	17	35	17	2	19	42	42	84		191
	580406_580738_gene	16	8	24	5	4	9	37	41	78	6	0	6	34	41	75		192
	1808095_1808943_gene	12	13	25	0	0	0	55	50	105	23	6	29	15	20	35		194
	710548_711672_gene	23	25	48	4	2	6	12	19	31	18	5	23	42	44	86		194
	1887472_1887846_gene	31	26	57	9	9	18	7	11	18	15	3	18	35	48	83		194
	2874050_2874541_gene	27	28	55	7	3	10	4	4	8	10	1	11	43	67	110		194
	666977_668044_gene	27	21	48	11	5	16	19	9	28	30	2	32	33	38	71		195
	208880_209854_gene	23	25	48	6	1	7	12	18	30	13	3	16	53	41	94		195
	2377025_2378293_gene	29	21	50	15	4	19	7	13	20	11	3	14	39	53	92		195
	1812687_1813244_gene	19	21	40	4	4	8	9	5	14	13	7	20	42	71	113		195
	1771492_1772151_gene	29	31	60	9	9	18	1	0	1	13	3	16	48	52	100		195
	2153208_2153477_gene	30	18	48	6	7	13	28	28	56	17	6	23	26	29	55		195
	564280_564888_gene	16	22	38	10	8	18	10	5	15	18	7	25	48	52	100		196
	1936350_1936652_gene	23	19	42	6	9	15	7	9	16	12	3	15	57	52	109		197
	31042_31614_gene	36	37	73	11	7	18	3	2	5	30	6	36	34	31	65		197
	531865_533082_gene	17	17	34	22	15	37	11	28	39	19	3	22	29	37	66		198
	3298613_3300055_gene	31	31	62	16	9	25	16	25	41	10	5	15	28	27	55		198
	2347541_2348062_gene	8	4	12	2	3	5	57	62	119	23	6	29	19	15	34		199
	783098_784345_gene	36	43	79	9	5	14	8	9	17	22	4	26	36	28	64		200
	3282531_3282881_gene	18	24	42	27	23	50	2	0	2	41	7	48	29	29	58		200
	2298566_2299189_gene	34	31	65	6	6	12	12	9	21	11	2	13	42	47	89		200
	1704752_1705174_gene	24	21	45	10	10	20	16	11	27	45	10	55	21	33	54		201
	902587_903186_gene	28	25	53	6	5	11	20	22	42	11	2	13	40	42	82		201
	1226336_1227451_gene	21	23	44	2	1	3	37	38	75	17	3	20	28	31	59		201
	2560179_2560829_gene	16	19	35	1	1	2	42	46	88	37	7	44	15	18	33		202
	2865682_2866578_gene	29	29	58	6	6	12	21	16	37	14	3	17	36	43	79		203
	1145318_1146187_gene	42	41	83	8	5	13	17	19	36	34	5	39	14	19	33		204
	3112690_3113406_gene	17	16	33	6	5	11	8	12	20	5	2	7	73	60	133		204
	3010294_3010827_gene	38	39	77	6	4	10	12	9	21	10	1	11	31	55	86		205
	310567_311841_gene	35	25	60	11	13	24	16	15	31	21	6	27	36	27	63		205
	1423936_1424799_gene	65	68	133	5	3	8	7	13	20	7	1	8	13	23	36		205
	725453_726280_gene	32	32	64	5	5	10	8	4	12	9	3	12	48	60	108		206
	1523916_1524254_gene	19	25	44	12	9	21	4	1	5	34	6	40	41	56	97		207
	2011392_2011712_gene	32	28	60	13	15	28	5	7	12	8	4	12	47	48	95		207
	1891911_1892588_gene	13	11	24	7	5	12	17	20	37	7	4	11	64	59	123		207
	622587_622973_gene	28	32	60	3	3	6	22	35	57	11	3	14	32	39	71		208
	2936021_2936461_gene	22	18	40	3	6	9	18	7	25	22	9	31	51	54	105		210
	2236371_2237177_gene	25	21	46	6	4	10	4	6	10	13	5	18	61	66	127		211
	2307026_2307868_gene	13	10	23	6	4	10	33	24	57	11	2	13	47	61	108		211
	1225771_1226244_gene	25	21	46	4	6	10	26	33	59	11	3	14	40	42	82		211
	1617735_1617893_gene	28	24	52	6	10	16	14	4	18	11	1	12	41	72	113		211
	2388257_2389093_gene	38	35	73	5	4	9	15	13	28	17	9	26	33	43	76		212
	1211847_1212728_gene	51	46	97	2	0	2	34	36	70	12	1	13	15	15	30		212
	3191867_3192844_gene	36	23	59	12	11	23	7	3	10	18	5	23	40	58	98		213
	2902489_2903049_gene	34	45	79	4	6	10	11	19	30	7	1	8	45	41	86		213
	2672763_2673038_gene	14	9	23	3	2	5	36	54	90	7	0	7	43	46	89		214
	2137668_2138096_gene	7	11	18	5	4	9	42	39	81	57	13	70	16	21	37		215
	2489349_2490449_gene	46	45	91	4	8	12	11	10	21	30	8	38	24	29	53		215
	2733597_2734676_gene	11	16	27	15	4	19	16	22	38	14	9	23	47	62	109		216
	2292022_2293080_gene	38	29	67	14	6	20	12	11	23	12	1	13	41	52	93		216
	435144_436007_gene	24	34	58	4	3	7	22	19	41	10	1	11	39	60	99		216
	1025948_1026838_gene	11	14	25	13	7	20	9	2	11	11	0	11	71	79	150		217
	197956_198681_gene	48	44	92	6	4	10	15	19	34	10	2	12	36	33	69		217
	188236_189114_gene	12	12	24	5	0	5	63	45	108	27	5	32	26	24	50		219
	855136_857118_gene	31	28	59	7	11	18	6	13	19	17	4	21	59	45	104		221
	182740_183804_gene	31	26	57	3	7	10	36	27	63	22	5	27	28	36	64		221
	2727588_2727779_gene	14	13	27	1	0	1	45	52	97	56	15	71	8	18	26		222
	1786233_1787075_gene	17	22	39	21	11	32	19	12	31	30	9	39	33	49	82		223
	915296_915874_gene	20	31	51	13	15	28	5	4	9	19	3	22	67	47	114		224
	1382136_1384616_gene	63	70	133	3	0	3	15	16	31	5	0	5	25	27	52		224
	1780694_1781650_gene	16	25	41	9	9	18	18	15	33	25	6	31	51	50	101		224
	278060_280039_gene	45	28	73	10	7	17	6	4	10	10	1	11	63	50	113		224
	2279856_2280614_gene	29	25	54	21	13	34	6	7	13	19	3	22	50	52	102		225
	3071680_3072831_gene	15	15	30	2	0	2	70	63	133	21	4	25	15	20	35		225
	454593_454838_gene	14	14	28	1	1	2	39	55	94	54	11	65	19	17	36		225
	1833912_1835249_gene	33	26	59	11	12	23	7	5	12	17	2	19	59	54	113		226
	298794_299489_gene	10	10	20	15	14	29	5	10	15	10	10	20	71	72	143		227
	937284_937817_gene	22	20	42	15	8	23	7	9	16	28	7	35	54	58	112		228
	137421_137951_gene	28	30	58	9	6	15	14	16	30	30	10	40	36	49	85		228
	925346_926023_gene	30	31	61	7	5	12	32	25	57	23	3	26	26	46	72		228
	1131628_1131972_gene	18	20	38	4	1	5	54	51	105	17	7	24	27	29	56		228
	1502289_1504667_gene	27	24	51	5	6	11	18	12	30	16	9	25	46	65	111		228
	3157636_3158493_gene	44	39	83	4	3	7	32	49	81	31	6	37	8	12	20		228
	2271861_2272199_gene	42	24	66	4	0	4	26	28	54	11	9	20	44	41	85		229
	1078408_1078581_gene	24	23	47	4	4	8	25	28	53	29	3	32	43	46	89		229
	2086223_2086307_gene	41	31	72	1	3	4	6	2	8	17	5	22	51	73	124		230
	2370145_2370606_gene	33	32	65	8	9	17	31	32	63	19	6	25	28	32	60		230
	1371547_1372626_gene	15	15	30	4	13	17	21	20	41	19	7	26	55	62	117		231
	2510199_2511422_gene	37	26	63	19	10	29	7	7	14	21	6	27	43	55	98		231
	1270620_1272107_gene	15	19	34	30	21	51	4	4	8	7	3	10	56	72	128		231
	2235817_2236374_gene	16	23	39	15	13	28	3	4	7	22	7	29	57	72	129		232
	3354133_3354756_gene	42	46	88	5	5	10	19	20	39	20	2	22	35	38	73		232
	3343437_3344153_gene	24	31	55	1	4	5	40	52	92	12	7	19	25	37	62		233
	755316_758165_gene	15	25	40	9	0	9	35	32	67	34	10	44	38	36	74		234
	1181858_1183306_gene	47	33	80	16	13	29	10	6	16	15	2	17	43	49	92		234
	1783428_1784888_gene	14	11	25	17	14	31	10	5	15	23	4	27	65	72	137		235
	2490497_2491720_gene	16	18	34	2	4	6	33	28	61	51	22	73	29	32	61		235
	2880538_2881452_gene	50	36	86	7	9	16	12	15	27	22	5	27	37	42	79		235
	1624710_1626092_gene	29	12	41	26	19	45	9	8	17	38	10	48	39	45	84		235
	1163707_1164264_gene	26	11	37	9	5	14	29	21	50	20	5	25	42	68	110		236
	3288717_3288986_gene	40	38	78	2	5	7	25	28	53	22	2	24	29	46	75		237
	1071615_1071863_gene	25	19	44	8	4	12	9	10	19	29	2	31	60	71	131		237
	1731264_1732214_gene	11	23	34	10	10	20	30	21	51	36	11	47	36	49	85		237
	1445315_1446064_gene	32	21	53	7	8	15	12	16	28	20	9	29	64	48	112		237
	1856669_1857559_gene	31	35	66	3	5	8	26	28	54	16	2	18	53	39	92		238
	972975_973706_gene	26	32	58	10	11	21	9	19	28	9	2	11	51	69	120		238
	1741148_1741543_gene	14	31	45	9	8	17	14	23	37	12	1	13	51	76	127		239
	2877541_2877831_gene	69	58	127	5	2	7	23	14	37	21	2	23	24	21	45		239
	2780889_2781368_gene	30	30	60	4	4	8	35	19	54	23	2	25	44	49	93		240
	3094245_3095414_gene	14	17	31	17	13	30	8	2	10	23	3	26	75	68	143		240
	41587_42348_gene	14	13	27	4	4	8	58	51	109	19	5	24	25	47	72		240
	300258_300827_gene	14	24	38	7	5	12	27	26	53	18	1	19	54	65	119		241
	1402531_1402986_gene	37	28	65	8	1	9	34	62	96	23	4	27	21	23	44		241
	2433697_2434470_gene	24	28	52	13	6	19	10	5	15	14	3	17	62	77	139		242
	3069837_3071399_gene	36	40	76	6	7	13	13	14	27	15	8	23	45	58	103		242
	1060107_1060700_gene	10	11	21	3	2	5	42	38	80	103	16	119	7	10	17		242
	2767087_2767724_misc_RNA	4	12	16	65	44	109	1	1	2	28	7	35	33	47	80		242
	893088_893786_gene	22	30	52	23	20	43	10	7	17	38	3	41	37	53	90		243
	1206678_1207889_gene	25	24	49	16	13	29	3	2	5	26	1	27	58	75	133		243
	3324704_3325876_gene	39	24	63	14	11	25	3	3	6	15	1	16	56	77	133		243
	2937032_2938336_gene	39	27	66	6	2	8	26	22	48	12	4	16	57	49	106		244
	410771_411115_gene	20	34	54	18	14	32	3	0	3	19	6	25	60	70	130		244
	1359266_1359772_gene	39	42	81	10	7	17	37	20	57	18	4	22	37	31	68		245
	306543_308327_gene	36	32	68	3	4	7	34	26	60	31	3	34	40	37	77		246
	1571331_1571621_gene	31	26	57	19	11	30	10	8	18	21	5	26	53	62	115		246
	1180278_1181522_gene	34	24	58	7	8	15	29	35	64	18	3	21	38	50	88		246
	1172002_1173711_gene	30	30	60	16	9	25	34	19	53	31	6	37	28	43	71		246
	1519616_1520191_gene	42	36	78	13	12	25	8	7	15	27	4	31	46	52	98		247
	2680222_2680533_gene	39	26	65	4	3	7	13	13	26	15	6	21	61	68	129		248
	2295562_2296440_gene	30	35	65	13	3	16	18	17	35	23	3	26	53	53	106		248
	1426213_1426413_gene	26	30	56	2	0	2	76	65	141	25	4	29	9	11	20		248
	3038599_3039999_gene	36	26	62	7	3	10	48	38	86	26	7	33	29	28	57		248
	1578477_1578965_gene	28	20	48	0	4	4	54	48	102	14	4	18	38	38	76		248
	1282693_1283979_gene	40	53	93	18	8	26	4	4	8	38	10	48	31	43	74		249
	2614430_2614732_gene	11	11	22	0	0	0	105	83	188	5	2	7	15	17	32		249
	449520_450248_gene	20	27	47	14	18	32	5	4	9	26	6	32	66	64	130		250
	433822_434529_gene	36	53	89	10	8	18	11	12	23	14	4	18	39	63	102		250
	2143360_2143539_gene	37	41	78	13	11	24	9	11	20	21	6	27	45	57	102		251
	54060_54272_gene	53	65	118	13	8	21	15	11	26	20	8	28	28	30	58		251
	563556_564326_gene	29	25	54	14	16	30	13	14	27	24	9	33	43	64	107		251
	1388724_1389992_gene	81	81	162	2	2	4	15	11	26	8	2	10	25	24	49		251
	2532943_2533329_gene	36	51	87	6	9	15	14	9	23	29	9	38	46	43	89		252
	2124889_2126070_gene	27	23	50	35	25	60	3	3	6	12	3	15	55	66	121		252
	14693_15163_gene	53	52	105	2	7	9	32	30	62	18	5	23	25	28	53		252
	2307879_2308379_gene	31	39	70	5	4	9	20	23	43	24	5	29	40	62	102		253
	2471119_2472072_gene	25	16	41	8	6	14	17	21	38	23	6	29	63	68	131		253
	1385926_1386008_misc_RNA	8	13	21	13	17	30	8	7	15	55	16	71	54	62	116		253
	221236_222189_gene	19	11	30	49	23	72	6	6	12	29	5	34	53	54	107		255
	1249801_1250412_gene	12	10	22	2	1	3	78	67	145	51	10	61	12	12	24		255
	621102_621530_gene	24	29	53	12	10	22	4	3	7	22	2	24	70	80	150		256
	423535_424008_gene	16	27	43	8	0	8	46	46	92	24	5	29	42	44	86		258
	2494084_2495133_gene	13	15	28	29	20	49	11	11	22	64	8	72	43	44	87		258
	1887731_1888036_gene	33	36	69	12	12	24	17	13	30	14	4	18	53	64	117		258
	2309199_2309576_gene	53	52	105	7	7	14	26	16	42	19	5	24	39	35	74		259
	1549805_1551085_gene	27	23	50	8	12	20	4	10	14	42	14	56	57	62	119		259
	450232_450777_gene	18	21	39	15	9	24	11	6	17	14	3	17	92	71	163		260
	178308_179678_gene	33	30	63	13	10	23	10	19	29	26	2	28	58	59	117		260
	206346_207494_gene	58	55	113	1	3	4	12	10	22	19	5	24	41	56	97		260
	2054830_2055477_gene	31	24	55	20	9	29	20	12	32	25	7	32	56	57	113		261
	1279271_1280308_gene	42	47	89	6	2	8	15	22	37	12	3	15	48	64	112		261
	1120610_1121521_gene	34	31	65	8	7	15	33	32	65	55	8	63	20	33	53		261
	2217148_2219082_gene	43	30	73	7	5	12	26	18	44	15	2	17	64	51	115		261
	173401_174849_gene	43	41	84	14	7	21	11	8	19	17	6	23	55	59	114		261
	2361172_2362620_gene	49	45	94	19	14	33	10	6	16	11	5	16	44	58	102		261
	2762115_2762843_gene	40	36	76	3	5	8	9	12	21	23	4	27	67	64	131		263
	515576_515872_gene	27	22	49	5	4	9	12	5	17	14	2	16	77	95	172		263
	851432_852325_gene	41	32	73	11	11	22	14	16	30	20	5	25	53	60	113		263
	1836560_1838041_gene	29	37	66	3	3	6	55	69	124	45	4	49	11	8	19		264
	2923755_2924546_gene	32	27	59	5	11	16	8	4	12	14	4	18	62	97	159		264
	1484026_1485051_gene	56	52	108	6	8	14	5	1	6	18	4	22	46	68	114		264
	2574715_2574935_misc_RNA	36	49	85	10	13	23	6	10	16	31	16	47	48	45	93		264
	1802420_1803601_gene	29	24	53	16	9	25	18	15	33	10	3	13	68	73	141		265
	2843865_2845130_gene	21	18	39	14	10	24	17	10	27	20	7	27	72	76	148		265
	1266056_1266838_gene	30	30	60	13	8	21	15	9	24	45	9	54	47	59	106		265
	1301488_1302936_gene	34	31	65	7	8	15	22	16	38	12	6	18	62	68	130		266
	2607641_2608060_gene	21	22	43	20	19	39	3	4	7	27	5	32	67	78	145		266
	2734836_2737097_gene	29	32	61	6	6	12	32	27	59	45	8	53	35	46	81		266
	2725091_2726314_gene	33	37	70	3	10	13	32	27	59	13	4	17	54	53	107		266
	425602_425773_misc_RNA	8	24	32	12	10	22	7	4	11	28	4	32	78	91	169		266
	1977990_1978766_gene	33	27	60	13	14	27	7	1	8	14	6	20	71	80	151		266
	1253246_1254268_gene	27	26	53	23	19	42	10	8	18	37	7	44	52	58	110		267
	3241975_3242469_gene	45	43	88	9	1	10	15	16	31	15	5	20	58	60	118		267
	532985_534310_gene	22	16	38	22	13	35	37	38	75	14	5	19	44	56	100		267
	1358462_1359130_gene	29	26	55	9	20	29	12	17	29	44	17	61	46	47	93		267
	589656_591872_gene	11	12	23	6	1	7	78	84	162	31	10	41	18	16	34		267
	1215182_1215340_misc_RNA	35	37	72	0	0	0	84	61	145	30	8	38	5	8	13		268
	2116840_2117754_gene	36	22	58	5	5	10	44	44	88	31	2	33	35	44	79		268
	1754935_1755492_gene	35	30	65	12	10	22	12	9	21	17	9	26	56	78	134		268
	2433024_2433728_gene	43	45	88	12	8	20	16	10	26	18	5	23	58	53	111		268
	1361650_1362450_gene	26	29	55	8	17	25	22	13	35	6	2	8	61	84	145		268
	2527060_2528262_gene	44	55	99	8	10	18	22	15	37	23	5	28	39	48	87		269
	602739_603809_gene	41	46	87	10	8	18	17	11	28	22	4	26	52	58	110		269
	1300274_1301209_gene	30	41	71	3	6	9	32	49	81	19	6	25	37	46	83		269
	3072810_3073841_gene	18	20	38	2	7	9	74	62	136	19	4	23	30	33	63		269
	669522_670427_gene	23	18	41	17	9	26	7	11	18	37	5	42	73	70	143		270
	2158922_2160232_gene	34	42	76	7	8	15	27	31	58	19	8	27	42	52	94		270
	1884118_1885512_gene	17	21	38	22	15	37	9	11	20	32	4	36	72	69	141		272
	247787_248671_gene	18	22	40	4	7	11	56	57	113	8	7	15	36	57	93		272
	1584510_1584905_gene	26	29	55	25	41	66	1	3	4	42	18	60	40	48	88		273
	1138084_1138551_gene	59	55	114	1	3	4	28	34	62	29	7	36	24	33	57		273
	2877260_2877374_misc_RNA	26	43	69	7	11	18	25	15	40	56	6	62	40	45	85		274
	1752829_1753596_gene	48	32	80	12	9	21	11	6	17	39	6	45	46	65	111		274
	303412_304404_gene	41	48	89	7	6	13	16	13	29	23	7	30	60	54	114		275
	933110_933790_gene	24	9	33	7	6	13	14	5	19	16	6	22	87	102	189		276
	2000166_2001461_gene	35	37	72	16	11	27	12	14	26	30	3	33	55	65	120		278
	1496281_1497456_gene	83	85	168	4	6	10	19	13	32	10	1	11	27	30	57		278
	63669_64400_gene	53	69	122	7	6	13	27	22	49	21	3	24	39	31	70		278
	55046_55741_gene	46	52	98	9	11	20	10	16	26	23	5	28	43	64	107		279
	471886_472266_gene	52	52	104	2	4	6	43	41	84	13	4	17	29	39	68		279
	1448796_1450778_gene	27	22	49	13	5	18	25	20	45	33	3	36	59	73	132		280
	685864_686010_misc_RNA	49	29	78	1	5	6	53	47	100	17	2	19	50	29	79		282
	2918357_2919907_gene	19	19	38	6	14	20	26	20	46	13	2	15	79	84	163		282
	2752866_2753246_gene	47	37	84	3	4	7	39	29	68	20	5	25	45	53	98		282
	21596_22513_gene	56	55	111	6	5	11	26	9	35	18	5	23	46	56	102		282
	934907_935338_gene	48	35	83	21	17	38	9	11	20	38	5	43	44	55	99		283
	1149420_1149698_gene	36	33	69	4	9	13	36	39	75	45	6	51	38	38	76		284
	1744048_1745106_gene	27	37	64	8	10	18	14	14	28	19	4	23	67	84	151		284
	295084_295425_gene	41	46	87	11	5	16	17	25	42	24	6	30	49	61	110		285
	1930486_1931364_gene	42	46	88	10	7	17	22	8	30	19	3	22	45	83	128		285
	640492_641406_gene	21	23	44	23	18	41	3	7	10	41	5	46	70	74	144		285
	937817_938218_gene	50	57	107	10	8	18	8	7	15	17	1	18	49	78	127		285
	1905680_1906420_gene	72	70	142	6	4	10	12	15	27	31	3	34	32	41	73		286
	2803224_2803907_gene	51	57	108	18	10	28	5	7	12	30	4	34	50	55	105		287
	1690550_1691005_gene	40	49	89	2	2	4	38	29	67	19	1	20	58	49	107		287
	2337314_2339911_gene	29	21	50	13	9	22	31	46	77	15	4	19	61	59	120		288
	2644094_2644990_gene	18	25	43	8	4	12	45	35	80	17	6	23	60	71	131		289
	2216481_2217077_gene	37	21	58	9	6	15	37	36	73	34	11	45	47	52	99		290
	1124129_1125010_gene	22	23	45	3	3	6	46	41	87	55	9	64	42	46	88		290
	270036_270569_gene	18	25	43	26	9	35	23	13	36	22	7	29	68	79	147		290
	2903101_2903835_gene	59	47	106	4	3	7	26	23	49	12	0	12	50	67	117		291
	1659724_1660188_gene	49	29	78	11	10	21	16	16	32	15	5	20	57	84	141		292
	2809091_2810077_gene	35	31	66	2	2	4	66	58	124	29	14	43	25	30	55		292
	1359759_1361036_gene	41	37	78	9	5	14	40	48	88	13	3	16	42	54	96		292
	2016663_2018351_gene	27	30	57	15	8	23	11	12	23	13	5	18	86	85	171		292
	1816951_1818279_gene	59	61	120	6	1	7	52	34	86	26	8	34	28	18	46		293
	1325916_1327010_gene	28	62	90	16	11	27	30	20	50	22	10	32	53	42	95		294
	993471_994118_gene	24	31	55	12	9	21	5	6	11	24	5	29	81	98	179		295
	863728_865170_gene	23	33	56	19	10	29	8	12	20	19	4	23	83	84	167		295
	2096467_2096937_gene	52	55	107	7	8	15	36	23	59	23	6	29	38	48	86		296
	1311080_1313467_gene	22	16	38	17	13	30	24	20	44	12	4	16	72	96	168		296
	3030019_3030726_gene	13	12	25	12	20	32	9	14	23	147	24	171	12	33	45		296
	940306_942132_gene	37	24	61	19	21	40	9	5	14	33	7	40	62	80	142		297
	2486847_2488268_gene	26	27	53	13	13	26	11	5	16	23	8	31	85	87	172		298
	1839414_1840010_gene	46	41	87	6	7	13	13	15	28	25	7	32	66	73	139		299
	447822_448265_gene	36	51	87	13	9	22	15	16	31	26	6	32	55	73	128		300
	973918_974985_gene	60	54	114	13	16	29	9	4	13	11	3	14	56	74	130		300
	2327599_2330328_gene	26	35	61	14	9	23	26	33	59	22	7	29	59	69	128		300
	1791042_1791815_gene	43	34	77	7	8	15	27	21	48	41	6	47	48	66	114		301
	732160_732732_gene	31	35	66	5	4	9	37	33	70	12	2	14	66	76	142		301
	1497609_1500533_gene	62	55	117	6	4	10	25	28	53	31	7	38	38	45	83		301
	342646_343626_gene	31	20	51	26	27	53	4	5	9	23	5	28	74	87	161		302
	2109800_2110102_gene	44	40	84	1	1	2	52	56	108	1	0	1	38	70	108		303
	1704272_1704697_gene	25	31	56	9	7	16	18	16	34	27	6	33	79	85	164		303
	2032320_2033210_gene	38	37	75	6	9	15	19	21	40	33	6	39	70	65	135		304
	500626_501411_gene	43	43	86	9	10	19	27	17	44	27	7	34	53	68	121		304
	430045_430818_gene	42	41	83	18	10	28	11	16	27	44	13	57	58	53	111		306
	1154000_1154542_gene	30	27	57	9	8	17	28	19	47	37	10	47	68	71	139		307
	1164904_1165926_gene	52	38	90	10	16	26	13	14	27	27	8	35	50	79	129		307
	898489_899574_gene	15	22	37	18	9	27	35	23	58	33	7	40	72	73	145		307
	932373_933113_gene	50	47	97	8	11	19	5	9	14	16	6	22	63	93	156		308
	263913_264746_gene	36	42	78	31	24	55	4	1	5	39	9	48	59	63	122		308
	262033_262199_misc_RNA	41	30	71	34	38	72	3	7	10	77	15	92	27	37	64		309
	1687745_1688614_gene	40	48	88	6	10	16	11	28	39	39	7	46	63	59	122		311
	861363_861601_misc_RNA	17	22	39	35	14	49	7	18	25	74	12	86	48	64	112		311
	816590_816705_misc_RNA	25	27	52	20	13	33	5	8	13	82	26	108	47	58	105		311
	625407_625988_gene	37	31	68	14	15	29	31	32	63	47	4	51	52	49	101		312
	2045066_2045386_gene	56	58	114	7	16	23	22	26	48	24	5	29	34	66	100		314
	2771352_2771762_gene	53	43	96	1	0	1	67	74	141	30	2	32	26	18	44		314
	1162604_1163122_gene	52	54	106	11	12	23	21	19	40	18	3	21	59	65	124		314
	1117741_1119102_gene	52	31	83	7	10	17	62	58	120	36	12	48	24	23	47		315
	2099347_2099422_gene	25	20	45	20	18	38	19	25	44	47	10	57	69	62	131		315
	120944_122224_gene	34	38	72	19	12	31	15	4	19	25	1	26	82	85	167		315
	2229735_2230280_gene	39	45	84	15	22	37	9	6	15	15	5	20	71	90	161		317
	3268809_3270722_gene	39	38	77	14	4	18	30	28	58	25	8	33	50	82	132		318
	1840168_1840674_gene	32	27	59	30	20	50	9	14	23	46	12	58	52	76	128		318
	1004905_1005492_gene	63	60	123	6	7	13	27	24	51	34	6	40	40	52	92		319
	595977_596597_gene	57	67	124	7	4	11	16	28	44	21	9	30	63	47	110		319
	862556_863731_gene	23	27	50	16	19	35	2	5	7	24	3	27	106	94	200		319
	2031718_2032272_gene	50	45	95	16	13	29	6	4	10	27	4	31	67	88	155		320
	1779352_1780104_gene	57	59	116	6	9	15	16	16	32	24	6	30	54	73	127		320
	1252018_1252986_gene	28	21	49	29	26	55	8	4	12	13	4	17	91	96	187		320
	1446245_1447267_gene	63	38	101	11	11	22	19	17	36	23	6	29	67	67	134		322
	927270_928286_gene	26	29	55	8	21	29	18	18	36	38	8	46	68	88	156		322
	1318791_1319963_gene	53	34	87	20	15	35	11	12	23	25	4	29	70	78	148		322
	2757867_2758424_gene	47	51	98	8	9	17	18	16	34	31	9	40	65	68	133		322
	1649569_1650591_gene	46	58	104	6	12	18	32	22	54	19	6	25	56	66	122		323
	2347009_2347581_gene	21	15	36	6	0	6	85	76	161	38	7	45	39	36	75		323
	225828_226832_gene	8	11	19	1	2	3	121	102	223	31	5	36	20	22	42		323
	55738_56616_gene	37	49	86	30	19	49	9	9	18	45	13	58	43	69	112		323
	1720057_1721379_gene	27	31	58	3	10	13	23	18	41	18	9	27	83	102	185		324
	1619956_1620579_gene	47	45	92	6	5	11	44	56	100	17	4	21	48	52	100		324
	857281_858276_gene	71	78	149	14	10	24	13	7	20	13	4	17	58	56	114		324
	466588_466899_gene	30	39	69	9	1	10	36	23	59	26	5	31	71	85	156		325
	2303373_2305139_gene	40	36	76	11	6	17	27	23	50	18	9	27	69	87	156		326
	1399280_1399738_gene	67	69	136	9	2	11	33	41	74	5	1	6	50	52	102		329
	926020_927270_gene	38	30	68	9	5	14	48	43	91	24	3	27	63	66	129		329
	3254571_3255812_gene	22	21	43	16	14	30	27	17	44	30	3	33	85	94	179		329
	3332222_3333079_gene	30	35	65	19	18	37	10	8	18	33	6	39	91	80	171		330
	2818415_2819647_gene	53	46	99	20	25	45	8	10	18	45	8	53	58	58	116		331
	648782_650032_gene	23	31	54	18	10	28	29	20	49	14	6	20	78	102	180		331
	624654_624914_gene	95	88	183	8	3	11	16	12	28	12	4	16	36	59	95		333
	1652066_1653862_gene	13	9	22	2	4	6	78	80	158	54	21	75	34	39	73		334
	1914091_1915728_gene	42	45	87	12	12	24	35	31	66	20	4	24	68	66	134		335
	2948692_2948783_misc_RNA	33	26	59	19	15	34	18	14	32	46	5	51	61	98	159		335
	1373487_1374296_gene	42	47	89	6	6	12	37	21	58	51	17	68	54	54	108		335
	2101695_2102222_gene	43	38	81	14	16	30	17	18	35	24	5	29	80	81	161		336
	930924_931205_gene	88	101	189	10	6	16	32	31	63	30	5	35	11	22	33		336
	1520302_1521420_gene	35	56	91	19	12	31	8	3	11	39	7	46	73	84	157		336
	2196167_2196733_gene	34	28	62	9	10	19	29	37	66	33	6	39	83	68	151		337
	2394467_2395915_gene	26	23	49	8	4	12	67	72	139	72	16	88	24	25	49		337
	2436055_2437065_gene	38	45	83	11	8	19	16	20	36	30	4	34	68	97	165		337
	2370656_2372533_gene	37	44	81	4	2	6	69	45	114	57	7	64	30	42	72		337
	662946_666464_gene	33	38	71	16	9	25	51	41	92	46	16	62	38	50	88		338
	605145_606578_gene	50	37	87	28	31	59	11	3	14	22	6	28	75	75	150		338
	111300_111641_gene	49	52	101	10	10	20	33	31	64	11	3	14	66	74	140		339
	414141_414740_gene	49	36	85	5	5	10	46	40	86	43	6	49	48	61	109		339
	2761307_2762032_gene	54	47	101	13	4	17	55	43	98	19	4	23	56	45	101		340
	366685_366760_gene	75	75	150	21	21	42	10	9	19	28	4	32	42	56	98		341
	3079540_3079710_gene	35	21	56	11	5	16	16	14	30	16	2	18	102	119	221		341
	580805_581194_gene	55	44	99	9	10	19	8	4	12	23	3	26	93	92	185		341
	1161307_1162599_gene	49	49	98	10	12	22	17	18	35	12	5	17	80	90	170		342
	1072220_1072759_gene	28	27	55	9	5	14	20	32	52	14	7	21	85	115	200		342
	2308402_2309184_gene	42	50	92	7	11	18	44	35	79	19	8	27	67	60	127		343
	3384024_3384380_gene	94	77	171	9	7	16	15	13	28	9	3	12	53	63	116		343
	2938631_2939434_gene	25	23	48	19	21	40	20	16	36	129	24	153	38	28	66		343
	3335450_3335764_gene	60	51	111	15	15	30	13	15	28	17	7	24	72	78	150		343
	3183761_3184573_gene	36	30	66	4	10	14	32	41	73	50	14	64	60	67	127		344
	2122839_2123741_gene	25	15	40	2	4	6	64	60	124	76	23	99	34	41	75		344
	364946_365021_gene	56	39	95	12	16	28	14	21	35	17	5	22	85	81	166		346
	247292_247900_gene	132	116	248	2	2	4	4	5	9	3	1	4	38	43	81		346
	517068_517337_gene	37	37	74	19	13	32	35	28	63	26	8	34	65	78	143		346
	3370964_3371818_gene	48	43	91	8	9	17	38	34	72	12	4	16	67	84	151		347
	256774_258363_gene	50	32	82	13	16	29	18	26	44	39	8	47	65	80	145		347
	2969395_2970147_gene	44	45	89	19	9	28	25	12	37	51	10	61	63	69	132		347
	2282734_2283003_gene	46	52	98	7	5	12	66	77	143	23	7	30	29	36	65		348
	1787083_1788993_gene	43	37	80	16	17	33	38	27	65	29	12	41	63	66	129		348
	2867415_2867524_misc_RNA	14	17	31	12	17	29	34	35	69	59	15	74	71	75	146		349
	2588112_2589086_gene	38	40	78	4	7	11	44	35	79	18	2	20	61	101	162		350
	1102961_1103162_misc_RNA	47	52	99	26	10	36	28	24	52	34	6	40	66	57	123		350
	1176202_1177704_gene	38	30	68	6	9	15	34	37	71	32	6	38	84	75	159		351
	3300903_3301193_gene	96	102	198	3	2	5	21	29	50	16	3	19	37	42	79		351
	834336_834578_gene	54	37	91	7	4	11	43	38	81	34	4	38	58	73	131		352
	1626117_1627064_gene	40	42	82	36	42	78	15	2	17	62	21	83	43	49	92		352
	1599656_1600648_gene	41	41	82	10	5	15	24	16	40	26	3	29	81	106	187		353
	2507832_2508551_gene	59	33	92	13	11	24	23	18	41	28	8	36	68	92	160		353
	2968179_2969360_gene	71	49	120	8	10	18	23	24	47	23	6	29	65	74	139		353
	2099215_2099290_gene	32	24	56	25	19	44	25	17	42	38	8	46	87	79	166		354
	1596957_1599569_gene	38	47	85	18	11	29	16	13	29	46	8	54	60	97	157		354
	2903857_2904405_gene	48	44	92	14	8	22	21	25	46	17	2	19	83	93	176		355
	2729291_2730136_gene	37	47	84	16	12	28	12	13	25	23	7	30	86	104	190		357
	1636053_1637093_gene	86	68	154	16	8	24	21	23	44	17	3	20	51	64	115		357
	1753919_1754407_gene	31	25	56	27	16	43	18	19	37	23	7	30	85	107	192		358
	264958_267087_gene	29	43	72	6	5	11	71	42	113	30	7	37	66	59	125		358
	2389117_2389440_misc_RNA	21	29	50	25	17	42	15	8	23	86	20	106	58	79	137		358
	2314344_2315951_gene	26	34	60	9	5	14	71	45	116	55	17	72	38	59	97		359
	3045394_3046194_gene	36	52	88	7	6	13	40	46	86	28	11	39	57	76	133		359
	1141102_1142019_gene	48	48	96	15	13	28	44	33	77	69	12	81	43	34	77		359
	1135190_1135290_misc_RNA	48	43	91	11	10	21	39	37	76	30	5	35	66	70	136		359
	2720506_2721324_gene	43	48	91	11	14	25	52	30	82	8	3	11	67	83	150		359
	2120771_2121958_gene	26	19	45	22	18	40	11	11	22	14	5	19	90	144	234		360
	2769090_2769719_gene	34	43	77	10	13	23	22	11	33	9	2	11	103	114	217		361
	1582897_1583661_gene	37	24	61	42	42	84	5	12	17	42	14	56	76	68	144		362
	970769_971278_gene	41	57	98	11	8	19	16	21	37	33	8	41	79	88	167		362
	3353070_3354149_gene	57	65	122	15	13	28	17	13	30	27	7	34	58	91	149		363
	3306596_3307015_gene	41	32	73	7	16	23	34	18	52	31	12	43	81	91	172		363
	309672_310310_gene	54	41	95	13	11	24	27	35	62	24	15	39	71	72	143		363
	2110585_2111865_gene	25	14	39	21	17	38	5	12	17	25	3	28	109	132	241		363
	3223904_3225208_gene	43	43	86	7	7	14	39	45	84	45	13	58	47	74	121		363
	565504_566067_gene	30	33	63	11	15	26	9	30	39	37	6	43	82	110	192		363
	1250582_1251484_gene	39	24	63	5	3	8	38	53	91	48	12	60	67	74	141		363
	3018077_3019402_gene	37	44	81	28	17	45	17	21	38	29	7	36	71	93	164		364
	2502575_2503549_gene	34	56	90	11	11	22	25	16	41	16	5	21	101	89	190		364
	1105579_1105974_gene	19	31	50	0	1	1	98	106	204	62	17	79	13	17	30		364
	347619_348296_gene	127	139	266	7	8	15	2	1	3	10	1	11	37	33	70		365
	1401419_1402483_gene	58	56	114	13	13	26	28	28	56	32	6	38	68	64	132		366
	2654814_2655452_gene	42	34	76	14	3	17	63	60	123	27	5	32	60	59	119		367
	1320049_1321236_gene	46	45	91	12	11	23	16	25	41	29	3	32	80	101	181		368
	2796852_2797409_gene	51	47	98	11	16	27	17	10	27	47	14	61	70	86	156		369
	2548822_2549075_misc_RNA	27	34	61	37	31	68	12	10	22	74	15	89	61	69	130		370
	3315903_3316628_gene	68	61	129	4	7	11	39	33	72	31	9	40	56	62	118		370
	652576_652956_gene	56	58	114	10	7	17	44	27	71	41	5	46	48	75	123		371
	3076573_3076917_gene	50	54	104	4	4	8	62	56	118	27	12	39	59	44	103		372
	314443_314877_gene	36	33	69	27	26	53	4	6	10	70	23	93	76	71	147		372
	2674400_2675338_gene	104	115	219	9	4	13	28	18	46	13	3	16	41	37	78		372
	520139_520819_gene	52	46	98	20	20	40	7	8	15	42	6	48	86	86	172		373
	3374990_3375092_misc_RNA	35	32	67	43	33	76	8	9	17	24	5	29	87	97	184		373
	1524359_1525801_gene	15	22	37	13	16	29	15	18	33	24	4	28	130	116	246		373
	2470488_2470889_gene	13	22	35	8	5	13	103	94	197	53	15	68	28	32	60		373
	2018348_2020888_gene	42	52	94	18	9	27	21	17	38	16	6	22	97	95	192		373
	2173974_2174645_gene	48	76	124	5	11	16	7	14	21	22	3	25	78	110	188		374
	352355_353401_gene	45	52	97	10	8	18	18	8	26	23	4	27	93	113	206		374
	2222680_2223885_gene	68	69	137	5	2	7	41	44	85	32	5	37	48	60	108		374
	1778154_1779101_gene	50	46	96	14	12	26	35	30	65	24	2	26	67	94	161		374
	903183_904097_gene	50	50	100	12	9	21	71	56	127	21	5	26	49	52	101		375
	514072_514818_gene	27	31	58	17	18	35	10	14	24	37	8	45	97	116	213		375
	1533945_1535354_gene	35	28	63	11	4	15	53	46	99	23	6	29	82	89	171		377
	351696_352358_gene	45	52	97	31	38	69	11	14	25	57	16	73	57	57	114		378
	1666420_1666809_gene	40	46	86	13	20	33	34	33	67	44	10	54	60	78	138		378
	1640925_1641326_gene	7	10	17	4	2	6	151	142	293	23	11	34	17	11	28		378
	2811202_2811894_gene	63	65	128	19	12	31	18	26	44	48	10	58	53	65	118		379
	837669_837871_misc_RNA	50	60	110	19	15	34	32	21	53	43	19	62	63	58	121		380
	792628_793065_gene	55	40	95	32	19	51	16	9	25	24	3	27	98	85	183		381
	44731_46254_gene	48	49	97	17	23	40	33	31	64	12	2	14	77	89	166		381
	3106043_3106903_gene	37	36	73	12	12	24	17	26	43	31	5	36	98	110	208		384
	3315396_3315797_gene	44	22	66	26	28	54	20	12	32	21	7	28	97	107	204		384
	238035_238448_gene	47	38	85	9	13	22	24	23	47	28	7	35	90	105	195		384
	1048112_1049089_gene	43	37	80	4	8	12	37	35	72	38	9	47	80	94	174		385
	913515_914291_gene	58	51	109	19	18	37	24	20	44	32	14	46	66	84	150		386
	592883_593203_gene	63	63	126	11	5	16	23	20	43	31	5	36	77	88	165		386
	411825_412167_misc_RNA	67	53	120	17	14	31	17	24	41	39	7	46	79	69	148		386
	286103_286990_gene	43	50	93	17	22	39	14	16	30	50	13	63	77	85	162		387
	1639917_1640726_gene	27	25	52	26	9	35	3	4	7	14	4	18	127	148	275		387
	604481_605014_gene	58	52	110	8	10	18	39	39	78	40	13	53	60	69	129		388
	38093_39007_gene	84	73	157	11	15	26	23	25	48	23	6	29	60	68	128		388
	2176986_2178326_gene	118	110	228	5	3	8	35	33	68	23	10	33	32	20	52		389
	462427_463776_gene	50	43	93	55	39	94	3	6	9	72	20	92	51	50	101		389
	1266926_1268005_gene	29	32	61	20	7	27	33	30	63	33	6	39	101	99	200		390
	2231815_2232465_gene	76	61	137	11	8	19	30	23	53	50	8	58	57	67	124		391
	2395991_2397271_gene	49	34	83	10	5	15	32	18	50	20	4	24	102	117	219		391
	2187982_2189373_gene	156	162	318	1	6	7	4	2	6	7	2	9	24	27	51		391
	1367039_1368013_gene	70	77	147	6	8	14	20	14	34	16	6	22	75	100	175		392
	3305184_3306362_gene	44	61	105	3	4	7	90	63	153	30	7	37	46	45	91		393
	2387854_2388234_gene	149	117	266	4	1	5	21	21	42	16	1	17	22	43	65		395
	2825042_2826304_gene	43	51	94	25	14	39	7	3	10	41	6	47	100	105	205		395
	1635309_1635980_gene	53	61	114	11	12	23	45	40	85	27	7	34	66	74	140		396
	262200_263765_gene	38	38	76	39	23	62	9	2	11	66	14	80	74	94	168		397
	2185359_2186648_gene	48	39	87	16	16	32	35	33	68	45	14	59	73	78	151		397
	1638274_1639863_gene	62	56	118	10	9	19	17	19	36	33	5	38	92	94	186		397
	1931484_1932485_gene	59	68	127	9	4	13	42	46	88	34	14	48	39	83	122		398
	2454375_2455283_gene	43	42	85	8	6	14	80	79	159	67	17	84	21	35	56		398
	1646838_1648163_gene	23	14	37	5	11	16	85	97	182	46	15	61	46	57	103		399
	396992_398359_gene	47	41	88	23	25	48	9	9	18	30	6	36	105	105	210		400
	833217_834221_gene	51	68	119	15	17	32	14	24	38	25	11	36	87	88	175		400
	327062_328561_gene	35	40	75	15	16	31	30	47	77	20	6	26	88	104	192		401
	2178619_2179743_gene	61	56	117	3	3	6	63	56	119	40	13	53	38	68	106		401
	2644957_2645730_gene	46	59	105	12	14	26	30	30	60	28	6	34	90	87	177		402
	2856264_2857940_gene	36	30	66	11	6	17	44	53	97	23	5	28	79	115	194		402
	2575202_2575693_gene	36	28	64	12	5	17	49	55	104	55	15	70	64	84	148		403
	2621794_2622267_gene	78	67	145	11	8	19	27	31	58	18	4	22	79	80	159		403
	2868674_2869693_gene	19	13	32	3	6	9	78	75	153	77	15	92	56	61	117		403
	510663_511514_gene	50	49	99	10	8	18	45	38	83	46	11	57	59	88	147		404
	40298_41323_gene	44	49	93	20	12	32	20	21	41	20	3	23	103	113	216		405
	3106900_3108897_gene	73	85	158	16	18	34	13	17	30	23	7	30	70	83	153		405
	1227719_1228783_gene	53	53	106	27	32	59	24	16	40	21	2	23	90	90	180		408
	1292948_1294042_gene	7	13	20	3	3	6	136	125	261	31	14	45	37	39	76		408
	84555_84869_gene	115	122	237	8	3	11	11	13	24	19	7	26	40	71	111		409
	235777_236475_gene	50	53	103	17	13	30	31	19	50	53	14	67	69	90	159		409
	1849247_1850650_gene	36	39	75	20	25	45	13	16	29	30	4	34	111	117	228		411
	3382233_3382820_gene	51	58	109	23	23	46	22	18	40	40	6	46	80	91	171		412
	3028993_3029880_gene	44	28	72	9	3	12	107	96	203	17	6	23	52	50	102		412
	3141618_3141702_gene	84	84	168	8	4	12	28	16	44	20	5	25	69	95	164		413
	625023_625397_gene	49	53	102	13	6	19	50	54	104	42	10	52	54	83	137		414
	2981411_2981537_misc_RNA	36	45	81	22	18	40	15	11	26	128	38	166	36	65	101		414
	1618972_1619718_gene	72	70	142	11	13	24	18	14	32	20	5	25	96	95	191		414
	2280607_2281209_gene	57	53	110	33	31	64	8	16	24	43	15	58	78	81	159		415
	1680081_1682630_gene	47	38	85	9	7	16	91	77	168	25	11	36	48	62	110		415
	891810_892289_gene	66	37	103	20	19	39	16	9	25	38	6	44	94	110	204		415
	2224682_2225995_gene	26	33	59	8	3	11	86	58	144	73	18	91	47	63	110		415
	733666_734784_gene	56	38	94	8	5	13	46	41	87	37	8	45	83	94	177		416
	715277_715930_gene	31	43	74	26	17	43	31	31	62	51	14	65	85	87	172		416
	2730149_2731864_gene	50	43	93	30	15	45	11	12	23	37	2	39	99	117	216		416
	3236205_3236681_gene	52	68	120	23	13	36	13	16	29	24	11	35	99	97	196		416
	2756759_2757232_gene	42	33	75	4	2	6	92	92	184	30	14	44	50	58	108		417
	365199_365272_gene	55	57	112	18	17	35	10	8	18	32	12	44	102	108	210		419
	1335128_1335583_gene	18	20	38	4	6	10	104	101	205	40	8	48	59	59	118		419
	2073781_2075442_gene	37	42	79	73	68	141	5	4	9	86	17	103	42	46	88		420
	1193984_1195243_gene	68	56	124	11	5	16	64	85	149	55	14	69	26	36	62		420
	2193697_2194470_gene	117	119	236	5	3	8	30	19	49	56	17	73	29	27	56		422
	1263574_1264077_gene	55	63	118	16	10	26	24	30	54	57	13	70	77	77	154		422
	1368713_1371382_gene	60	43	103	16	15	31	30	40	70	30	9	39	86	93	179		422
	69976_71334_gene	32	36	68	29	22	51	46	34	80	24	8	32	91	101	192		423
	2654276_2654839_gene	40	40	80	20	14	34	37	52	89	57	15	72	74	75	149		424
	2430958_2431470_gene	111	106	217	8	11	19	12	8	20	51	13	64	55	51	106		426
	3260567_3261202_gene	89	69	158	15	14	29	18	12	30	43	8	51	76	82	158		426
	3009539_3010297_gene	54	54	108	11	18	29	11	15	26	41	7	48	101	114	215		426
	2925333_2926082_gene	60	74	134	16	15	31	14	22	36	43	12	55	83	87	170		426
	2732983_2733534_gene	63	61	124	26	10	36	10	11	21	27	4	31	88	126	214		426
	1332772_1333404_gene	52	77	129	38	22	60	7	8	15	49	17	66	81	78	159		429
	2744997_2745716_gene	59	37	96	3	2	5	95	132	227	38	16	54	22	25	47		429
	3164142_3164939_gene	76	47	123	17	17	34	23	21	44	40	4	44	72	113	185		430
	1873124_1874632_gene	23	17	40	6	5	11	122	129	251	42	5	47	45	37	82		431
	2976210_2977781_gene	53	45	98	23	16	39	31	28	59	40	11	51	77	107	184		431
	3236727_3237716_gene	66	47	113	23	22	45	18	7	25	36	8	44	81	124	205		432
	1148725_1149417_gene	55	59	114	12	19	31	50	46	96	78	9	87	45	59	104		432
	2504988_2506124_gene	87	100	187	6	7	13	34	30	64	26	5	31	63	74	137		432
	1629680_1629994_gene	22	29	51	28	24	52	25	19	44	59	13	72	103	110	213		432
	1656922_1657860_gene	104	89	193	8	5	13	23	28	51	21	6	27	57	92	149		433
	3361982_3362950_gene	51	52	103	21	14	35	46	29	75	57	11	68	66	87	153		434
	1232861_1234189_gene	34	46	80	9	14	23	26	28	54	29	9	38	119	120	239		434
	1071092_1071514_gene	17	31	48	19	11	30	10	6	16	62	15	77	102	162	264		435
	616847_617326_gene	76	75	151	6	8	14	13	19	32	13	0	13	103	124	227		437
	1877800_1879002_gene	94	80	174	6	7	13	37	38	75	65	18	83	51	41	92		437
	1407804_1408175_gene	63	54	117	7	5	12	72	49	121	28	4	32	89	66	155		437
	3182643_3183653_gene	19	27	46	4	1	5	92	61	153	104	29	133	50	51	101		438
	1386688_1387428_gene	86	82	168	11	8	19	21	17	38	27	15	42	87	84	171		438
	1776653_1777723_gene	69	69	138	9	13	22	23	21	44	19	7	26	108	102	210		440
	2892852_2894309_gene	56	42	98	22	25	47	3	9	12	35	12	47	113	123	236		440
	2894489_2895076_gene	59	71	130	10	10	20	45	42	87	42	11	53	68	82	150		440
	2791213_2791980_gene	43	48	91	12	6	18	17	28	45	34	7	41	117	129	246		441
	1163106_1163744_gene	29	42	71	4	14	18	49	39	88	15	9	24	122	118	240		441
	1114601_1117744_gene	78	52	130	5	7	12	46	48	94	66	12	78	62	65	127		441
	2727146_2727439_gene	76	64	140	29	15	44	20	21	41	35	7	42	78	97	175		442
	2931036_2931452_gene	77	66	143	20	16	36	17	5	22	27	4	31	97	113	210		442
	2319208_2325153_gene	56	51	107	10	12	22	69	53	122	31	7	38	70	84	154		443
	3257398_3258462_gene	110	88	198	7	7	14	40	40	80	28	4	32	61	59	120		444
	2668117_2669316_gene	32	28	60	21	13	34	48	45	93	42	11	53	100	105	205		445
	125843_126883_gene	77	66	143	10	24	34	22	12	34	23	7	30	93	112	205		446
	1392035_1393354_gene	94	83	177	14	5	19	33	28	61	28	2	30	78	82	160		447
	971284_971661_gene	98	68	166	6	3	9	32	30	62	31	8	39	83	88	171		447
	2481832_2482464_gene	53	56	109	17	19	36	16	20	36	23	4	27	127	113	240		448
	198678_199463_gene	69	72	141	12	5	17	49	49	98	28	4	32	82	79	161		449
	1289130_1291397_gene	20	15	35	6	3	9	145	122	267	36	9	45	43	52	95		451
	1871705_1872022_gene	56	62	118	4	5	9	53	44	97	9	2	11	106	110	216		451
	2568684_2569922_gene	29	28	57	8	6	14	102	90	192	60	22	82	41	66	107		452
	1894092_1894811_gene	72	60	132	13	16	29	20	17	37	44	9	53	102	100	202		453
	1724886_1727105_gene	79	49	128	8	8	16	28	23	51	11	3	14	107	137	244		453
	155245_155430_gene	34	34	68	14	19	33	55	47	102	66	13	79	80	92	172		454
	1248771_1249823_gene	24	15	39	4	2	6	159	134	293	41	15	56	32	29	61		455
	3080710_3081960_gene	120	124	244	7	10	17	31	22	53	26	4	30	56	56	112		456
	673832_674497_gene	69	83	152	24	19	43	19	18	37	45	9	54	72	99	171		457
	1512004_1512906_gene	53	51	104	9	10	19	33	33	66	26	12	38	99	131	230		457
	2358599_2358694_misc_RNA	32	35	67	23	18	41	42	49	91	101	37	138	60	60	120		457
	1275652_1276848_gene	37	38	75	36	30	66	17	26	43	49	9	58	118	97	215		457
	3027690_3028718_gene	57	68	125	9	5	14	44	22	66	27	8	35	112	105	217		457
	658289_658666_gene	51	51	102	25	14	39	42	32	74	30	3	33	106	104	210		458
	1119060_1120613_gene	65	75	140	13	4	17	62	62	124	69	15	84	41	53	94		459
	446478_447068_gene	57	56	113	18	16	34	24	22	46	20	11	31	114	122	236		460
	723047_723319_gene	16	9	25	5	5	10	148	113	261	118	30	148	3	13	16		460
	2887612_2888094_gene	42	27	69	28	22	50	18	24	42	51	10	61	112	127	239		461
	2637405_2637683_gene	23	20	43	0	0	0	180	171	351	33	9	42	7	19	26		462
	347089_347622_gene	62	40	102	7	7	14	25	29	54	35	8	43	122	127	249		462
	241716_243683_gene	63	48	111	19	11	30	43	46	89	41	10	51	89	92	181		462
	2846499_2847059_gene	55	58	113	46	33	79	17	5	22	12	7	19	113	116	229		462
	1876344_1877213_gene	37	30	67	19	13	32	17	22	39	26	5	31	138	156	294		463
	1648274_1649515_gene	114	92	206	2	8	10	42	46	88	47	9	56	55	48	103		463
	2545546_2546838_gene	20	22	42	2	6	8	128	136	264	13	2	15	56	78	134		463
	3087363_3088487_gene	78	93	171	17	9	26	49	38	87	33	7	40	74	66	140		464
	479014_479274_gene	47	43	90	12	5	17	41	29	70	50	17	67	101	119	220		464
	2199220_2200530_gene	103	111	214	7	7	14	11	15	26	13	5	18	93	99	192		464
	2003691_2003953_misc_RNA	106	104	210	27	27	54	5	3	8	70	25	95	43	54	97		464
	1789603_1790922_gene	41	40	81	18	24	42	20	16	36	18	4	22	136	147	283		464
	1368030_1368293_gene	93	67	160	4	3	7	53	69	122	13	5	18	71	86	157		464
	852319_853338_gene	48	41	89	22	27	49	14	7	21	34	8	42	118	146	264		465
	243721_244344_gene	60	79	139	17	13	30	66	56	122	25	6	31	61	83	144		466
	2798044_2799759_gene	68	66	134	14	11	25	48	56	104	45	9	54	71	79	150		467
	1067616_1068374_gene	77	99	176	27	26	53	11	9	20	45	13	58	72	88	160		467
	2709638_2710984_gene	15	16	31	1	2	3	138	110	248	106	18	124	23	38	61		467
	2721767_2723764_gene	38	40	78	2	4	6	172	170	342	15	3	18	15	8	23		467
	3030713_3032560_gene	51	50	101	12	12	24	66	68	134	53	17	70	66	72	138		467
	1895076_1896758_gene	137	148	285	7	1	8	37	32	69	26	5	31	30	45	75		468
	2551374_2552072_gene	93	111	204	15	21	36	17	15	32	74	15	89	50	57	107		468
	184405_184920_gene	71	84	155	11	6	17	21	13	34	31	7	38	103	122	225		469
	2753605_2754795_gene	45	44	89	17	14	31	32	24	56	46	10	56	112	125	237		469
	953282_954424_gene	57	39	96	3	4	7	117	88	205	43	15	58	59	45	104		470
	1801305_1802288_gene	59	60	119	19	14	33	25	20	45	29	5	34	127	112	239		470
	1488183_1489718_gene	62	56	118	20	11	31	9	5	14	31	4	35	128	144	272		470
	1304045_1304659_gene	81	74	155	40	45	85	19	9	28	54	10	64	48	92	140		472
	91808_92371_gene	63	45	108	14	12	26	53	26	79	52	8	60	85	114	199		472
	1987723_1988124_gene	62	91	153	6	2	8	73	81	154	58	18	76	38	44	82		473
	672196_673677_gene	45	43	88	14	14	28	33	36	69	37	9	46	112	130	242		473
	506035_506472_gene	125	132	257	20	23	43	3	4	7	35	3	38	64	64	128		473
	197445_197855_gene	96	79	175	12	18	30	37	42	79	20	8	28	80	83	163		475
	3251055_3252065_gene	72	43	115	22	10	32	79	50	129	41	16	57	55	89	144		477
	2270563_2271624_gene	60	73	133	33	21	54	9	13	22	75	18	93	84	91	175		477
	2989553_2990212_gene	52	53	105	31	24	55	4	6	10	46	13	59	128	121	249		478
	259343_260740_gene	72	52	124	18	15	33	24	21	45	45	20	65	95	117	212		479
	3181506_3182465_gene	95	85	180	29	20	49	8	7	15	66	20	86	75	75	150		480
	2523344_2524096_gene	48	42	90	23	13	36	67	69	136	51	10	61	69	88	157		480
	834580_835104_gene	48	52	100	10	7	17	73	70	143	45	11	56	79	86	165		481
	2700982_2702220_gene	92	95	187	11	12	23	30	26	56	23	5	28	95	94	189		483
	1240718_1242226_gene	32	48	80	9	10	19	65	53	118	90	25	115	64	89	153		485
	2030529_2031602_gene	61	54	115	43	30	73	17	15	32	50	9	59	100	106	206		485
	642300_643607_gene	58	47	105	19	15	34	41	40	81	45	10	55	103	107	210		485
	1065913_1067058_gene	103	104	207	10	4	14	67	53	120	32	7	39	57	49	106		486
	3240854_3241972_gene	95	77	172	29	21	50	6	8	14	35	6	41	97	112	209		486
	1963058_1963696_gene	65	76	141	13	7	20	74	84	158	91	17	108	21	38	59		486
	469036_470088_gene	61	56	117	15	12	27	63	66	129	41	12	53	80	81	161		487
	2871814_2872221_gene	67	56	123	16	8	24	22	31	53	27	7	34	115	138	253		487
	1133866_1134072_gene	78	93	171	6	5	11	67	62	129	29	7	36	76	66	142		489
	1309096_1310988_gene	34	34	68	12	11	23	43	34	77	18	11	29	148	144	292		489
	961896_962789_gene	69	59	128	16	22	38	27	28	55	40	13	53	97	118	215		489
	1324284_1324883_gene	55	53	108	23	18	41	39	20	59	45	8	53	98	131	229		490
	451779_452663_gene	53	41	94	43	34	77	20	17	37	49	13	62	106	114	220		490
	1328312_1329250_gene	61	57	118	24	17	41	16	18	34	43	11	54	115	130	245		492
	1621003_1622601_gene	79	101	180	11	8	19	63	49	112	33	11	44	66	72	138		493
	365094_365178_gene	77	65	142	7	9	16	14	9	23	28	6	34	123	155	278		493
	601595_601993_gene	68	70	138	6	11	17	66	68	134	37	10	47	67	90	157		493
	1413144_1414394_gene	71	68	139	31	26	57	38	32	70	55	15	70	83	74	157		493
	1657932_1658474_gene	130	161	291	13	10	23	20	23	43	29	8	37	48	52	100		494
	120045_120641_gene	30	38	68	6	11	17	65	61	126	72	20	92	96	95	191		494
	2707622_2708821_gene	69	71	140	29	21	50	15	11	26	51	9	60	101	118	219		495
	118383_119243_gene	68	54	122	17	19	36	38	39	77	43	7	50	102	108	210		495
	2255112_2255900_gene	86	65	151	21	8	29	50	66	116	24	8	32	78	90	168		496
	1420826_1421371_gene	35	38	73	15	12	27	85	94	179	54	10	64	82	74	156		499
	219993_220859_gene	116	98	214	10	11	21	43	60	103	85	21	106	28	27	55		499
	3192992_3194248_gene	69	71	140	8	6	14	74	87	161	28	3	31	78	76	154		500
	1393322_1394122_gene	136	145	281	8	11	19	23	24	47	22	4	26	64	63	127		500
	1994606_1995757_gene	66	64	130	6	7	13	82	91	173	92	40	132	24	28	52		500
	1134218_1134745_gene	92	75	167	19	14	33	25	21	46	55	13	68	90	97	187		501
	3126_4187_gene	45	32	77	19	16	35	18	20	38	55	13	68	128	155	283		501
	1217834_1218574_gene	83	75	158	7	3	10	74	60	134	25	6	31	80	89	169		502
	2457486_2458892_gene	109	104	213	18	7	25	12	18	30	37	8	45	84	106	190		503
	422627_423346_gene	88	80	168	4	2	6	40	35	75	26	5	31	100	123	223		503
	742489_744636_gene	82	71	153	19	15	34	14	25	39	38	6	44	97	137	234		504
	130773_132017_gene	94	85	179	17	15	32	35	44	79	38	12	50	82	83	165		505
	904094_905425_gene	76	85	161	12	24	36	38	33	71	43	7	50	80	108	188		506
	19643_20716_gene	78	90	168	11	15	26	54	61	115	45	14	59	52	86	138		506
	1280973_1281635_gene	13	13	26	3	1	4	135	137	272	66	21	87	56	62	118		507
	302309_303355_gene	67	50	117	9	8	17	30	31	61	40	17	57	123	132	255		507
	2443964_2447119_gene	49	50	99	10	8	18	86	86	172	69	21	90	62	68	130		509
	39042_40235_gene	105	72	177	22	9	31	35	26	61	26	7	33	103	107	210		512
	3156673_3157410_gene	88	85	173	15	9	24	17	17	34	29	13	42	113	126	239		512
	1939747_1940736_gene	85	92	177	17	26	43	33	24	57	53	13	66	73	97	170		513
	2986905_2989412_gene	97	88	185	13	1	14	80	75	155	40	8	48	54	57	111		513
	1943220_1943684_gene	62	52	114	9	15	24	68	60	128	36	10	46	96	105	201		513
	587251_587850_gene	107	85	192	15	21	36	37	21	58	69	14	83	74	71	145		514
	2367160_2368566_gene	56	46	102	31	36	67	25	25	50	66	12	78	99	118	217		514
	47016_48011_gene	82	87	169	29	14	43	6	10	16	57	12	69	107	114	221		518
	1537306_1537734_gene	55	47	102	38	26	64	23	17	40	36	5	41	116	155	271		518
	1906498_1906863_gene	55	40	95	29	22	51	15	24	39	41	10	51	134	148	282		518
	155787_156479_gene	62	40	102	58	52	110	1	2	3	72	16	88	101	115	216		519
	2995794_2996891_gene	95	90	185	12	9	21	49	52	101	36	11	47	81	85	166		520
	2456333_2457385_gene	90	100	190	6	5	11	54	43	97	19	5	24	78	120	198		520
	3152012_3153988_gene	77	69	146	23	12	35	29	30	59	40	13	53	108	120	228		521
	2437187_2438290_gene	81	70	151	24	18	42	22	23	45	25	10	35	116	132	248		521
	2495865_2497145_gene	74	64	138	12	7	19	59	64	123	89	25	114	57	71	128		522
	3317252_3317989_gene	57	64	121	36	37	73	19	18	37	66	20	86	82	124	206		523
	2560946_2561236_gene	44	39	83	0	0	0	158	169	327	32	10	42	40	31	71		523
	2086635_2086711_gene	42	34	76	43	46	89	9	4	13	60	12	72	136	138	274		524
	308513_308911_gene	39	44	83	73	64	137	6	10	16	69	24	93	91	104	195		524
	1323571_1324290_gene	34	46	80	27	24	51	39	36	75	55	11	66	114	138	252		524
	678519_679067_gene	48	40	88	40	38	78	41	44	85	73	19	92	94	89	183		526
	1324880_1325938_gene	51	45	96	22	20	42	33	45	78	45	8	53	126	131	257		526
	2787624_2787851_gene	63	66	129	22	20	42	15	24	39	58	24	82	99	137	236		528
	3084000_3085289_gene	81	69	150	7	12	19	48	46	94	41	9	50	102	113	215		528
	2129542_2130546_gene	81	73	154	18	31	49	24	20	44	43	16	59	89	135	224		530
	1368280_1368645_gene	98	89	187	9	5	14	53	46	99	23	12	35	87	109	196		531
	2352473_2352970_gene	25	22	47	0	4	4	199	186	385	33	9	42	28	25	53		531
	762468_763319_gene	70	68	138	23	19	42	24	15	39	32	6	38	128	146	274		531
	285047_285979_gene	51	61	112	38	33	71	20	19	39	64	17	81	110	118	228		531
	2114494_2114973_gene	75	64	139	16	13	29	24	20	44	47	8	55	132	132	264		531
	1701368_1701544_gene	49	58	107	41	26	67	6	9	15	51	14	65	133	145	278		532
	2561327_2561638_gene	75	62	137	15	17	32	51	44	95	37	14	51	114	103	217		532
	1204272_1205240_gene	107	104	211	19	20	39	17	13	30	30	5	35	109	108	217		532
	1545984_1546325_gene	79	67	146	11	6	17	42	45	87	34	9	43	109	132	241		534
	2305136_2306944_gene	74	74	148	20	15	35	34	26	60	42	9	51	118	122	240		534
	633437_633898_gene	47	28	75	74	69	143	19	14	33	68	14	82	99	103	202		535
	334725_335909_gene	93	97	190	15	13	28	56	54	110	68	11	79	66	62	128		535
	1296252_1297838_gene	63	56	119	8	5	13	60	66	126	52	19	71	98	108	206		535
	2475808_2477361_gene	53	50	103	9	7	16	118	117	235	36	8	44	57	81	138		536
	1666848_1667627_gene	80	73	153	6	15	21	70	65	135	34	8	42	87	99	186		537
	2884137_2885804_gene	82	56	138	59	31	90	5	3	8	20	6	26	122	153	275		537
	2233172_2233311_misc_RNA	43	31	74	75	53	128	11	8	19	146	32	178	64	75	139		538
	1961254_1961709_gene	55	85	140	12	12	24	89	70	159	80	18	98	57	60	117		538
	2737386_2739116_gene	217	169	386	6	6	12	33	27	60	16	1	17	29	35	64		539
	1669097_1669918_gene	69	56	125	23	21	44	41	38	79	55	10	65	117	111	228		541
	358532_359023_gene	50	78	128	22	20	42	30	38	68	37	5	42	110	151	261		541
	319832_320473_gene	82	88	170	10	9	19	50	38	88	34	17	51	105	111	216		544
	467113_467541_gene	46	53	99	15	10	25	103	96	199	34	9	43	85	94	179		545
	3086607_3087359_gene	69	78	147	22	24	46	48	63	111	46	12	58	84	99	183		545
	2348055_2348642_gene	65	63	128	15	10	25	31	45	76	44	12	56	125	138	263		548
	1185394_1187199_gene	73	53	126	34	24	58	18	19	37	49	7	56	135	136	271		548
	94825_95352_gene	54	68	122	39	32	71	7	5	12	80	15	95	128	121	249		549
	450758_451789_gene	29	33	62	38	40	78	16	15	31	43	10	53	150	175	325		549
	1179250_1180281_gene	51	44	95	20	21	41	80	91	171	44	7	51	106	86	192		550
	1355802_1356863_gene	90	102	192	10	12	22	32	45	77	25	7	32	117	111	228		551
	753083_753291_misc_RNA	61	45	106	91	65	156	9	12	21	103	26	129	73	66	139		551
	955610_956044_gene	35	37	72	54	54	108	9	4	13	50	8	58	149	152	301		552
	579103_579750_gene	89	73	162	23	27	50	9	19	28	50	6	56	105	151	256		552
	22497_23882_gene	80	78	158	25	9	34	47	38	85	75	9	84	98	93	191		552
	2518922_2519983_gene	76	64	140	10	7	17	82	48	130	25	5	30	107	128	235		552
	1322810_1323577_gene	57	55	112	21	24	45	32	25	57	65	12	77	133	128	261		552
	209967_210809_gene	26	21	47	17	8	25	144	122	266	60	7	67	72	77	149		554
	982720_983421_gene	103	82	185	3	5	8	92	89	181	58	16	74	52	54	106		554
	2533540_2537397_gene	74	84	158	17	12	29	51	36	87	41	8	49	119	113	232		555
	2230973_2231707_gene	129	146	275	18	14	32	26	21	47	35	9	44	85	72	157		555
	1056482_1058029_gene	67	45	112	13	14	27	39	41	80	52	12	64	124	148	272		555
	1141920_1142681_gene	61	70	131	8	11	19	80	59	139	129	22	151	46	69	115		555
	1003747_1004295_gene	126	122	248	9	8	17	51	39	90	60	8	68	65	67	132		555
	630316_630735_gene	80	67	147	26	17	43	30	32	62	64	17	81	111	112	223		556
	10226_11083_gene	54	48	102	43	41	84	27	15	42	53	15	68	128	132	260		556
	3233676_3234083_gene	82	81	163	10	8	18	27	39	66	36	7	43	119	148	267		557
	655706_657649_gene	39	62	101	5	6	11	134	113	247	37	3	40	72	86	158		557
	2542341_2545283_gene	80	85	165	8	7	15	146	123	269	43	10	53	23	32	55		557
	1159281_1159739_gene	142	122	264	10	10	20	37	36	73	33	6	39	82	79	161		557
	1362988_1364187_gene	41	43	84	11	7	18	98	94	192	51	15	66	100	97	197		557
	3358125_3358910_gene	56	65	121	5	5	10	81	78	159	124	27	151	63	54	117		558
	1174611_1175966_gene	112	109	221	9	9	18	82	48	130	47	17	64	66	59	125		558
	2625912_2627033_gene	43	47	90	3	4	7	115	129	244	100	30	130	39	48	87		558
	181180_182550_gene	128	124	252	24	16	40	9	7	16	27	6	33	106	112	218		559
	1819383_1819958_gene	92	90	182	14	9	23	95	60	155	58	13	71	57	73	130		561
	3330887_3332044_gene	81	56	137	18	13	31	29	16	45	39	12	51	140	158	298		562
	1772377_1774704_gene	87	94	181	16	12	28	54	58	112	38	10	48	89	104	193		562
	2152569_2153132_gene	59	64	123	4	4	8	111	142	253	80	23	103	39	39	78		565
	1475663_1476073_gene	29	29	58	2	1	3	253	218	471	11	3	14	9	10	19		565
	1675215_1675829_gene	91	90	181	8	6	14	56	37	93	45	16	61	95	121	216		565
	2898596_2899441_gene	69	86	155	31	24	55	49	56	105	72	15	87	85	78	163		565
	262101_262297_misc_RNA	38	34	72	35	34	69	22	24	46	19	2	21	185	173	358		566
	1340222_1341529_gene	72	70	142	27	25	52	12	8	20	79	17	96	116	140	256		566
	2097822_2099174_gene	104	91	195	22	26	48	29	33	62	68	17	85	81	97	178		568
	2849475_2851814_gene	83	76	159	15	10	25	53	51	104	33	11	44	107	130	237		569
	2521730_2523124_gene	80	75	155	10	10	20	80	71	151	44	14	58	86	99	185		569
	1821113_1821370_gene	114	123	237	12	17	29	69	65	134	37	8	45	57	67	124		569
	2146127_2146462_gene	60	50	110	47	48	95	23	13	36	62	11	73	119	136	255		569
	474811_476811_gene	88	81	169	22	18	40	21	24	45	16	8	24	130	162	292		570
	1421614_1423053_gene	98	80	178	24	15	39	22	19	41	31	5	36	138	140	278		572
	1294669_1296156_gene	86	91	177	14	20	34	47	27	74	41	9	50	97	140	237		572
	2512062_2513843_gene	114	92	206	16	19	35	52	41	93	45	5	50	96	93	189		573
	479719_480081_gene	62	50	112	14	28	42	100	92	192	68	19	87	65	77	142		575
	1485053_1485544_gene	79	82	161	16	13	29	21	14	35	39	9	48	149	153	302		575
	1701966_1702697_gene	95	123	218	16	10	26	28	35	63	49	14	63	97	108	205		575
	1506925_1507479_gene	59	55	114	15	15	30	45	55	100	31	3	34	133	165	298		576
	2696102_2697832_gene	96	77	173	20	12	32	56	40	96	86	24	110	80	86	166		577
	1255843_1256991_gene	58	80	138	41	38	79	8	13	21	62	16	78	150	111	261		577
	2391603_2394053_gene	70	74	144	12	12	24	56	39	95	85	18	103	96	116	212		578
	840701_841420_gene	125	123	248	30	20	50	18	15	33	40	14	54	89	104	193		578
	2278577_2279740_gene	133	125	258	19	16	35	11	14	25	34	5	39	110	111	221		578
	3076021_3076320_gene	58	50	108	16	11	27	69	59	128	26	2	28	133	154	287		578
	662451_663193_misc_RNA	49	68	117	32	40	72	9	11	20	97	24	121	109	140	249		579
	2847831_2848985_gene	77	53	130	30	25	55	28	17	45	45	8	53	152	144	296		579
	2755705_2756721_gene	97	101	198	9	5	14	67	72	139	55	14	69	70	90	160		580
	3019399_3020703_gene	98	85	183	30	30	60	41	37	78	34	10	44	104	111	215		580
	586474_586548_gene	129	93	222	19	12	31	38	33	71	46	8	54	90	114	204		582
	1407450_1407767_gene	72	86	158	14	9	23	55	53	108	50	13	63	105	125	230		582
	1064069_1065532_gene	46	48	94	68	55	123	11	9	20	97	21	118	101	126	227		582
	1872119_1872970_gene	62	64	126	80	51	131	15	19	34	167	30	197	39	58	97		585
	2210715_2211338_gene	91	76	167	21	15	36	31	29	60	65	18	83	112	128	240		586
	330852_332267_gene	43	43	86	3	7	10	137	130	267	60	13	73	78	73	151		587
	1049086_1050459_gene	51	72	123	13	20	33	41	58	99	65	11	76	94	162	256		587
	2287092_2287694_gene	74	65	139	10	19	29	73	60	133	53	8	61	99	129	228		590
	1815442_1816695_gene	84	90	174	24	18	42	25	31	56	37	8	45	140	133	273		590
	773426_774415_gene	103	92	195	15	11	26	40	53	93	35	9	44	105	128	233		591
	267234_269792_gene	48	60	108	29	31	60	33	40	73	51	7	58	133	164	297		596
	1622738_1624399_gene	97	64	161	26	27	53	19	21	40	52	9	61	146	135	281		596
	1793220_1794203_gene	84	73	157	30	22	52	19	28	47	50	15	65	141	134	275		596
	1818391_1819155_gene	134	127	261	15	21	36	22	29	51	74	18	92	71	85	156		596
	1683753_1684496_gene	138	135	273	7	10	17	38	28	66	46	18	64	86	92	178		598
	1063227_1063967_gene	59	64	123	11	11	22	91	129	220	19	2	21	92	121	213		599
	511961_512734_gene	53	48	101	3	7	10	107	105	212	66	6	72	107	97	204		599
	419232_419975_gene	117	107	224	23	11	34	50	43	93	67	19	86	76	86	162		599
	1229115_1230881_gene	83	84	167	4	10	14	47	37	84	20	5	25	155	154	309		599
	974982_976550_gene	103	106	209	44	41	85	16	9	25	51	11	62	101	118	219		600
	2212856_2213098_gene	42	60	102	9	9	18	81	75	156	26	4	30	146	149	295		601
	2694370_2694933_gene	79	89	168	26	16	42	23	31	54	48	10	58	125	154	279		601
	2432864_2432952_misc_RNA	47	62	109	77	64	141	9	10	19	112	28	140	94	99	193		602
	950095_950391_gene	62	65	127	9	7	16	158	133	291	63	10	73	54	42	96		603
	2939490_2939906_gene	63	70	133	11	19	30	59	65	124	55	13	68	110	140	250		605
	662203_662439_misc_RNA	100	87	187	62	65	127	1	3	4	94	22	116	74	97	171		605
	2398592_2399458_gene	49	66	115	13	10	23	34	39	73	35	15	50	166	179	345		606
	1411187_1411930_gene	62	62	124	38	14	52	35	28	63	176	47	223	64	80	144		606
	554771_555892_gene	45	32	77	39	31	70	20	19	39	43	12	55	161	205	366		607
	2921311_2921667_misc_RNA	98	88	186	31	24	55	16	23	39	31	6	37	140	152	292		609
	956168_956614_gene	67	56	123	14	19	33	79	69	148	85	23	108	89	111	200		612
	3131783_3132088_gene	81	94	175	69	54	123	7	13	20	107	31	138	70	86	156		612
	770320_770757_gene	57	66	123	26	32	58	38	32	70	64	14	78	128	155	283		612
	2094213_2095256_gene	84	88	172	32	22	54	19	16	35	49	13	62	124	166	290		613
	2751786_2752829_gene	73	67	140	19	11	30	99	114	213	56	16	72	72	86	158		613
	987677_987955_gene	73	53	126	13	16	29	156	142	298	32	10	42	58	61	119		614
	1416453_1416773_gene	131	108	239	13	10	23	108	114	222	31	8	39	40	51	91		614
	50444_51145_gene	104	86	190	30	27	57	24	25	49	94	19	113	101	105	206		615
	151325_151573_misc_RNA	177	180	357	23	20	43	12	11	23	79	21	100	44	48	92		615
	1356847_1358064_gene	75	90	165	21	13	34	71	95	166	44	13	57	97	97	194		616
	1246993_1248159_gene	40	38	78	3	5	8	216	203	419	25	9	34	32	46	78		617
	1313842_1314624_gene	52	40	92	52	46	98	15	18	33	69	17	86	141	168	309		618
	2767580_2768029_gene	107	91	198	26	18	44	38	44	82	32	5	37	121	140	261		622
	713454_715274_gene	71	84	155	11	35	46	70	62	132	49	13	62	117	112	229		624
	1454875_1455975_gene	131	119	250	22	14	36	43	38	81	35	7	42	108	108	216		625
	295512_296666_gene	72	65	137	19	14	33	71	66	137	93	23	116	94	109	203		626
	1205522_1206385_gene	239	239	478	4	2	6	37	35	72	46	9	55	10	6	16		627
	658819_660174_gene	44	38	82	18	13	31	80	61	141	97	23	120	124	129	253		627
	2146745_2149537_gene	179	154	333	20	17	37	21	14	35	10	4	14	84	124	208		627
	2793345_2794157_gene	53	44	97	13	16	29	29	27	56	31	6	37	171	237	408		627
	2442757_2443863_gene	72	69	141	9	7	16	72	99	171	106	38	144	71	85	156		628
	436108_436563_gene	54	46	100	62	77	139	7	10	17	106	10	116	106	151	257		629
	1183472_1185079_gene	76	66	142	21	19	40	36	25	61	72	17	89	133	165	298		630
	430808_431722_gene	88	92	180	25	18	43	31	29	60	46	12	58	133	162	295		636
	2751265_2751759_gene	118	143	261	13	12	25	61	67	128	62	21	83	53	86	139		636
	3244644_3245036_gene	88	95	183	26	16	42	57	48	105	60	16	76	112	119	231		637
	2764049_2766814_gene	62	56	118	48	53	101	20	13	33	38	13	51	153	181	334		637
	133670_133978_gene	84	69	153	40	24	64	99	89	188	66	15	81	76	76	152		638
	204074_204910_gene	159	171	330	6	13	19	52	46	98	19	4	23	85	86	171		641
	3345538_3346317_gene	33	39	72	12	17	29	81	83	164	274	71	345	10	21	31		641
	1620533_1621006_gene	53	59	112	12	12	24	156	138	294	62	16	78	58	75	133		641
	2162633_2163694_gene	70	62	132	15	8	23	79	70	149	44	14	58	135	145	280		642
	1147704_1148447_gene	115	126	241	16	7	23	100	105	205	73	18	91	35	47	82		642
	2246958_2247449_gene	65	71	136	22	26	48	53	70	123	39	15	54	139	142	281		642
	3346336_3347841_gene	54	46	100	14	4	18	111	97	208	182	47	229	39	49	88		643
	1938110_1939543_gene	106	96	202	21	27	48	49	52	101	42	11	53	104	136	240		644
	441321_443024_gene	44	49	93	36	22	58	24	25	49	33	13	46	199	200	399		645
	1159897_1160925_gene	61	78	139	28	25	53	57	35	92	84	23	107	109	145	254		645
	1418676_1420091_gene	44	53	97	14	10	24	81	78	159	44	8	52	153	160	313		645
	2242539_2243372_gene	94	75	169	27	25	52	18	23	41	59	10	69	140	174	314		645
	3048511_3049476_gene	64	81	145	26	34	60	52	42	94	57	8	65	122	159	281		645
	770649_771182_gene	86	83	169	29	37	66	44	40	84	67	19	86	118	124	242		647
	443204_444748_gene	166	140	306	16	9	25	70	72	142	68	20	88	45	42	87		648
	2075411_2076133_gene	57	45	102	54	44	98	13	6	19	62	11	73	169	188	357		649
	535517_536992_gene	100	101	201	32	36	68	37	28	65	38	9	47	135	135	270		651
	393342_393455_gene	104	87	191	41	43	84	8	13	21	94	31	125	108	124	232		653
	1819958_1820488_gene	109	141	250	17	23	40	58	55	113	95	15	110	79	62	141		654
	3388349_3390526_gene	105	106	211	21	21	42	44	40	84	97	27	124	109	85	194		655
	2223905_2224642_gene	56	49	105	50	24	74	52	60	112	183	38	221	73	71	144		656
	682215_683453_gene	83	86	169	25	18	43	39	34	73	44	18	62	151	158	309		656
	1750635_1751075_gene	97	112	209	31	15	46	77	64	141	46	13	59	88	114	202		657
	473739_474548_gene	71	91	162	45	30	75	46	30	76	33	12	45	134	165	299		657
	2967794_2968066_gene	79	95	174	6	6	12	93	99	192	67	16	83	87	109	196		657
	2869817_2871232_gene	70	74	144	14	24	38	39	36	75	38	15	53	148	200	348		658
	3282950_3283978_gene	102	87	189	59	65	124	19	11	30	63	16	79	106	130	236		658
	299524_300165_gene	77	68	145	25	19	44	65	62	127	35	10	45	135	163	298		659
	2633671_2634600_gene	50	61	111	53	45	98	9	3	12	51	17	68	163	207	370		659
	233907_235694_gene	113	100	213	17	11	28	83	66	149	76	14	90	93	87	180		660
	1327011_1328306_gene	70	47	117	46	35	81	53	57	110	104	22	126	110	116	226		660
	651687_652259_gene	75	100	175	35	31	66	12	13	25	44	11	55	159	181	340		661
	2397359_2397718_gene	65	62	127	17	13	30	88	74	162	83	15	98	96	148	244		661
	3079716_3080132_gene	73	75	148	18	15	33	42	27	69	33	11	44	177	190	367		661
	2072399_2072749_gene	68	65	133	35	26	61	64	52	116	66	19	85	121	146	267		662
	142872_143474_gene	102	99	201	36	36	72	15	17	32	49	5	54	127	176	303		662
	945420_946286_gene	18	24	42	0	1	1	299	251	550	37	16	53	7	10	17		663
	2919924_2921081_gene	45	56	101	16	16	32	31	38	69	26	6	32	192	238	430		664
	26016_26927_gene	51	61	112	30	32	62	20	19	39	32	6	38	183	234	417		668
	68797_69975_gene	92	88	180	17	14	31	17	10	27	62	18	80	163	187	350		668
	1395801_1396625_gene	82	107	189	26	27	53	51	43	94	40	8	48	124	161	285		669
	2237572_2238699_gene	106	117	223	27	18	45	26	21	47	43	3	46	138	172	310		671
	623078_624589_gene	120	145	265	17	16	33	27	27	54	61	14	75	114	130	244		671
	29788_30330_gene	77	86	163	8	8	16	108	110	218	79	25	104	87	83	170		671
	1594225_1594815_gene	103	110	213	27	25	52	46	46	92	61	13	74	110	131	241		672
	2242058_2242393_gene	105	100	205	77	46	123	3	3	6	118	35	153	79	107	186		673
	2175670_2176677_gene	100	98	198	22	15	37	88	69	157	26	8	34	126	121	247		673
	3056079_3056819_gene	97	94	191	18	19	37	92	123	215	62	11	73	76	82	158		674
	812529_812825_gene	101	122	223	11	8	19	85	70	155	33	10	43	112	123	235		675
	2567419_2567982_gene	81	76	157	22	14	36	47	47	94	51	10	61	164	164	328		676
	1813262_1815241_gene	48	52	100	12	2	14	133	162	295	81	23	104	80	84	164		677
	284008_284787_gene	63	71	134	22	11	33	54	42	96	54	12	66	156	193	349		678
	34187_34900_gene	68	60	128	28	26	54	32	41	73	41	11	52	187	184	371		678
	1827202_1828617_gene	140	124	264	36	45	81	18	18	36	77	18	95	101	103	204		680
	847412_848560_gene	90	95	185	20	28	48	38	37	75	35	13	48	137	187	324		680
	1675884_1676615_gene	107	84	191	25	18	43	52	54	106	70	13	83	123	135	258		681
	1366153_1366905_gene	167	172	339	34	17	51	5	4	9	23	7	30	119	136	255		684
	1244889_1246340_gene	101	102	203	15	18	33	80	58	138	53	14	67	108	135	243		684
	3265772_3266326_gene	86	86	172	28	21	49	40	35	75	44	9	53	167	169	336		685
	1811280_1812596_gene	24	31	55	8	6	14	269	188	457	67	20	87	39	34	73		686
	709427_710548_gene	105	89	194	20	16	36	77	65	142	56	15	71	111	133	244		687
	1642834_1645431_gene	76	80	156	41	32	73	44	37	81	51	7	58	152	168	320		688
	776719_777414_gene	97	75	172	16	16	32	62	83	145	24	14	38	155	147	302		689
	922896_923141_gene	54	52	106	42	45	87	60	56	116	99	17	116	121	146	267		692
	404182_404487_gene	205	216	421	3	2	5	26	38	64	24	7	31	81	90	171		692
	2928906_2929943_gene	120	126	246	27	18	45	73	62	135	82	19	101	91	75	166		693
	3359048_3359836_gene	114	110	224	20	13	33	81	81	162	52	14	66	97	114	211		696
	853550_854257_gene	91	120	211	20	12	32	12	15	27	21	11	32	181	214	395		697
	1591316_1591981_gene	86	82	168	37	22	59	29	36	65	77	15	92	157	159	316		700
	1859777_1860355_gene	72	89	161	22	10	32	92	85	177	52	15	67	128	137	265		702
	1532786_1533163_gene	32	31	63	6	1	7	239	198	437	131	38	169	16	12	28		704
	2933912_2935885_gene	67	66	133	69	45	114	15	6	21	70	15	85	171	180	351		704
	228667_228984_gene	126	119	245	17	15	32	30	28	58	120	25	145	118	107	225		705
	3302342_3303388_gene	44	46	90	35	15	50	111	106	217	168	43	211	61	76	137		705
	2130578_2131840_gene	64	71	135	48	25	73	12	24	36	41	10	51	185	226	411		706
	3396955_3397200_gene	66	72	138	43	47	90	14	12	26	59	21	80	168	205	373		707
	3090733_3091395_gene	72	63	135	25	19	44	89	56	145	50	19	69	154	160	314		707
	1286250_1288262_gene	70	77	147	4	2	6	188	163	351	124	23	147	36	22	58		709
	3194315_3200992_gene	77	72	149	7	14	21	121	127	248	61	11	72	105	115	220		710
	2831384_2834110_gene	112	68	180	10	12	22	106	101	207	61	14	75	104	124	228		712
	1581071_1582867_gene	132	116	248	51	39	90	40	37	77	76	21	97	96	104	200		712
	1627065_1628210_gene	74	58	132	64	54	118	18	24	42	117	31	148	126	147	273		713
	1618097_1618927_gene	101	95	196	24	19	43	53	41	94	53	15	68	147	165	312		713
	1694853_1695644_gene	101	92	193	28	23	51	32	21	53	63	14	77	154	189	343		717
	1302987_1304060_gene	70	83	153	76	69	145	16	16	32	61	22	83	134	171	305		718
	1683244_1683570_gene	92	77	169	56	48	104	6	6	12	123	23	146	113	175	288		719
	2274807_2275943_gene	106	118	224	12	16	28	36	46	82	62	19	81	143	162	305		720
	2525446_2525673_gene	97	94	191	35	23	58	27	23	50	147	32	179	118	124	242		720
	2768934_2769061_misc_RNA	76	75	151	56	55	111	14	23	37	35	6	41	174	206	380		720
	66075_67181_gene	86	88	174	31	32	63	17	20	37	71	12	83	160	203	363		720
	231609_232598_gene	54	62	116	7	10	17	138	127	265	84	19	103	100	119	219		720
	650436_651527_gene	71	61	132	58	46	104	22	17	39	98	34	132	136	178	314		721
	2204165_2205730_gene	97	81	178	21	25	46	45	40	85	19	5	24	156	232	388		721
	983992_984549_gene	36	33	69	19	27	46	119	117	236	200	45	245	57	70	127		723
	1107779_1108663_gene	126	105	231	26	23	49	42	43	85	52	19	71	123	165	288		724
	270686_272278_gene	58	66	124	6	6	12	196	152	348	55	10	65	68	108	176		725
	1146245_1147717_gene	150	168	318	19	11	30	61	60	121	95	24	119	64	73	137		725
	2257496_2257777_gene	59	72	131	58	31	89	101	72	173	71	15	86	131	116	247		726
	599136_599534_gene	136	130	266	25	19	44	64	52	116	70	18	88	102	111	213		727
	1713954_1714589_gene	95	95	190	32	22	54	20	16	36	48	17	65	180	203	383		728
	2455547_2456326_gene	113	122	235	7	11	18	36	33	69	41	14	55	153	198	351		728
	2139383_2140804_gene	81	88	169	37	30	67	22	15	37	47	9	56	168	232	400		729
	56651_57964_gene	102	78	180	29	19	48	55	58	113	79	16	95	149	144	293		729
	2067054_2067491_gene	106	106	212	20	23	43	48	42	90	46	10	56	167	162	329		730
	1511214_1511987_gene	85	95	180	19	15	34	54	53	107	30	14	44	183	182	365		730
	1997556_1997966_gene	126	109	235	2	1	3	157	168	325	58	17	75	41	52	93		731
	2143532_2144203_gene	84	80	164	54	55	109	29	31	60	114	32	146	122	134	256		735
	2815381_2816313_gene	173	172	345	15	7	22	52	69	121	21	6	27	104	116	220		735
	2775242_2776174_gene	84	117	201	22	33	55	35	35	70	59	23	82	152	175	327		735
	314892_315944_gene	55	65	120	8	13	21	142	128	270	87	20	107	97	121	218		736
	245097_246512_gene	85	77	162	35	33	68	44	39	83	71	22	93	153	178	331		737
	2110192_2110575_gene	85	99	184	5	8	13	159	131	290	45	13	58	75	117	192		737
	1036708_1040169_gene	80	75	155	70	58	128	19	22	41	80	16	96	144	174	318		738
	3289174_3290436_gene	81	77	158	10	8	18	100	96	196	53	13	66	143	158	301		739
	631254_633014_gene	114	130	244	19	13	32	103	104	207	77	22	99	61	97	158		740
	2705662_2706054_gene	127	114	241	4	3	7	211	211	422	21	8	29	14	28	42		741
	744637_744929_misc_RNA	97	82	179	88	64	152	5	11	16	123	28	151	110	134	244		742
	2826352_2827047_gene	95	113	208	55	50	105	14	10	24	73	15	88	154	166	320		745
	296785_298029_gene	91	52	143	39	36	75	13	15	28	105	22	127	174	199	373		746
	255881_256732_gene	124	104	228	24	18	42	42	36	78	49	12	61	157	180	337		746
	3325915_3326751_gene	87	92	179	35	24	59	12	16	28	29	6	35	200	246	446		747
	917120_917689_gene	93	88	181	22	19	41	86	76	162	31	5	36	154	174	328		748
	2259750_2260763_gene	106	102	208	35	31	66	34	35	69	54	14	68	161	176	337		748
	732710_733651_gene	88	101	189	15	9	24	74	67	141	61	17	78	150	166	316		748
	2899489_2900097_gene	130	137	267	26	33	59	23	18	41	57	17	74	132	176	308		749
	1507923_1509122_gene	114	81	195	26	30	56	33	26	59	83	15	98	153	188	341		749
	2506190_2507689_gene	132	140	272	32	23	55	37	37	74	67	17	84	108	157	265		750
	1898621_1899916_gene	74	82	156	31	18	49	53	55	108	64	12	76	174	187	361		750
	467559_468911_gene	98	86	184	26	14	40	44	48	92	65	13	78	168	189	357		751
	33175_34170_gene	107	95	202	36	30	66	71	74	145	81	17	98	107	134	241		752
	1283991_1285145_gene	109	87	196	38	48	86	23	37	60	102	28	130	146	134	280		752
	410410_410682_gene	95	92	187	39	28	67	30	29	59	51	12	63	183	194	377		753
	2309882_2311333_gene	99	86	185	35	18	53	23	25	48	24	9	33	208	228	436		755
	1775391_1776644_gene	110	85	195	16	24	40	81	77	158	55	5	60	144	162	306		759
	3109134_3110618_gene	95	91	186	8	11	19	105	118	223	105	24	129	96	107	203		760
	3366946_3368475_gene	59	52	111	22	31	53	63	53	116	29	15	44	209	228	437		761
	2872433_2872816_gene	124	105	229	27	26	53	22	26	48	49	13	62	171	199	370		762
	3383398_3383997_gene	133	91	224	38	35	73	42	37	79	95	17	112	133	142	275		763
	984836_985606_gene	135	132	267	26	32	58	28	16	44	75	8	83	137	176	313		765
	2200794_2203760_gene	208	196	404	13	10	23	31	47	78	20	9	29	105	127	232		766
	365325_365400_gene	132	131	263	30	29	59	22	22	44	48	10	58	155	187	342		766
	1852351_1853235_gene	80	97	177	16	11	27	117	132	249	110	17	127	76	110	186		766
	1154508_1156028_gene	89	92	181	20	27	47	48	54	102	88	22	110	156	172	328		768
	90308_91633_gene	49	67	116	15	14	29	124	106	230	36	5	41	169	185	354		770
	858280_859017_gene	156	173	329	32	21	53	37	28	65	47	18	65	126	132	258		770
	2251018_2251884_gene	62	76	138	100	73	173	44	38	82	166	40	206	84	89	173		772
	1231463_1232233_gene	39	35	74	48	29	77	29	36	65	45	6	51	219	287	506		773
	3179864_3180727_gene	295	271	566	13	16	29	16	12	28	40	10	50	46	55	101		774
	1094785_1096029_gene	95	100	195	23	17	40	64	63	127	96	26	122	143	147	290		774
	3214880_3216079_gene	102	105	207	35	32	67	59	51	110	53	12	65	154	171	325		774
	1893413_1894105_gene	91	96	187	28	16	44	28	26	54	72	21	93	191	206	397		775
	288008_289402_gene	36	41	77	16	10	26	190	151	341	174	42	216	48	67	115		775
	143588_146896_gene	54	81	135	47	46	93	30	36	66	48	15	63	197	222	419		776
	1910570_1910980_gene	217	160	377	7	5	12	92	91	183	21	2	23	86	97	183		778
	933968_934759_gene	145	115	260	46	32	78	18	13	31	76	16	92	136	181	317		778
	1604506_1605762_gene	101	129	230	18	7	25	131	81	212	138	35	173	68	72	140		780
	1797226_1798140_gene	91	94	185	51	32	83	61	66	127	70	20	90	128	170	298		783
	1470711_1471676_gene	78	68	146	47	38	85	54	33	87	71	17	88	166	215	381		787
	1336859_1337443_gene	95	110	205	36	27	63	46	51	97	80	16	96	145	182	327		788
	718789_719871_gene	38	31	69	9	7	16	217	205	422	82	17	99	85	97	182		788
	1919230_1919655_gene	152	117	269	37	32	69	88	88	176	46	9	55	98	121	219		788
	238638_241697_gene	90	89	179	48	24	72	42	47	89	54	10	64	187	198	385		789
	1410027_1410410_gene	84	89	173	35	30	65	29	31	60	88	16	104	171	217	388		790
	711681_713120_gene	113	88	201	19	16	35	104	95	199	91	19	110	128	118	246		791
	1355444_1355695_misc_RNA	73	60	133	21	13	34	12	19	31	63	8	71	249	273	522		791
	2771823_2773103_gene	203	201	404	7	11	18	114	94	208	80	14	94	33	35	68		792
	3037576_3038031_gene	216	282	498	3	6	9	43	36	79	21	6	27	87	95	182		795
	1901787_1902830_gene	142	109	251	18	25	43	68	69	137	61	14	75	145	147	292		798
	534313_535428_gene	59	71	130	33	33	66	114	127	241	82	18	100	144	119	263		800
	871761_872147_gene	65	72	137	22	31	53	171	146	317	83	15	98	88	108	196		801
	2794324_2795226_gene	55	80	135	13	12	25	44	54	98	47	4	51	201	292	493		802
	114931_116001_gene	82	77	159	82	67	149	19	12	31	86	22	108	181	174	355		802
	1517292_1518446_gene	79	81	160	34	22	56	123	120	243	54	10	64	129	153	282		805
	545216_546070_gene	83	85	168	34	29	63	19	20	39	50	18	68	217	250	467		805
	2447235_2451596_gene	97	114	211	30	27	57	55	52	107	39	10	49	161	220	381		805
	2731994_2732788_gene	138	128	266	73	50	123	23	23	46	131	18	149	103	118	221		805
	2878610_2880019_gene	107	140	247	14	11	25	156	154	310	26	8	34	76	114	190		806
	875315_876685_gene	89	88	177	51	40	91	44	51	95	65	19	84	152	207	359		806
	2172886_2173869_gene	71	63	134	20	13	33	76	67	143	79	16	95	199	204	403		808
	3242470_3244647_gene	145	129	274	46	40	86	34	29	63	104	25	129	124	132	256		808
	1466869_1468038_gene	167	180	347	42	43	85	11	10	21	167	25	192	92	72	164		809
	1336110_1336898_gene	75	73	148	34	27	61	55	61	116	58	14	72	199	213	412		809
	2005655_2006851_gene	164	167	331	23	25	48	26	38	64	42	9	51	133	187	320		814
	1015763_1016128_gene	124	114	238	28	31	59	39	39	78	82	20	102	154	184	338		815
	3326744_3327592_gene	91	78	169	32	22	54	8	7	15	36	12	48	246	283	529		815
	2099864_2100958_gene	94	94	188	21	17	38	69	78	147	47	17	64	178	200	378		815
	2692257_2694044_gene	42	50	92	9	5	14	201	203	404	108	24	132	90	84	174		816
	298358_298636_gene	66	81	147	40	16	56	19	19	38	52	11	63	248	265	513		817
	552926_553330_gene	84	75	159	58	46	104	24	28	52	105	20	125	159	218	377		817
	77642_78820_gene	121	99	220	52	52	104	82	72	154	55	14	69	117	155	272		819
	626235_626420_gene	69	66	135	76	65	141	37	32	69	103	37	140	153	182	335		820
	2399558_2401387_gene	94	92	186	71	41	112	34	40	74	124	20	144	144	160	304		820
	1125147_1125521_gene	204	200	404	10	1	11	83	62	145	71	19	90	72	100	172		822
	3335790_3337616_gene	98	93	191	75	45	120	10	16	26	87	22	109	175	202	377		823
	1874936_1876333_gene	72	86	158	26	13	39	92	117	209	47	14	61	180	176	356		823
	2058256_2058987_gene	94	99	193	33	26	59	31	42	73	53	16	69	204	226	430		824
	2153489_2154415_gene	105	81	186	31	23	54	109	90	199	98	20	118	121	147	268		825
	1613697_1614701_gene	63	74	137	33	18	51	44	34	78	63	10	73	240	248	488		827
	1055637_1056521_gene	81	92	173	18	21	39	67	57	124	64	16	80	191	221	412		828
	1305872_1306339_gene	158	140	298	53	59	112	20	22	42	62	11	73	140	163	303		828
	304581_306524_gene	102	101	203	58	43	101	74	67	141	168	35	203	82	99	181		829
	1727278_1729422_gene	104	117	221	33	26	59	75	77	152	94	17	111	125	162	287		830
	2743785_2744996_gene	82	66	148	12	9	21	177	169	346	120	34	154	65	96	161		830
	2940021_2940887_gene	117	103	220	26	11	37	154	128	282	111	28	139	68	85	153		831
	3397512_3397646_gene	114	107	221	98	60	158	9	11	20	87	15	102	166	165	331		832
	127189_130458_gene	71	81	152	47	47	94	50	62	112	30	3	33	202	240	442		833
	2503751_2504842_gene	166	191	357	21	16	37	70	78	148	33	12	45	127	120	247		834
	962856_964007_gene	96	48	144	57	50	107	51	66	117	125	28	153	143	171	314		835
	3115727_3116068_gene	86	77	163	40	35	75	27	24	51	58	20	78	214	254	468		835
	2565057_2566175_gene	119	103	222	20	27	47	119	103	222	101	25	126	101	118	219		836
	1557870_1558232_gene	127	126	253	35	38	73	58	57	115	75	25	100	127	168	295		836
	2114993_2116798_gene	114	79	193	35	30	65	34	30	64	76	15	91	178	247	425		838
	2885982_2887349_gene	88	69	157	81	63	144	8	8	16	98	14	112	206	204	410		839
	1149688_1150098_gene	95	103	198	16	19	35	147	131	278	113	23	136	81	112	193		840
	1896894_1898534_gene	198	176	374	28	27	55	93	73	166	25	5	30	98	120	218		843
	2020922_2021917_gene	132	142	274	30	34	64	50	34	84	65	12	77	158	186	344		843
	955300_955387_gene	95	74	169	11	5	16	167	173	340	55	10	65	125	128	253		843
	2642686_2643951_gene	83	96	179	38	31	69	28	13	41	64	14	78	238	239	477		844
	878744_880447_gene	121	123	244	7	8	15	217	223	440	62	14	76	41	37	78		853
	1791933_1792964_gene	111	99	210	28	26	54	37	38	75	75	21	96	166	252	418		853
	638607_639056_gene	82	65	147	48	52	100	51	48	99	82	17	99	197	211	408		853
	111756_112208_gene	46	53	99	97	83	180	13	8	21	98	26	124	200	230	430		854
	1474594_1475340_gene	43	34	77	3	6	9	268	258	526	109	20	129	43	70	113		854
	1546357_1547169_gene	101	87	188	60	50	110	42	43	85	113	26	139	148	184	332		854
	850246_851319_gene	88	56	144	96	75	171	12	8	20	120	34	154	161	205	366		855
	58028_58894_gene	108	87	195	18	21	39	79	81	160	132	26	158	134	169	303		855
	2574377_2575027_gene	90	92	182	87	76	163	44	34	78	91	32	123	143	167	310		856
	958332_959612_gene	96	85	181	32	34	66	24	17	41	47	10	57	263	250	513		858
	431953_433011_gene	297	272	569	10	7	17	86	68	154	28	3	31	28	61	89		860
	1854141_1856366_gene	58	47	105	7	15	22	129	131	260	166	39	205	128	141	269		861
	229092_230123_gene	124	108	232	18	18	36	34	26	60	54	18	72	213	248	461		861
	1353613_1355409_gene	137	141	278	22	19	41	50	55	105	54	20	74	165	201	366		864
	796792_797274_gene	79	87	166	29	24	53	68	89	157	74	15	89	189	211	400		865
	2348647_2350782_gene	117	93	210	27	21	48	91	89	180	95	22	117	139	171	310		865
	616597_616782_gene	97	107	204	29	30	59	52	26	78	66	16	82	220	223	443		866
	1004273_1004908_gene	128	139	267	25	21	46	110	88	198	79	33	112	107	138	245		868
	2622446_2623807_gene	60	81	141	61	58	119	17	12	29	44	6	50	246	284	530		869
	1904337_1905683_gene	159	159	318	49	31	80	87	72	159	95	22	117	98	99	197		871
	332290_333456_gene	31	24	55	5	6	11	235	194	429	166	34	200	91	86	177		872
	2820928_2823756_gene	189	194	383	33	21	54	45	59	104	28	7	35	140	156	296		872
	1285388_1286185_gene	131	129	260	26	34	60	25	17	42	41	12	53	205	253	458		873
	424005_424571_gene	89	92	181	16	5	21	150	154	304	48	7	55	144	168	312		873
	369457_369510_misc_RNA	67	63	130	21	13	34	20	26	46	18	3	21	304	344	648		879
	3225308_3225523_gene	47	55	102	129	88	217	17	19	36	116	32	148	179	198	377		880
	544546_545262_gene	100	105	205	38	46	84	12	8	20	71	14	85	218	271	489		883
	1809954_1811267_gene	123	140	263	55	54	109	12	20	32	151	34	185	141	154	295		884
	1330454_1330562_misc_RNA	134	126	260	13	13	26	83	78	161	30	4	34	199	205	404		885
	2525683_2527050_gene	120	141	261	39	28	67	12	10	22	100	18	118	198	219	417		885
	2862083_2862349_misc_RNA	110	98	208	19	15	34	69	58	127	65	18	83	208	225	433		885
	407663_408496_gene	126	103	229	29	25	54	89	76	165	89	19	108	153	177	330		886
	639466_640419_gene	86	83	169	50	41	91	24	17	41	58	21	79	253	255	508		888
	1736886_1737743_gene	97	96	193	34	26	60	76	74	150	66	7	73	201	216	417		893
	3246289_3247059_gene	135	110	245	53	26	79	43	49	92	164	38	202	137	139	276		894
	3338797_3338909_misc_RNA	115	118	233	97	100	197	13	16	29	128	39	167	135	134	269		895
	841736_843253_gene	125	145	270	28	17	45	76	87	163	75	10	85	143	189	332		895
	1317730_1318731_gene	109	116	225	27	35	62	52	47	99	125	25	150	168	191	359		895
	838606_839643_gene	173	146	319	41	27	68	33	23	56	39	7	46	189	217	406		895
	3093233_3094210_gene	118	113	231	23	21	44	75	73	148	74	10	84	177	212	389		896
	1543319_1544317_gene	140	129	269	20	23	43	11	5	16	61	18	79	225	265	490		897
	1507397_1507819_gene	91	100	191	46	32	78	66	72	138	74	12	86	196	209	405		898
	293971_294924_gene	142	127	269	14	21	35	59	61	120	71	21	92	175	207	382		898
	2313772_2314146_gene	158	140	298	9	4	13	119	102	221	16	5	21	159	186	345		898
	1893014_1893385_gene	162	156	318	31	25	56	49	37	86	57	18	75	156	207	363		898
	1061065_1062786_gene	87	91	178	13	17	30	125	116	241	28	7	35	190	226	416		900
	3023919_3025646_gene	157	106	263	34	21	55	44	33	77	92	17	109	182	214	396		900
	2311404_2312924_gene	149	111	260	45	45	90	43	33	76	77	28	105	169	201	370		901
	811164_812417_gene	92	112	204	13	16	29	65	56	121	85	12	97	215	236	451		902
	7271_8317_gene	96	87	183	59	34	93	33	33	66	53	16	69	234	257	491		902
	1425122_1425478_misc_RNA	40	41	81	2	4	6	270	257	527	172	38	210	41	38	79		903
	644249_645562_gene	84	90	174	21	17	38	98	85	183	70	19	89	208	213	421		905
	2211372_2211791_gene	119	98	217	28	30	58	39	53	92	101	30	131	200	208	408		906
	3046318_3047175_gene	156	185	341	30	31	61	53	37	90	64	10	74	169	171	340		906
	1770226_1770903_gene	99	80	179	29	28	57	53	53	106	108	24	132	198	234	432		906
	2566215_2567105_gene	148	109	257	34	22	56	108	112	220	97	18	115	123	136	259		907
	1601435_1602322_gene	102	110	212	50	50	100	19	22	41	93	25	118	203	233	436		907
	95581_97527_gene	79	92	171	75	64	139	27	27	54	52	19	71	219	255	474		909
	3088490_3089677_gene	93	89	182	32	23	55	196	152	348	70	15	85	118	121	239		909
	2345033_2345737_gene	200	187	387	29	22	51	57	58	115	58	18	76	135	150	285		914
	2524093_2525103_gene	155	136	291	33	16	49	82	100	182	105	14	119	127	146	273		914
	1562840_1563721_gene	75	79	154	27	25	52	98	87	185	83	25	108	197	219	416		915
	2104879_2105232_gene	53	43	96	7	2	9	242	231	473	220	44	264	29	48	77		919
	3272724_3273350_gene	120	123	243	43	53	96	31	41	72	123	36	159	168	182	350		920
	876838_878541_gene	81	80	161	58	46	104	29	28	57	96	15	111	228	261	489		922
	497705_500626_gene	91	75	166	85	72	157	64	58	122	208	35	243	110	125	235		923
	3085645_3086610_gene	132	122	254	38	37	75	57	71	128	80	17	97	176	193	369		923
	201209_201934_gene	94	100	194	82	64	146	33	43	76	73	23	96	176	236	412		924
	1835379_1836422_gene	94	93	187	9	6	15	206	179	385	85	21	106	98	134	232		925
	613387_613923_gene	137	112	249	40	48	88	65	61	126	97	18	115	171	177	348		926
	2641848_2642681_gene	64	64	128	59	43	102	18	29	47	112	22	134	258	259	517		928
	2970147_2971217_gene	116	111	227	26	40	66	36	41	77	135	27	162	195	201	396		928
	716146_716610_gene	68	77	145	6	8	14	260	235	495	84	14	98	82	94	176		928
	1521417_1523297_gene	183	156	339	76	53	129	7	13	20	82	27	109	165	167	332		929
	3308597_3309298_gene	131	124	255	46	46	92	46	59	105	89	23	112	159	207	366		930
	3008661_3009527_gene	106	106	212	47	30	77	37	37	74	83	23	106	204	258	462		931
	1195240_1196376_gene	111	115	226	22	6	28	216	185	401	95	25	120	66	90	156		931
	1016427_1016990_gene	146	132	278	34	21	55	78	57	135	136	28	164	129	170	299		931
	2233519_2234397_gene	20	36	56	0	1	1	312	278	590	157	44	201	44	39	83		931
	3202105_3203970_gene	68	79	147	9	8	17	180	190	370	138	47	185	105	108	213		932
	2140935_2142365_gene	78	74	152	37	24	61	87	83	170	60	12	72	251	226	477		932
	3309279_3310424_gene	102	91	193	41	43	84	48	58	106	80	21	101	204	245	449		933
	81213_82814_gene	54	39	93	12	9	21	241	244	485	146	29	175	71	89	160		934
	2664144_2665889_gene	108	134	242	68	46	114	17	15	32	77	17	94	209	244	453		935
	45714_45904_misc_RNA	163	142	305	20	11	31	60	57	117	114	32	146	166	172	338		937
	797274_798326_gene	88	82	170	30	30	60	100	99	199	159	42	201	138	172	310		940
	3091385_3091948_gene	98	93	191	34	28	62	121	86	207	56	21	77	192	214	406		943
	3397167_3397355_gene	94	97	191	57	61	118	28	28	56	59	25	84	218	278	496		945
	954486_955127_gene	116	115	231	39	34	73	41	41	82	85	17	102	215	242	457		945
	138448_140187_gene	127	89	216	25	39	64	89	71	160	87	31	118	181	207	388		946
	615519_616499_gene	147	154	301	30	38	68	68	69	137	80	19	99	171	172	343		948
	872251_873594_gene	74	67	141	87	63	150	51	42	93	126	38	164	192	211	403		951
	3307407_3308654_gene	146	117	263	29	33	62	40	34	74	89	17	106	199	247	446		951
	58945_59217_misc_RNA	60	60	120	5	6	11	302	264	566	111	23	134	58	62	120		951
	1168784_1169911_gene	112	121	233	22	27	49	26	21	47	75	10	85	242	296	538		952
	3056816_3058030_gene	130	111	241	31	22	53	80	82	162	124	36	160	161	179	340		956
	900831_902081_gene	93	104	197	29	27	56	42	39	81	56	18	74	235	314	549		957
	27119_27598_gene	99	130	229	46	39	85	46	49	95	74	20	94	235	219	454		957
	1469996_1470721_gene	83	89	172	48	41	89	35	45	80	62	18	80	264	274	538		959
	177533_177826_gene	224	259	483	23	25	48	41	48	89	53	11	64	123	152	275		959
	1885806_1887116_gene	129	114	243	56	52	108	36	29	65	68	13	81	219	244	463		960
	646869_647192_gene	115	112	227	32	29	61	45	50	95	50	15	65	234	282	516		964
	2087055_2088281_gene	159	123	282	27	20	47	125	90	215	89	21	110	139	172	311		965
	1829032_1830150_gene	136	136	272	26	26	52	91	77	168	116	28	144	156	175	331		967
	452673_453314_gene	129	142	271	34	27	61	85	67	152	50	7	57	194	232	426		967
	1259593_1261902_gene	85	98	183	10	10	20	170	160	330	175	39	214	101	119	220		967
	3038144_3038599_gene	122	130	252	19	18	37	73	74	147	87	33	120	169	243	412		968
	1297835_1299163_gene	77	104	181	18	16	34	195	205	400	98	21	119	110	124	234		968
	403227_404072_gene	144	128	272	47	36	83	39	31	70	113	24	137	186	221	407		969
	2053752_2054852_gene	67	71	138	92	64	156	38	39	77	192	36	228	169	203	372		971
	1949425_1950381_gene	173	135	308	53	47	100	46	34	80	95	27	122	166	199	365		975
	2704832_2705311_gene	91	88	179	6	10	16	208	198	406	70	27	97	144	135	279		977
	24111_25793_gene	89	91	180	38	27	65	38	49	87	64	19	83	265	298	563		978
	928676_929269_gene	126	103	229	36	44	80	46	39	85	130	34	164	184	236	420		978
	3113646_3114911_gene	148	131	279	69	71	140	35	41	76	127	45	172	139	174	313		980
	916630_917139_gene	103	105	208	16	23	39	152	130	282	57	6	63	193	195	388		980
	704468_705658_gene	130	117	247	18	15	33	67	61	128	73	20	93	236	243	479		980
	204907_206349_gene	257	238	495	14	15	29	60	53	113	53	12	65	142	139	281		983
	3247077_3247883_gene	132	130	262	51	28	79	40	42	82	240	61	301	118	142	260		984
	1946120_1946503_gene	102	105	207	17	14	31	86	84	170	35	8	43	254	280	534		985
	109946_111139_gene	95	87	182	43	52	95	30	24	54	42	10	52	286	318	604		987
	89551_90318_gene	46	39	85	68	56	124	22	24	46	60	14	74	321	338	659		988
	2102459_2103676_gene	290	265	555	26	22	48	77	66	143	68	21	89	66	87	153		988
	195663_196118_gene	208	224	432	14	6	20	128	115	243	74	21	95	87	117	204		994
	35024_37981_gene	79	73	152	28	32	60	140	122	262	114	24	138	179	204	383		995
	2706182_2707252_gene	74	75	149	17	10	27	229	200	429	141	33	174	97	119	216		995
	1678273_1678854_gene	95	93	188	8	12	20	177	189	366	82	21	103	152	167	319		996
	2475025_2475591_gene	30	26	56	0	1	1	486	411	897	3	1	4	19	20	39		997
	1929662_1930432_gene	112	122	234	21	19	40	91	92	183	91	22	113	195	232	427		997
	2590658_2590885_gene	85	65	150	100	100	200	12	14	26	85	25	110	242	272	514		1000
	30477_30902_gene	213	196	409	26	25	51	134	113	247	48	9	57	114	123	237		1001
	1288486_1289007_gene	129	113	242	53	45	98	25	30	55	96	32	128	212	269	481		1004
	801369_802979_gene	101	85	186	28	22	50	124	83	207	87	16	103	227	233	460		1006
	2055478_2056269_gene	172	183	355	47	47	94	90	87	177	81	15	96	130	155	285		1007
	737789_739579_gene	101	115	216	52	49	101	83	75	158	127	26	153	166	214	380		1008
	1321346_1322101_gene	125	132	257	28	16	44	96	89	185	72	23	95	196	232	428		1009
	2791964_2792995_gene	146	137	283	43	64	107	20	17	37	103	24	127	202	253	455		1009
	558434_559264_gene	142	152	294	15	17	32	136	113	249	71	22	93	152	190	342		1010
	1555198_1555968_gene	142	141	283	27	38	65	71	60	131	106	23	129	190	213	403		1011
	3158378_3159784_gene	213	186	399	11	11	22	114	128	242	32	11	43	144	163	307		1013
	1429644_1430942_gene	158	135	293	24	15	39	100	93	193	109	29	138	177	174	351		1014
	1531824_1532579_gene	227	228	455	38	31	69	21	26	47	95	20	115	159	171	330		1016
	2039223_2040389_gene	142	124	266	39	27	66	63	58	121	71	21	92	216	256	472		1017
	1820492_1821091_gene	174	159	333	46	30	76	166	147	313	97	25	122	79	94	173		1017
	837477_838595_gene	155	144	299	52	45	97	61	40	101	87	20	107	197	217	414		1018
	2160726_2162618_gene	138	151	289	10	13	23	120	107	227	79	30	109	164	207	371		1019
	335977_336753_gene	241	208	449	31	19	50	86	71	157	92	15	107	120	137	257		1020
	1242309_1242773_gene	195	214	409	47	41	88	76	67	143	106	21	127	101	152	253		1020
	1262032_1263513_gene	104	94	198	25	27	52	87	77	164	106	33	139	231	237	468		1021
	1857651_1859780_gene	130	130	260	19	28	47	142	139	281	62	13	75	186	173	359		1022
	2091350_2092132_gene	119	114	233	53	48	101	57	76	133	95	30	125	189	243	432		1024
	230239_231609_gene	91	90	181	18	15	33	157	152	309	153	40	193	146	165	311		1027
	2782650_2783435_gene	181	213	394	56	30	86	58	58	116	138	28	166	127	140	267		1029
	539776_540945_gene	190	170	360	23	31	54	80	79	159	73	22	95	160	205	365		1033
	300982_302328_gene	145	140	285	42	29	71	42	43	85	89	20	109	261	222	483		1033
	339639_340322_gene	195	166	361	21	21	42	51	54	105	35	16	51	210	265	475		1034
	1911490_1911948_gene	188	204	392	30	32	62	27	29	56	30	9	39	213	273	486		1035
	2783453_2784298_gene	174	160	334	52	35	87	65	63	128	141	24	165	155	169	324		1038
	968328_969092_gene	133	107	240	53	51	104	93	84	177	96	23	119	179	219	398		1038
	3369048_3370397_gene	120	98	218	44	55	99	73	74	147	203	35	238	173	164	337		1039
	3060042_3060257_gene	105	108	213	45	20	65	96	104	200	106	14	120	225	217	442		1040
	1109618_1112146_gene	92	82	174	36	34	70	150	100	250	130	25	155	213	178	391		1040
	2167602_2169122_gene	186	192	378	18	12	30	117	142	259	93	25	118	114	142	256		1041
	2708876_2709448_gene	108	105	213	58	52	110	12	23	35	254	51	305	172	207	379		1042
	2598385_2601261_gene	113	119	232	86	59	145	62	48	110	84	19	103	212	241	453		1043
	2530946_2532784_gene	142	143	285	5	9	14	189	198	387	147	46	193	76	93	169		1048
	404662_407352_gene	136	162	298	7	11	18	291	250	541	41	8	49	61	81	142		1048
	311920_312618_gene	135	100	235	45	35	80	59	46	105	81	12	93	249	287	536		1049
	18331_19542_gene	161	149	310	34	28	62	140	136	276	164	36	200	96	107	203		1051
	680594_682168_gene	117	115	232	35	19	54	107	100	207	53	9	62	238	260	498		1053
	1410413_1411168_gene	159	148	307	48	40	88	33	33	66	98	15	113	228	252	480		1054
	1770905_1771384_gene	110	79	189	57	60	117	54	47	101	166	34	200	215	232	447		1054
	2479457_2479804_gene	105	101	206	15	16	31	213	206	419	108	27	135	122	142	264		1055
	3026515_3027459_gene	205	186	391	32	27	59	43	24	67	63	16	79	218	241	459		1055
	1691139_1691954_gene	139	133	272	25	14	39	90	106	196	73	20	93	231	225	456		1056
	2181810_2184092_gene	134	152	286	64	43	107	50	59	109	47	10	57	245	254	499		1058
	1334396_1334968_gene	26	31	57	11	7	18	311	275	586	181	47	228	64	105	169		1058
	2640340_2641203_gene	144	138	282	44	42	86	41	40	81	107	17	124	237	249	486		1059
	3054810_3055205_gene	92	107	199	58	46	104	50	52	102	88	22	110	254	292	546		1061
	1688628_1689866_gene	121	83	204	7	9	16	198	169	367	61	18	79	177	218	395		1061
	1832061_1833014_gene	177	192	369	28	20	48	76	60	136	80	16	96	197	216	413		1062
	2563654_2565060_gene	128	110	238	26	13	39	207	194	401	140	32	172	103	111	214		1064
	287203_287802_gene	120	123	243	28	22	50	115	100	215	122	23	145	183	228	411		1064
	179810_181150_gene	204	177	381	50	44	94	20	32	52	90	22	112	204	227	431		1070
	3333109_3334911_gene	128	120	248	56	49	105	16	26	42	85	21	106	283	287	570		1071
	2038420_2039226_gene	132	122	254	26	33	59	82	84	166	59	18	77	251	265	516		1072
	501696_503285_gene	128	117	245	63	53	116	77	74	151	113	10	123	216	226	442		1077
	639092_639463_gene	124	100	224	92	76	168	43	42	85	132	29	161	212	227	439		1077
	2250383_2251012_gene	104	109	213	99	70	169	123	94	217	129	32	161	153	165	318		1078
	693107_693706_gene	138	147	285	80	72	152	18	20	38	87	18	105	243	257	500		1080
	1975696_1976067_gene	209	194	403	15	24	39	113	92	205	60	17	77	169	187	356		1080
	696777_697568_gene	155	137	292	44	24	68	64	55	119	101	27	128	220	253	473		1080
	3314290_3315060_gene	89	101	190	59	48	107	46	43	89	110	26	136	261	298	559		1081
	477490_478539_gene	125	136	261	36	35	71	52	58	110	49	11	60	246	333	579		1081
	2519995_2521740_gene	93	103	196	23	23	46	170	194	364	72	30	102	168	205	373		1081
	1040246_1041508_gene	213	239	452	55	28	83	64	53	117	96	22	118	144	167	311		1081
	2366711_2366920_gene	52	53	105	48	39	87	19	25	44	110	25	135	346	366	712		1083
	2052959_2053375_gene	141	159	300	36	38	74	26	21	47	56	18	74	272	319	591		1086
	1415804_1416403_gene	168	161	329	58	53	111	83	61	144	115	27	142	170	192	362		1088
	3227502_3228890_gene	268	232	500	21	14	35	63	47	110	87	14	101	165	177	342		1088
	1121779_1123989_gene	213	175	388	46	33	79	88	100	188	177	42	219	99	116	215		1089
	2170297_2171151_gene	125	120	245	16	9	25	138	122	260	56	16	72	234	253	487		1089
	1988899_1989672_gene	67	57	124	8	7	15	273	250	523	177	50	227	102	99	201		1090
	520792_521955_gene	184	196	380	63	45	108	61	44	105	115	31	146	154	197	351		1090
	51460_52320_gene	208	226	434	22	18	40	49	57	106	105	26	131	166	216	382		1093
	3290460_3291329_gene	129	112	241	41	24	65	182	173	355	107	29	136	140	156	296		1093
	2723867_2724694_gene	162	184	346	56	49	105	18	13	31	47	12	59	262	293	555		1096
	1531442_1531873_gene	241	237	478	34	37	71	62	42	104	122	23	145	135	163	298		1096
	236492_238030_gene	172	145	317	42	28	70	56	47	103	120	34	154	208	245	453		1097
	1314772_1315716_gene	129	123	252	46	44	90	125	117	242	123	32	155	166	193	359		1098
	1158966_1159229_gene	164	198	362	16	24	40	107	101	208	77	16	93	190	205	395		1098
	1966636_1966950_gene	117	138	255	14	6	20	201	223	424	84	29	113	133	154	287		1099
	341341_341434_misc_RNA	42	34	76	56	52	108	180	177	357	303	69	372	90	98	188		1101
	1144897_1145286_gene	35	47	82	13	16	29	96	79	175	549	142	691	57	69	126		1103
	1501020_1502150_gene	94	110	204	34	47	81	114	111	225	199	51	250	172	172	344		1104
	938166_938897_gene	262	198	460	30	15	45	78	67	145	61	13	74	195	185	380		1104
	2034644_2035651_gene	153	130	283	50	35	85	108	101	209	130	24	154	165	208	373		1104
	169315_170649_gene	124	143	267	34	30	64	61	53	114	73	23	96	280	285	565		1106
	1710317_1711099_gene	135	121	256	63	41	104	27	29	56	81	23	104	288	302	590		1110
	895554_895889_gene	147	156	303	38	35	73	96	85	181	279	70	349	94	110	204		1110
	1544317_1544955_gene	142	142	284	50	34	84	29	29	58	73	24	97	292	298	590		1113
	723312_724625_gene	94	93	187	21	17	38	192	188	380	280	78	358	82	68	150		1113
	922225_922506_gene	92	107	199	25	21	46	156	133	289	124	30	154	186	240	426		1114
	1948527_1949312_gene	151	134	285	105	89	194	24	25	49	108	14	122	228	238	466		1116
	1031851_1032657_gene	228	187	415	31	24	55	127	103	230	123	27	150	107	165	272		1122
	1988121_1988942_gene	112	104	216	6	13	19	285	262	547	87	29	116	102	122	224		1122
	2900255_2901337_gene	182	178	360	34	30	64	38	28	66	88	24	112	229	292	521		1123
	2632916_2633299_gene	213	217	430	18	23	41	172	141	313	149	34	183	67	91	158		1125
	328627_330849_gene	74	52	126	12	12	24	308	252	560	161	38	199	96	121	217		1126
	586260_586448_gene	123	150	273	95	72	167	42	52	94	84	32	116	229	250	479		1129
	2431605_2432864_gene	184	213	397	57	36	93	24	16	40	54	11	65	255	279	534		1129
	2485291_2486850_gene	125	125	250	74	55	129	42	58	100	84	20	104	270	278	548		1131
	2451717_2454203_gene	353	334	687	4	3	7	113	90	203	48	8	56	84	94	178		1131
	2960933_2961613_gene	129	127	256	38	40	78	38	32	70	52	14	66	319	343	662		1132
	3337758_3338723_gene	127	128	255	94	75	169	17	21	38	123	37	160	243	269	512		1134
	3266369_3267070_gene	118	112	230	57	55	112	73	69	142	126	23	149	237	271	508		1141
	2090282_2090956_gene	195	185	380	83	59	142	60	49	109	151	32	183	158	171	329		1143
	3352158_3353057_gene	44	42	86	1	1	2	459	448	907	27	5	32	59	59	118		1145
	1740446_1741135_gene	160	187	347	45	41	86	94	79	173	92	16	108	207	224	431		1145
	1223381_1225732_gene	155	158	313	29	24	53	166	143	309	111	22	133	148	190	338		1146
	2101020_2101460_gene	155	142	297	32	27	59	109	123	232	96	36	132	197	230	427		1147
	1840733_1843051_gene	125	158	283	27	25	52	101	106	207	116	19	135	217	254	471		1148
	2090946_2091338_gene	207	229	436	74	58	132	49	55	104	141	40	181	145	150	295		1148
	2472187_2474049_gene	176	171	347	11	11	22	206	156	362	87	12	99	142	177	319		1149
	1850812_1852203_gene	145	136	281	10	9	19	292	282	574	132	43	175	43	57	100		1149
	3007840_3008502_gene	140	135	275	74	58	132	54	38	92	106	27	133	245	277	522		1154
	2921081_2921870_misc_RNA	80	73	153	115	73	188	66	44	110	285	49	334	152	217	369		1154
	260923_262029_gene	96	92	188	30	28	58	150	136	286	32	9	41	273	310	583		1156
	3006761_3007852_gene	173	158	331	47	45	92	60	68	128	104	28	132	210	263	473		1156
	2352960_2353739_gene	106	114	220	6	5	11	356	311	667	77	20	97	74	87	161		1156
	3025688_3026485_gene	146	165	311	26	26	52	144	153	297	162	39	201	139	157	296		1157
	2777324_2779267_gene	116	114	230	34	29	63	84	68	152	104	28	132	273	308	581		1158
	1479974_1480858_gene	148	154	302	83	69	152	30	34	64	223	50	273	183	185	368		1159
	2757333_2757743_gene	77	61	138	16	15	31	251	237	488	187	56	243	121	140	261		1161
	85025_85606_gene	162	152	314	89	68	157	27	18	45	148	32	180	213	252	465		1161
	2256868_2257482_gene	63	67	130	21	14	35	258	209	467	150	29	179	159	192	351		1162
	3116678_3117769_gene	141	157	298	58	36	94	100	71	171	121	31	152	210	240	450		1165
	727873_730614_gene	146	179	325	34	21	55	66	71	137	75	17	92	241	316	557		1166
	2169139_2170266_gene	114	156	270	16	24	40	222	206	428	105	25	130	147	151	298		1166
	428999_430018_gene	85	70	155	17	10	27	236	216	452	127	38	165	161	210	371		1170
	142195_142797_gene	117	91	208	40	28	68	85	84	169	90	25	115	301	316	617		1177
	409989_410423_gene	164	162	326	49	41	90	35	32	67	73	14	87	277	330	607		1177
	1414540_1415283_gene	231	193	424	104	104	208	47	49	96	207	44	251	91	109	200		1179
	17043_17894_gene	85	78	163	16	10	26	244	223	467	203	58	261	114	150	264		1181
	2276012_2278084_gene	117	128	245	31	24	55	124	111	235	98	19	117	240	291	531		1183
	1559774_1561249_gene	201	187	388	48	43	91	76	68	144	152	45	197	163	201	364		1184
	3083349_3083912_gene	78	73	151	7	1	8	309	282	591	129	19	148	127	160	287		1185
	2406709_2407614_gene	72	59	131	85	69	154	122	102	224	150	46	196	232	249	481		1186
	2629339_2630175_gene	158	172	330	32	27	59	85	87	172	121	34	155	220	252	472		1188
	1974973_1975641_gene	174	202	376	54	41	95	75	74	149	82	12	94	227	250	477		1191
	3218707_3219792_gene	104	107	211	20	24	44	270	281	551	161	36	197	76	114	190		1193
	1940874_1943180_gene	194	199	393	49	45	94	72	69	141	141	37	178	184	209	393		1199
	460141_460803_gene	202	193	395	66	67	133	30	37	67	99	19	118	242	246	488		1201
	203005_204084_gene	377	399	776	10	4	14	52	54	106	31	6	37	124	146	270		1203
	1676654_1678285_gene	134	131	265	21	29	50	189	179	368	166	39	205	144	172	316		1204
	154334_155065_gene	107	115	222	88	66	154	43	60	103	193	42	235	231	262	493		1207
	2739205_2740551_gene	285	267	552	40	32	72	56	43	99	31	6	37	215	232	447		1207
	13059_13316_gene	19	24	43	2	0	2	472	486	958	109	29	138	28	41	69		1210
	2790860_2791201_gene	157	174	331	34	23	57	63	50	113	94	15	109	288	313	601		1211
	2299553_2300860_gene	87	71	158	20	9	29	57	74	131	22	3	25	429	440	869		1212
	1673062_1675098_gene	108	118	226	53	49	102	57	51	108	141	32	173	264	340	604		1213
	3222761_3223774_gene	146	191	337	36	22	58	140	136	276	62	10	72	219	253	472		1215
	2650501_2651439_gene	169	141	310	25	34	59	95	84	179	103	19	122	262	285	547		1217
	1739982_1740437_gene	225	204	429	44	35	79	135	150	285	79	12	91	154	180	334		1218
	2558698_2560116_gene	117	115	232	40	33	73	152	124	276	113	31	144	225	275	500		1225
	3055208_3055828_gene	98	137	235	60	49	109	57	37	94	106	24	130	304	355	659		1227
	2126075_2126608_gene	168	156	324	53	49	102	77	66	143	118	37	155	215	288	503		1227
	1322190_1322813_gene	161	186	347	39	40	79	79	87	166	107	30	137	230	269	499		1228
	2591078_2591641_gene	159	147	306	39	35	74	70	79	149	140	44	184	255	263	518		1231
	832277_833233_gene	185	155	340	60	50	110	48	41	89	95	25	120	282	290	572		1231
	3033585_3034331_gene	169	187	356	58	46	104	92	109	201	198	43	241	154	175	329		1231
	2040510_2041529_gene	181	196	377	39	31	70	138	132	270	71	23	94	205	217	422		1233
	3161460_3162842_gene	489	475	964	6	3	9	37	56	93	36	2	38	61	69	130		1234
	3363124_3363975_gene	157	169	326	64	52	116	60	42	102	149	39	188	203	302	505		1237
	3186518_3187405_gene	77	80	157	67	64	131	122	106	228	90	17	107	279	338	617		1240
	981795_982292_gene	132	126	258	10	4	14	367	352	719	58	12	70	81	98	179		1240
	3162980_3164092_gene	133	138	271	47	33	80	164	152	316	111	29	140	201	234	435		1242
	1976198_1976419_gene	123	134	257	69	63	132	75	56	131	140	30	170	260	292	552		1242
	2810340_2810834_gene	230	226	456	6	6	12	292	250	542	125	30	155	36	42	78		1243
	1551307_1552482_gene	163	130	293	47	43	90	20	21	41	88	20	108	326	386	712		1244
	628114_630315_gene	135	151	286	30	34	64	112	112	224	99	25	124	262	284	546		1244
	3074894_3075970_gene	213	200	413	42	34	76	134	137	271	77	21	98	187	201	388		1246
	603867_604484_gene	136	128	264	72	70	142	47	46	93	334	90	424	157	170	327		1250
	1464351_1466816_gene	292	287	579	74	53	127	46	42	88	227	51	278	77	101	178		1250
	1761225_1761959_gene	260	229	489	54	39	93	74	53	127	242	59	301	103	138	241		1251
	3150972_3151715_gene	151	138	289	35	34	69	102	97	199	78	30	108	252	334	586		1251
	453681_454589_gene	68	56	124	70	53	123	112	101	213	149	30	179	275	338	613		1252
	1023865_1024554_gene	185	194	379	39	32	71	76	68	144	113	21	134	233	293	526		1254
	559574_560422_gene	104	109	213	121	104	225	90	83	173	57	22	79	271	297	568		1258
	2041557_2042243_gene	233	226	459	51	60	111	64	59	123	117	25	142	197	230	427		1262
	3344406_3344717_gene	70	51	121	9	9	18	385	365	750	160	35	195	81	99	180		1264
	2498937_2500532_gene	164	170	334	33	31	64	114	94	208	62	15	77	284	297	581		1264
	2429231_2430076_gene	181	146	327	61	45	106	55	51	106	124	33	157	280	294	574		1270
	2619875_2620780_gene	303	317	620	9	17	26	178	168	346	124	24	148	53	77	130		1270
	2779337_2780860_gene	142	122	264	17	14	31	254	241	495	39	7	46	221	219	440		1276
	827201_827764_gene	164	163	327	59	56	115	49	45	94	129	38	167	279	295	574		1277
	93312_94835_gene	137	122	259	100	75	175	50	38	88	163	39	202	264	290	554		1278
	2608329_2608817_gene	190	172	362	145	139	284	40	38	78	160	31	191	172	193	365		1280
	771222_772394_gene	198	218	416	33	18	51	139	160	299	125	37	162	168	184	352		1280
	2781365_2782657_gene	206	194	400	38	41	79	113	113	226	163	41	204	191	181	372		1281
	914284_915318_gene	121	121	242	124	136	260	34	29	63	238	47	285	206	226	432		1282
	1415283_1415807_gene	234	209	443	78	45	123	60	55	115	132	39	171	186	244	430		1282
	596672_597496_gene	174	152	326	41	35	76	105	63	168	162	37	199	239	279	518		1287
	2647010_2647636_gene	264	264	528	30	20	50	42	65	107	52	17	69	261	272	533		1287
	2035596_2036567_gene	156	163	319	44	42	86	85	82	167	92	19	111	276	329	605		1288
	736392_737699_gene	112	110	222	95	75	170	53	64	117	104	17	121	293	371	664		1294
	1547281_1548381_gene	192	158	350	64	53	117	61	54	115	132	30	162	269	281	550		1294
	2232545_2233093_gene	206	205	411	85	75	160	63	53	116	225	57	282	158	168	326		1295
	626434_627249_gene	133	140	273	88	80	168	48	56	104	103	26	129	313	312	625		1299
	2582785_2583423_gene	185	198	383	26	29	55	85	90	175	49	11	60	319	309	628		1301
	1022940_1023875_gene	162	177	339	40	35	75	75	73	148	98	17	115	273	351	624		1301
	2058990_2059520_gene	172	158	330	69	62	131	23	24	47	128	25	153	305	337	642		1303
	503312_504181_gene	123	124	247	105	88	193	62	80	142	154	46	200	258	264	522		1304
	353425_356094_gene	154	148	302	86	44	130	46	33	79	90	24	114	326	355	681		1306
	2234514_2235707_gene	188	174	362	51	39	90	35	31	66	117	30	147	283	359	642		1307
	2907214_2907627_gene	232	228	460	17	17	34	93	91	184	94	20	114	248	267	515		1307
	97493_98083_gene	151	130	281	56	29	85	74	67	141	171	32	203	284	314	598		1308
	3132777_3133277_gene	88	95	183	60	59	119	111	119	230	127	31	158	296	329	625		1315
	2657485_2658048_gene	179	168	347	52	53	105	89	112	201	156	50	206	207	250	457		1316
	2980029_2981411_gene	158	164	322	73	59	132	119	99	218	262	63	325	152	168	320		1317
	516084_516827_gene	128	124	252	49	59	108	39	36	75	86	29	115	386	382	768		1318
	3286171_3286794_gene	215	207	422	41	33	74	97	66	163	78	18	96	270	297	567		1322
	1605883_1607217_gene	134	115	249	48	40	88	88	94	182	118	26	144	291	369	660		1323
	618629_619300_gene	202	180	382	35	34	69	57	65	122	77	21	98	309	344	653		1324
	873669_875318_gene	251	210	461	80	52	132	107	89	196	114	28	142	180	214	394		1325
	156480_157550_gene	134	99	233	108	93	201	11	9	20	134	32	166	335	370	705		1325
	3089813_3090736_gene	119	111	230	69	43	112	141	148	289	140	45	185	245	264	509		1325
	82906_84477_gene	68	54	122	24	17	41	331	325	656	254	54	308	99	100	199		1326
	1709773_1710342_gene	187	174	361	61	51	112	98	100	198	98	20	118	244	302	546		1335
	726983_727747_gene	132	118	250	18	22	40	171	171	342	150	35	185	253	265	518		1335
	2166115_2167431_gene	123	102	225	10	14	24	316	318	634	146	27	173	139	147	286		1342
	250165_250665_gene	172	137	309	81	65	146	123	101	224	137	34	171	248	244	492		1342
	1768731_1770155_gene	189	188	377	44	26	70	130	141	271	119	20	139	220	267	487		1344
	479275_479619_gene	158	172	330	50	39	89	144	138	282	220	64	284	167	192	359		1344
	1558192_1559712_gene	156	141	297	51	36	87	133	108	241	147	37	184	251	284	535		1344
	1054066_1055307_gene	147	145	292	30	21	51	316	259	575	203	54	257	84	86	170		1345
	2355910_2356398_gene	201	224	425	15	19	34	148	145	293	145	45	190	178	226	404		1346
	1695724_1697724_gene	258	256	514	40	46	86	45	39	84	161	26	187	247	229	476		1347
	825265_825408_misc_RNA	137	127	264	43	43	86	100	71	171	29	4	33	366	429	795		1349
	1544952_1545857_gene	178	173	351	71	50	121	37	33	70	113	29	142	321	344	665		1349
	207491_208723_gene	368	330	698	19	19	38	89	79	168	53	17	70	175	207	382		1356
	3021320_3021811_gene	164	173	337	71	59	130	117	103	220	163	35	198	215	257	472		1357
	617366_618619_gene	140	111	251	54	51	105	65	79	144	102	33	135	326	397	723		1358
	1766852_1766928_gene	26	25	51	125	107	232	4	5	9	432	117	549	245	273	518		1359
	3286884_3288533_gene	169	180	349	68	45	113	113	113	226	120	19	139	268	266	534		1361
	1583658_1584497_gene	123	117	240	150	130	280	30	25	55	210	55	265	245	278	523		1363
	2602779_2603561_gene	129	89	218	39	15	54	288	268	556	128	29	157	171	207	378		1363
	2013722_2013773_misc_RNA	244	193	437	4	1	5	356	289	645	26	2	28	117	133	250		1365
	3264100_3264669_gene	133	107	240	41	32	73	328	293	621	109	21	130	150	157	307		1371
	1945747_1946115_gene	159	151	310	50	28	78	114	130	244	78	22	100	286	355	641		1373
	1452399_1454774_gene	190	169	359	67	55	122	113	108	221	159	41	200	218	254	472		1374
	1915872_1916636_gene	172	171	343	58	54	112	39	40	79	136	37	173	316	352	668		1375
	1833166_1833933_gene	194	184	378	76	54	130	28	23	51	65	16	81	367	372	739		1379
	2742145_2743791_gene	132	123	255	19	12	31	334	299	633	185	39	224	107	129	236		1379
	1943704_1944492_gene	191	188	379	51	27	78	164	146	310	113	21	134	228	254	482		1383
	1594805_1595551_gene	207	194	401	73	78	151	44	37	81	165	57	222	240	293	533		1388
	1548437_1549729_gene	95	92	187	79	40	119	98	101	199	125	23	148	355	380	735		1388
	2787861_2790086_gene	197	206	403	69	47	116	91	72	163	208	42	250	216	242	458		1390
	1707811_1708485_gene	116	133	249	72	61	133	136	140	276	100	21	121	262	352	614		1393
	696023_696805_gene	149	165	314	41	44	85	85	77	162	189	30	219	295	319	614		1394
	1126856_1127824_gene	135	109	244	33	32	65	193	204	397	143	40	183	228	279	507		1396
	8314_10206_gene	179	175	354	98	94	192	47	64	111	111	22	133	289	318	607		1397
	1766981_1768267_gene	159	193	352	54	42	96	72	64	136	126	34	160	298	355	653		1397
[truncated: 1,103 more rows]
