# Supplementary material for: Sequencing Illustrates the Transcriptional Response of Legionella pneumophila during Infection and Identifies Seventy Novel Small Non-Coding RNAs
Source: PLoS One. 2011 Mar 3;6(3):e17570. doi: 10.1371/journal.pone.0017570 (PMC3048289; doi:10.1371/journal.pone.0017570)
Supplement: Table S10 — Antisense ncRNAs. (XLS) [file pone.0017570.s010.xls]

## Sheet: Anti-sense
List of antisense ncRNAs to known genes
ncRNA	start	stop	strand	Anti-start	Anti-end	Anti-strand	second hit	hit	description	COG
lpr0002	33166	33516	1	33175	34170	-1	0	lpg0027	low affinity inorganic phosphate transporter	COG0306P
lpr0003	45316	45539	1	44731	46254	-1	0	lpg0038	ankyrin repeat-containing protein	COG0666R
lpr0004	45714	45904	1	44731	46254	-1	0	lpg0038	ankyrin repeat-containing protein	COG0666R
lpr0006	74729	74969	-1	74426	75856	1	0	lpg0066	phosphoribosylglycinamide synthetase ATP-grasp (A) domain protein	COG0439I
lpr0008	262101	262297	1	262200	263765	-1	1	lpg0228	amino acid permease family protein	COG0531E
lpr0009	291705	291852	1	289454	292834	-1	0	lpg0245	NAD-glutamate dehydrogenase	COG2902E
lpr0012	369457	369510	-1	369119	369652	1	0	lpg0320	50S ribosomal protein L10	COG0244J
lpr0015	425602	425773	-1	425369	428224	1	0	lpg0384	excinuclease ABC A subunit	COG0178L
lpr0016	532155	532291	-1	531865	533082	1	0	lpg0494	argininosuccinate synthase	COG0137E
lpr0017	539616	539866	1	538358	539695	-1	0	lpg0499	carboxy-terminal protease	COG0793M
lpr0017	539616	539866	1	539776	540945	-1	1	lpg0500	peptidase, M23/M37 family	COG4942D
lpr0018	662203	662439	1	660200	662407	-1	0	lpg0626	DNA uptake/competence protein ComA	COG0658R,COG2333R
lpr0019	662451	663193	1	662485	662934	-1	0	lpg0627	type IV pilin	COG4968NU
lpr0019	662451	663193	1	662946	666464	-1	1	lpg0628	type IV fimbrial biogenesis PilY1-related protein	COG3419NU
lpr0020	685864	686010	-1	683868	688331	1	0	lpg0644	hypothetical protein	-
lpr0021	744637	744929	1	744892	746772	-1	0	lpg0691	DNA topoisomerase IV subunit B	COG0187L
lpr0025	825265	825408	-1	824990	825598	1	0	lpg0754	acetyltransferase	COG0110R
lpr0026	837669	837871	1	837477	838595	-1	0	lpg0766	hypothetical protein	-
lpr0028	871409	871501	-1	870831	871481	1	0	lpg0796	hypothetical protein	-
lpr0029	1046144	1046275	-1	1045932	1048115	1	0	lpg0959	bacterial extracellular solute-binding protein	COG0747E,COG4166E
lpr0031	1135190	1135290	-1	1134772	1137846	1	0	lpg1035	copper efflux ATPase	COG2132Q,COG3667P
lpr0033	1330454	1330562	-1	1329862	1331394	1	0	lpg1202	cytochrome D ubiquinol oxidase, subunit I	COG1271C
lpr0036	1385926	1386008	1	1385725	1386591	-1	0	lpg1259	LvrA	-
lpr0037	1425122	1425478	1	1425272	1426126	-1	0	lpg1297	5,10-methylenetetrahydrofolate dehydrogenase	COG0190H
lpr0043	2040383	2040499	1	2039223	2040389	-1	0	lpg1821	dihydroorotate oxidase	COG0167F
lpr0044	2122901	2122994	-1	2122839	2123741	1	0	lpg1903	hydrolase	COG0596R
lpr0049	2389117	2389440	-1	2389116	2389376	1	0	lpg2142	hypothetical protein	-
lpr0050	2418506	2418574	-1	2416693	2421213	1	0	lpg2157	Sid related protein-like	-
lpr0053	2564056	2564155	-1	2563654	2565060	1	0	lpg2261	phosphate acetyl/butyryltransferase family protein) includes: (de)hydratase mit MaoC domain)	COG0280C,COG2030I
lpr0054	2574715	2574935	-1	2574377	2575027	1	0	lpg2271	hypothetical protein	-
lpr0058	2867415	2867524	-1	2867089	2867496	1	0	lpg2535	myoglobin-like	COG2346R
lpr0058	2867415	2867524	-1	2867493	2868449	1	1	lpg2536	ferredoxin reductase	COG0543HC
lpr0062	2948692	2948783	1	2947732	2948838	-1	0	lpg2612	D-alanine-D-alanine ligase A	COG1181M
lpr0065	3095189	3095277	1	3094245	3095414	-1	0	lpg2744	hypothetical protein	-
lpr0071	3351555	3351860	1	3350981	3351847	-1	0	lpg2961	major outer membrane protein	-
lpr0072	3374990	3375092	1	3374808	3375230	-1	0	lpg2981	ATP synthase epsilon chain, ATP synthase F1 epsilon subunit	COG0355C
