# Supplementary material for: Sequencing Illustrates the Transcriptional Response of Legionella pneumophila during Infection and Identifies Seventy Novel Small Non-Coding RNAs
Source: PLoS One. 2011 Mar 3;6(3):e17570. doi: 10.1371/journal.pone.0017570 (PMC3048289; doi:10.1371/journal.pone.0017570)
Supplement: Table S11 — Expression counts ncRNA family. (XLS) [file pone.0017570.s011.xls]

## Sheet: Sheet1
Expression counts of the transcriptome - ncRNA family
E and PE represents exponential and post-exponetial growth of L. pneumophila Phil-1 grown in broth (T7 and T12)
RP and TP represents replicative phase and transmissive phase of L. pneumophila Phil-1 grown inside of A. castellanii (T11 and T14)
Red color shows up-regulation and green color down-regulation at late infection or broth growth time points (TP and PE)
RPM = reads per million
Start	Stop	t7_unique_bowtie.out	E RPM	t10_unique_bowtie.out	t10 RPM	t12_unique_bowtie.out	PE RPM	t11_unique_bowtie.out	RP RPM	t14_unique_bowtie.out	TP RPM	M E vs PE	M RP vs TP
18027	18215	230	77.3394	208	95.4995	116	41.4466	317	492.371	1513	1721.79	-0.899951	1.80609
120696	120825	33	11.0965	21	9.64178	15	5.35947	4	6.21288	8	9.10398	-1.04995	0.551235
413298	413495	52	17.4854	15	6.88699	23	8.21786	14	21.7451	30	34.1399	-1.08932	0.650771
713174	713371	19	6.38891	17	7.80525	11	3.93028	2	3.10644	2	2.27599	-0.700938	-0.448765
753081	753274	111	37.3247	81	37.1897	14	5.00217	123	191.046	68	77.3838	-2.8995	-1.30382
1300013	1300211	4	1.34503	1	0.459132	1	0.357298	0	0	2	2.27599	-1.91244
2233150	2233346	14	4.70762	19	8.72352	3	1.07189	4	6.21288	3	3.41399	-2.13483	-0.863803
2389174	2389369	50	16.8129	12	5.50959	7	2.50109	13	20.1919	26	29.5879	-2.74894	0.551235
2525210	2525381	7	2.35381	3	1.3774	1	0.357298	1	1.55322	0	0	-2.7198
2547968	2548086	8	2.69007	2	0.918265	1	0.357298	2	3.10644	2	2.27599	-2.91244	-0.448765
2570029	2570187	2	0.672517	0	0	1	0.357298	1	1.55322	0	0	-0.912442
2598169	2598366	39	13.1141	16	7.34612	8	2.85839	13	20.1919	25	28.4499	-2.19784	0.494651
2707307	2707499	42	14.1229	27	12.3966	21	7.50326	7	10.8725	16	18.208	-0.912442	0.74388
2768902	2769062	310	104.24	115	52.8002	27	9.64705	80	124.258	30	34.1399	-3.43368	-1.8638
2837177	2837373	6	2.01755	8	3.67306	2	0.714596	2	3.10644	1	1.138	-1.4974	-1.44877
2905618	2905809	11	3.69884	21	9.64178	3	1.07189	3	4.65966	4	4.55199	-1.78691	-0.0337276
2921317	2921517	70	23.5381	12	5.50959	7	2.50109	83	128.917	163	185.493	-3.23437	0.524924
2921640	2921822	94	31.6083	52	23.8749	40	14.2919	22	34.1708	30	34.1399	-1.1451	-0.00130611
3303398	3303594	62	20.848	31	14.2331	170	60.7407	187	290.452	935	1064.03	1.54275	1.87316
3339742	3339939	31	10.424	98	44.995	14	5.00217	8	12.4258	11	12.518	-1.05928	0.0106665
		2973903		2178021		2798783		643824		878737
